# Supplementary material for: Dissecting the genetic control of root and leaf tissue-specific anthocyanin pigmentation in carrot (Daucus carota L.)
Source: Springer Nature journal article supplement (doi:10.1007/s00122-019-03366-5), 2019-05-29
Supplement: MOESM1 [file 122_2019_3366_MOESM1_ESM.docx]

**Theoretical and Applied Genetics**

**Dissecting the genetic control of root and leaf tissue-specific anthocyanin pigmentation in carrot (*Daucus carota* L.)**

**Florencia Bannoud1, Shelby Ellison2, Marcos Paolinelli1,3, Thomas Horejsi2, Douglas Senalik2, Martín Fanzone3, Massimo Iorizzo4, Philipp W. Simon2,5,*, Pablo F. Cavagnaro1,6,***

1 Consejo Nacional de Investigaciones Científicas y Técnicas (CONICET), Av. Rivadavia 1917, Buenos Aires C1033AAJ, Argentina

2 USDA-Agricultural Research Service, Vegetable Crops Research Unit, University of Wisconsin-Madison, 1575 Linden Drive, Madison, WI 53706-1590, USA

3 Instituto Nacional de Tecnología Agropecuaria INTA EEA Mendoza, San Martin 3853, Luján de Cuyo, Mendoza 5507, Argentina

4 Plants for Human Health Institute, North Carolina State University, Kannapolis; and Department of Horticultural Science, North Carolina State University, Raleigh, North Carolina, USA

5 Department of Horticulture, University of Wisconsin-Madison, 1575 Linden Drive, Madison, WI 53706-1590, USA

6 Instituto de Horticultura, Facultad de Ciencias Agrarias, Universidad Nacional de Cuyo; and Instituto Nacional de Tecnología Agropecuaria (INTA) - E.E.A. La Consulta, Ex Ruta 40 km 96, La Consulta, San Carlos, Mendoza 5567, Argentina

* Correspondence:

Pablo F. Cavagnaro. E-mail: cavagnaro.pablo@inta.gob.ar; Tel.: +54-261-460-5737

Philipp W. Simon. E-mail: Philipp.Simon@ars.usda.gov; Tel.: +1-608-262-1248

**SUPPLEMENTARY MATERIAL – FIGURES S1-S15**

**List of figures in this file**

**Supplementary Figure S1. A.** Root phenotypes in the mapping population 3242. **B.** Carrot root samples used for transcriptome analysis. Sets dP, mP, and pP present high, intermediate, and low anthocyanin concentration in the phloem, respectively. Anthocyanins are absent in the roots of sample sets Y1 and Or1, as well as in sets Y2, Or2 and Or3 (images not shown).

**Supplementary Figure S2.** Carrot linkage maps of population 3242 (A) and 5171 (B).Linkage groups (LGs) were constructed using a LOD value ≥1 0. LGs were named according to their corresponding chromosomes (CHR). Assignment of the LGs to the chromosomes was done through physical localization of the GBS markers in the annotated carrot genome sequence. Asterisks indicate markers that were significantly distorted from the expected segregation ratio for codominant markers in an F2 or F4 population, at p< 0.005 (*) and p<0.001 (**).

**Supplementary Figure S3.** Relative frequency distributions of residuals of the QTL models for individual and combined phloem anthocyanin pigments. Normality on the residuals was tested by Shapiro-Wilk test and p-values are shown next to each histogram. ANT: anthocyanins.

**Supplementary Figure S4.** Relative frequency distributions of residuals of the QTL models for individual and combined xylem anthocyanin pigments. Normality on the residuals was tested by Shapiro-Wilk test and p-values are shown next to each histogram. ANT: anthocyanins.

**Supplementary Figure S5.** Genetic mapping of QTL for concentration of individual and combined anthocyanin pigments present in the root phloem of population 3242, obtained with the multiple imputation method. QTL for individual (in black font) and combined (in red font) anthocyanin pigments present in the root phloem are indicated on the right of the LG, with each bar indicating the 1.5 LOD interval and the position of the maximum LOD value for the QTL. QTL were named with the root tissue (Ph=phloem) followed by the abbreviated quantitative trait (as described in Table 2) and the QTL number for that trait (for a given trait, QTL were numbered in decreasing order based on their explanatory power).

**Supplementary Figure S6.** Genetic mapping of QTL for concentration of individual and combined anthocyanin pigments present in the root phloem of population 3242, obtained with the Haley Knott regression method. QTL for individual (in black font) and combined (in red font) anthocyanin pigments present in the root phloem are indicated on the right of the LG, with each bar indicating the 1.5 LOD interval and the position of the maximum LOD value for the QTL. QTL were named with the root tissue (Ph=phloem) followed by the abbreviated quantitative trait (as described in Table 2) and the QTL number for that trait (for a given trait, QTL were numbered in decreasing order based on their explanatory power).

**Supplementary Figure S7. A.** Marker effect plots for QTL for phloem anthocyanins with significant interaction. **B.** Marker effect plots for significant QTL for phloem (Ph) and xylem (Xy) anthocyanin content. QTL were named with the root tissue (Ph=phloem, Xy=xylem) followed by the abbreviated quantitative trait (as described in Table 2) and the QTL number for that trait (for a given trait, QTL were numbered in decreasing order based on their explanatory power), as described in Table 3.

**Supplementary Figure S8.** Genetic mapping of QTL for concentration of individual and combined anthocyanin pigments in the roots of population 5171, obtained with the Haley Knott regression method. Pigment content was expressed as percentage (%) relative to the total anthocyanin content in the root, and as mg per gram dry weight (mg/g dw). QTL for individual (in black font) and combined (in red font) are indicated on the right of the LG, with each bar indicating the 1.5 LOD interval and the position of the maximum LOD value for the QTL. QTL were named with the root tissue (Ph=phloem,) followed by the abbreviated quantitative trait (as described in Table 2) and the QTL number for that trait (for a given trait, QTL were numbered in decreasing order based on their explanatory power).

**Supplementary Figure S9 – A.** Phylogenetic relationships among ten carrot MYB TFs located within the *P*1 (blue circles) and *P*3 (red circles) regions, and MYBs from other species known to be involved in the regulation of different flavonoid compounds. The tree was constructed with MEGA X software using neighbor-joining phylogeny testing with 1,000 bootstrap replicates. Percentage values of replicate trees (>50) in which the associated taxa clustered together in the bootstrap test are indicated next to the branches. Accession numbers and gene IDs for the protein sequences used in the analysis are in Supplementary Table S14.

**Supplementary Figure S9 – B.** Protein sequence alignment of the conserved region of the MYB R2R3 domain of ten carrot MYBs and 52 MYB TFs of other species known to be involved in the regulation of different flavonoid compounds. Arrows indicate three specific amino-acid residues at positions 39 (R), 64 (V), and 97 (A), which are conserved across transcription-activating MYBs involved in anthocyanin biosynthesis. The large rectangle includes all the MYB genes that were phylogenetically clustered into the ‘anthocyanin activators’ clade (see Figure S9 – A), and the vertical small rectangle indicates the conserved motif [A/S/G]N[D/A]V in the R2R3 domain characteristic for dicot anthocyanin-promoting MYBs (Lin-Wang et al., 2010).

**Supplementary Figure S10.** Phylogenetic relationships among six carrot bHLH TFs located within the *P*3 (red circles) region, and bHLH genes from other species. The subgroups in the bHLH TF family were previously defined by Pires and Dolan (2010) and Feller et al. (2011). Previously characterized bHLH genes from other species known to be involved in the regulation of anthocyanin biosynthesis correspond to sub-group IIIf, indicated by an asterisk. The tree was constructed MEGA X, using neighbor-joining phylogeny testing with 1,000 bootstrap replicates. Percentage values of replicate trees (>50) in which the associated taxa clustered together in the bootstrap test are indicated next to the branches. Accession numbers and gene IDs for the protein sequences used in the analysis are in Supplementary Table S14.

**Supplementary Figure S11.** Phylogenetic relationships among WD40 TFs located within the *P*1 (blue circles) and *P*3 (red circles) regions of CHR 3 and WD40 genes from other species. Previously characterized WD40 genes from other species known to be involved in the regulation of anthocyanin biosynthesis are indicated with yellow stars. The tree was constructed using MEGA X, neighbor-joining phylogeny testing, with 1,000 bootstrap replicates. Percentage values of replicate trees (>50) in which the associated taxa clustered together in the bootstrap test are indicated next to the branches. Accession numbers and gene IDs for the protein sequences used in the analysis are in Supplementary Table S14.

**Supplementary Figure S12.** Venn diagrams depicting the number of differentially expressed genes (DEGs) among all 15 pairwise comparisons between purple and non-purple roots in the *P*1 (panel A) and *P*3 (panel B) regions of CHR 3 harboring QTL for root and petiole tissue-specific anthocyanins. DEGs in red and green are upregulated and downregulated in purple roots, respectively.

**Supplementary Figure S13.** Phylogenetic relationships among MADS-box transcription factors from diverse plant species, including the carrot MADS-box gene DCAR_010757 located in *P*3 region of CHR 3 (red dot). MADS-box genes known to be involved in the regulation of anthocyanin biosynthesis are indicated with yellow stars. The tree was constructed using MEGA X, neighbor-joining phylogeny testing, with 1,000 bootstrap replicates. Percentage values of replicate trees (>50) in which the associated taxa clustered together in the bootstrap test are indicated next to the branches. Accession numbers and gene IDs for the protein sequences used in the analysis are in Supplementary Table S14.

**Supplementary Figure S14.** Schematic representation of the flavonoid and anthocyanin pathways in plants (modified from the Kyoto Encyclopedia of Genes and Genomes-KEGG- database). Structural genes are in bold.

**Supplementary Figure S15**. Phylogenetic analysis of Cytochrome P450 enzymes involved in the flavonoid pathway. Aminoacid sequences of different P450s families and subfamilies (CYP75, CYP81E, CYP93A, CYP93B and CYP93G) were downloaded from GenBank and used to construct the phylogenetic tree using the Neighbor-joining method, Poisson model and 1000 bootstrap replicates as parameters in MEGA X. The percentage of replicate trees in which the associated taxa clustered together in the bootstrap test are shown next to the branches. The two carrot Cytochrome P450 (DCAR_009041 and DCAR_009043), which are located in the *P*1 region of CHR 3 and were differentially expressed in transcriptome comparisons among purple carrots with different anthocyanin content, are indicated with blue dots. Accession numbers and gene IDs for the protein sequences used in the analysis are in Supplementary Table S19. Abbreviations for the sub-types of Cytochrome P450 are as follows: D6aH: 3, 9-dihydroxypterocarpan 6A-monooxygenase; F3'H: Flavonoid 3' hydroxylase; F3'5'H: Flavonoid 3', 5' hydroxylase; IFH: Isoflavone hyroxylase; F2H: (2S)-flavanone 2-hydroxylase; FNS: Flavone synthase.

**
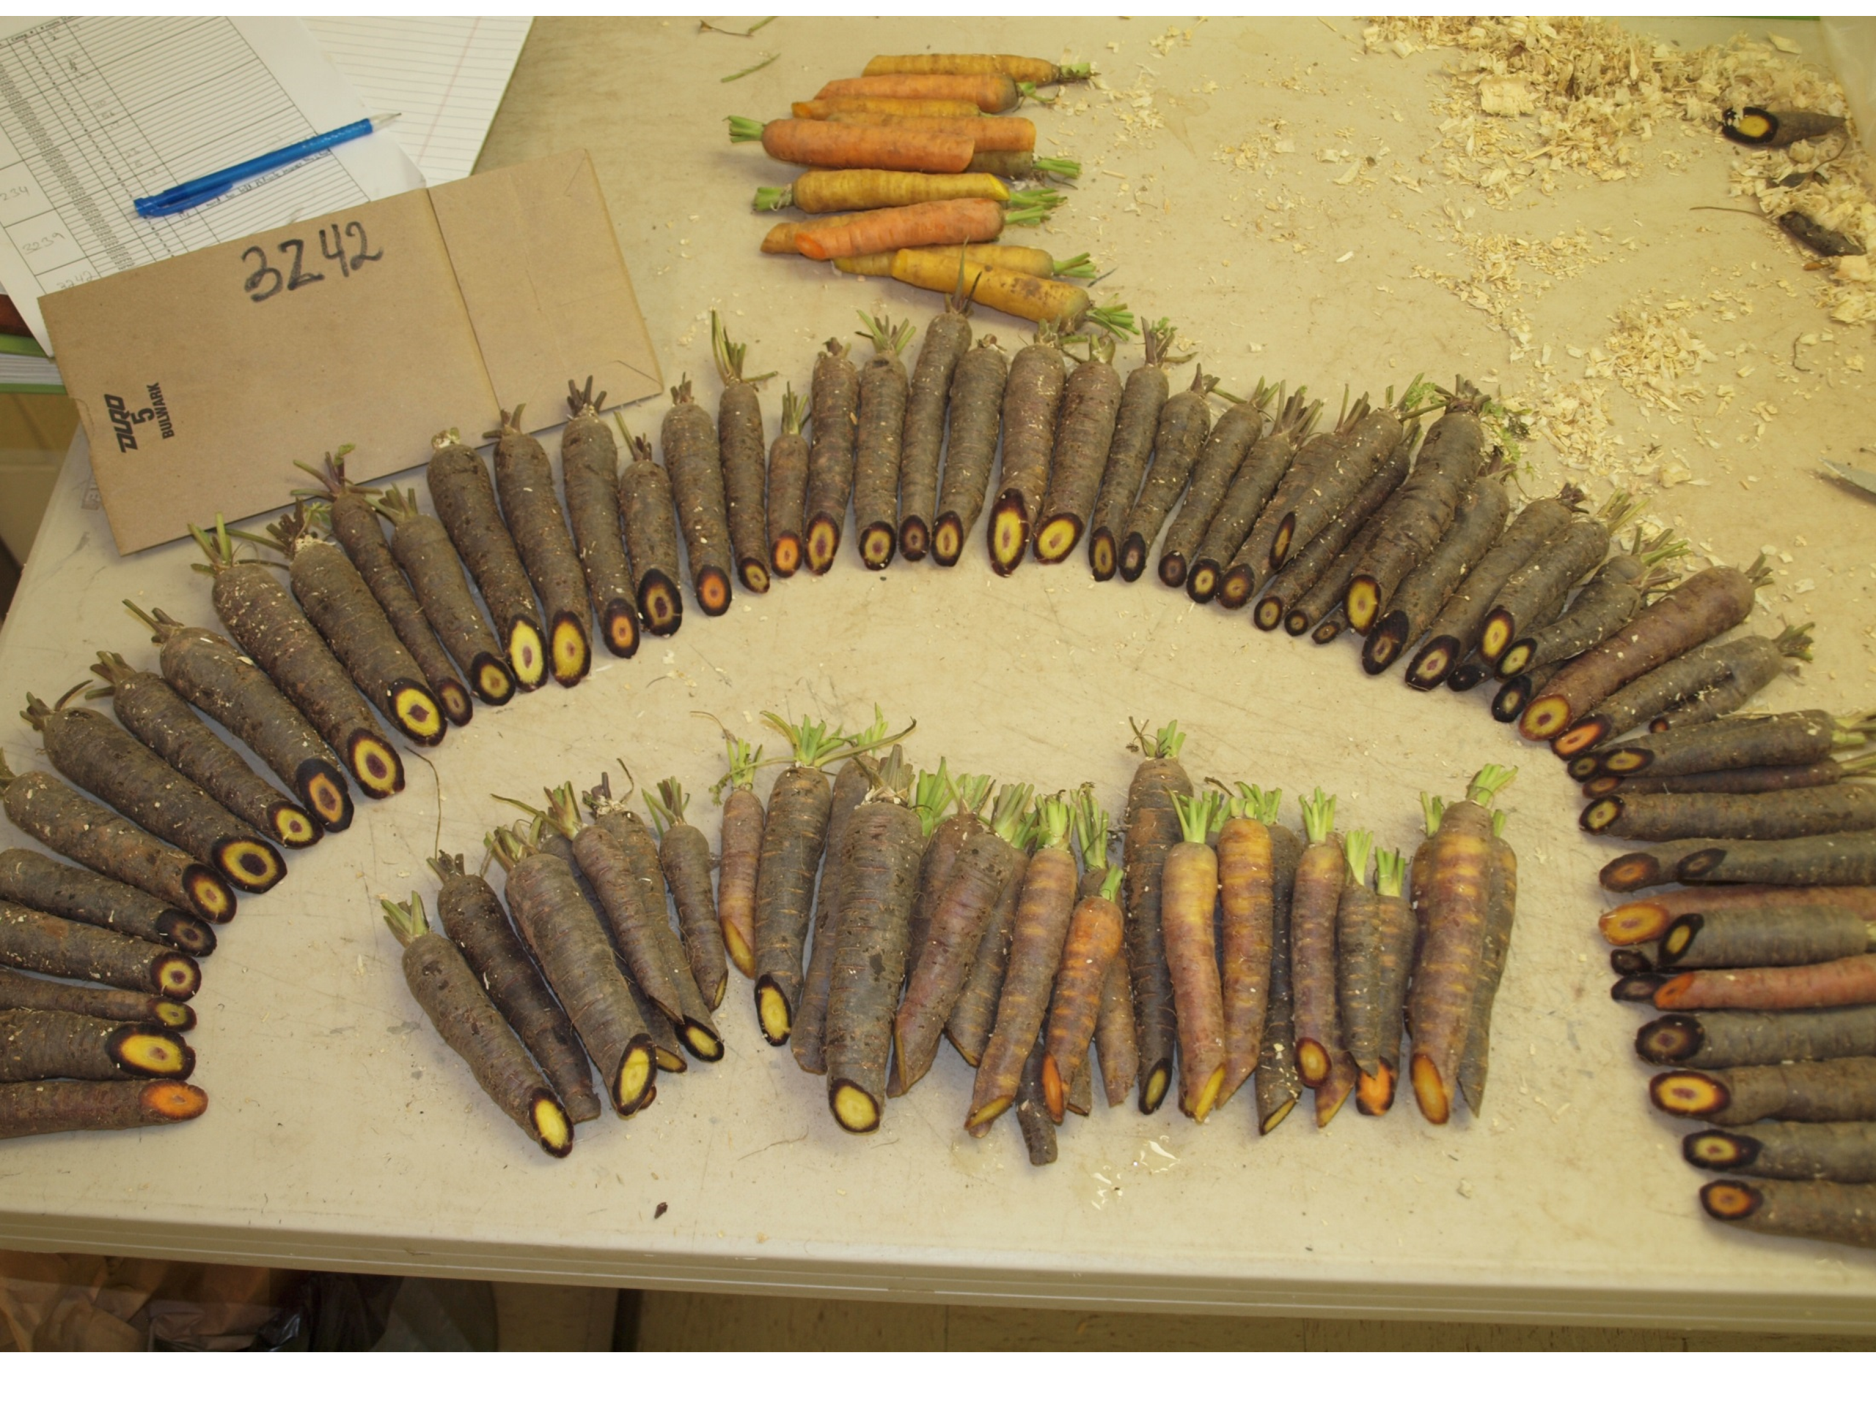
**

**Supplementary Figure S1-A.** Root phenotypes in the mapping population 3242.

**Supplementary Figure S1-B.** Carrot root samples used for transcriptome analysis. Sets dP, mP, and pP present high, intermediate, and low anthocyanin concentration in the phloem, respectively. Anthocyanins are absent in the roots of sample sets Y1 and Or1, as well as in sets Y2, Or2 and Or3 (images not shown).


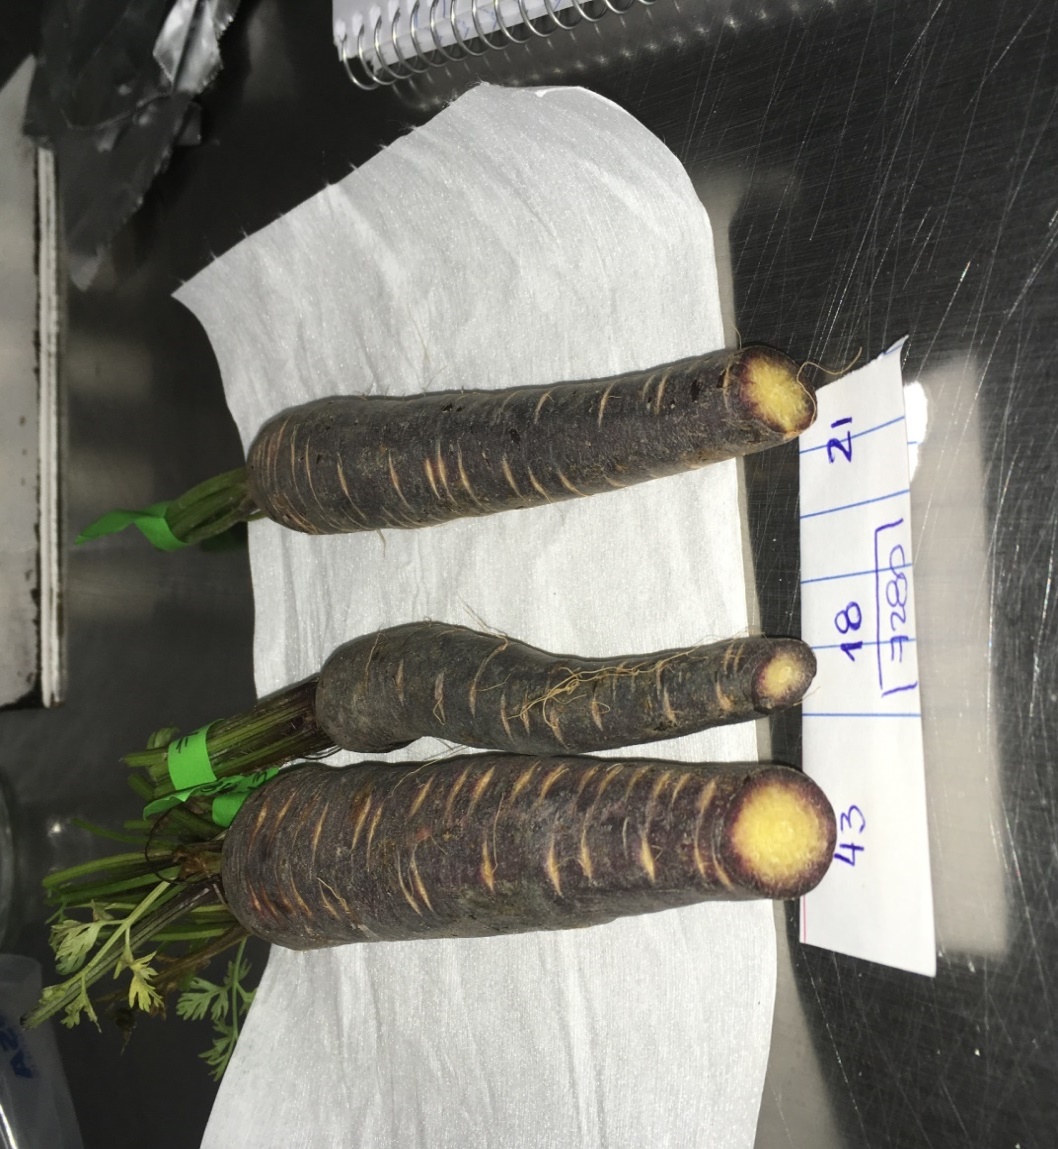

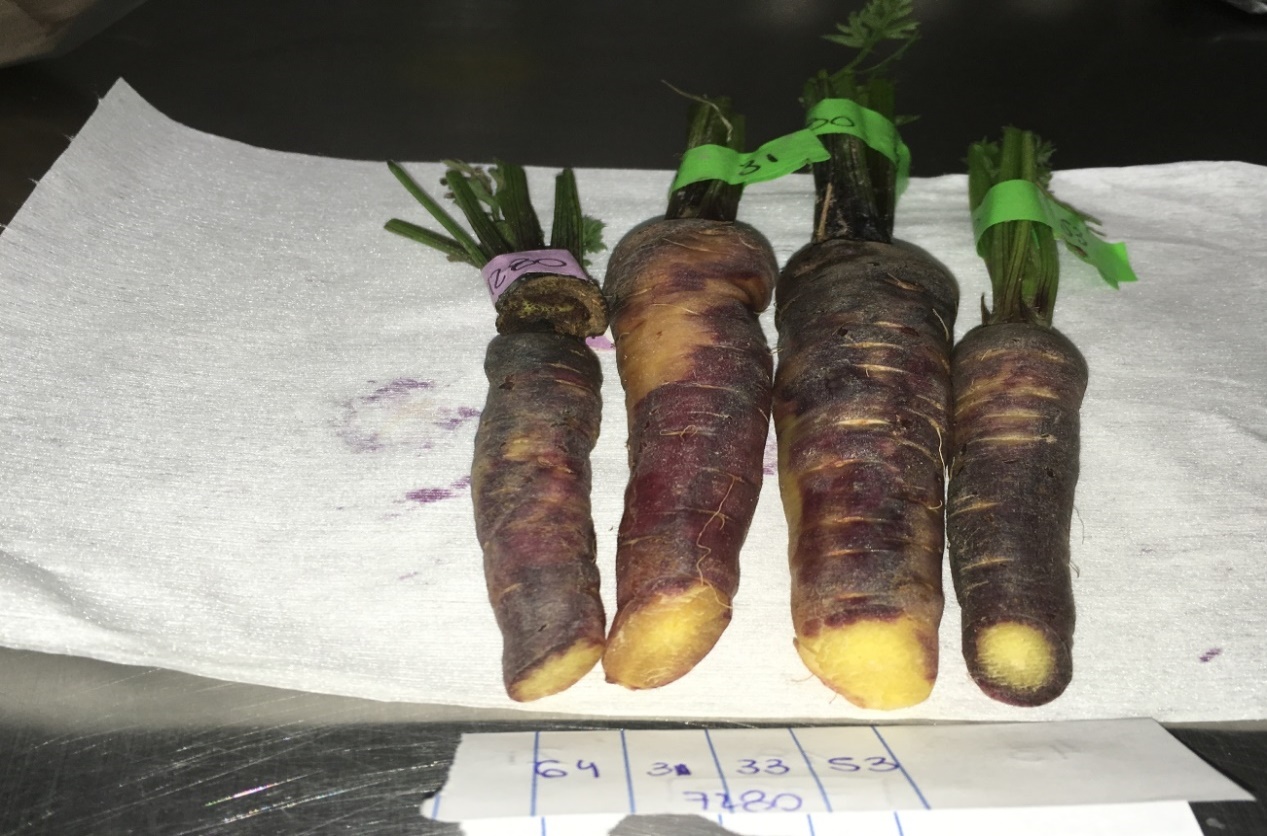

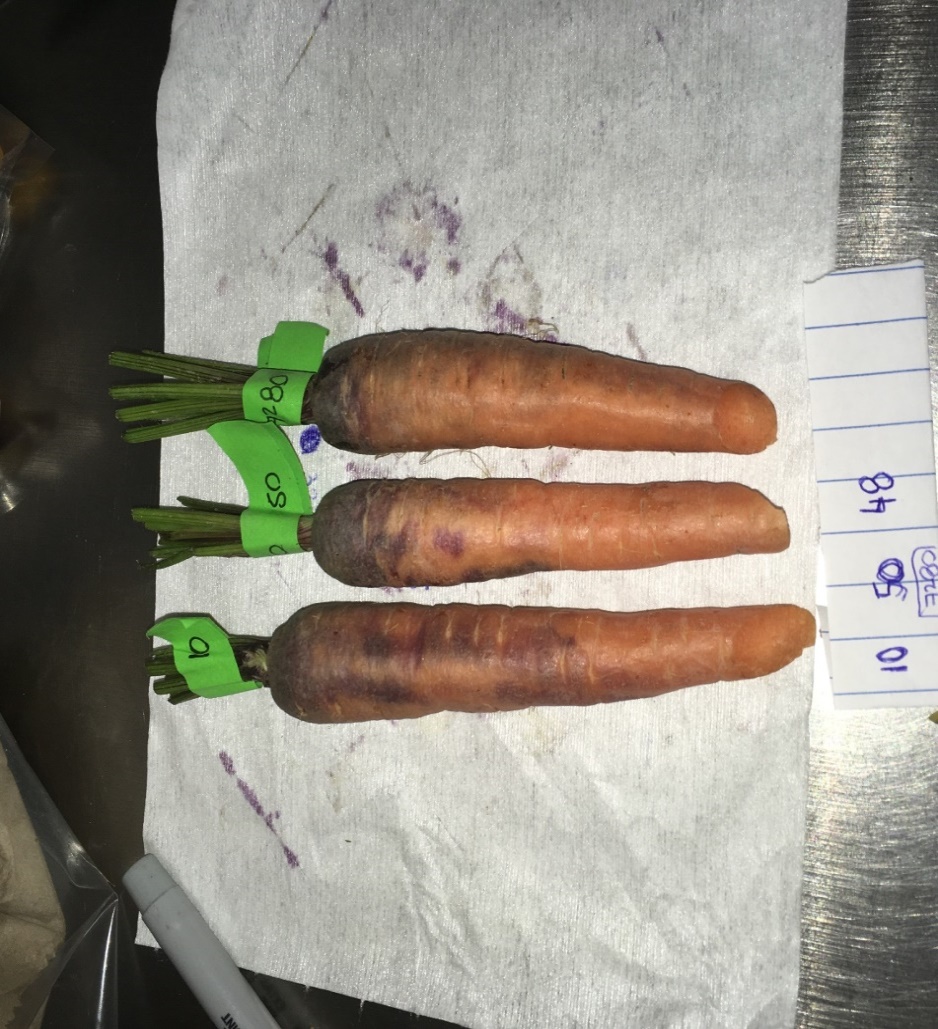

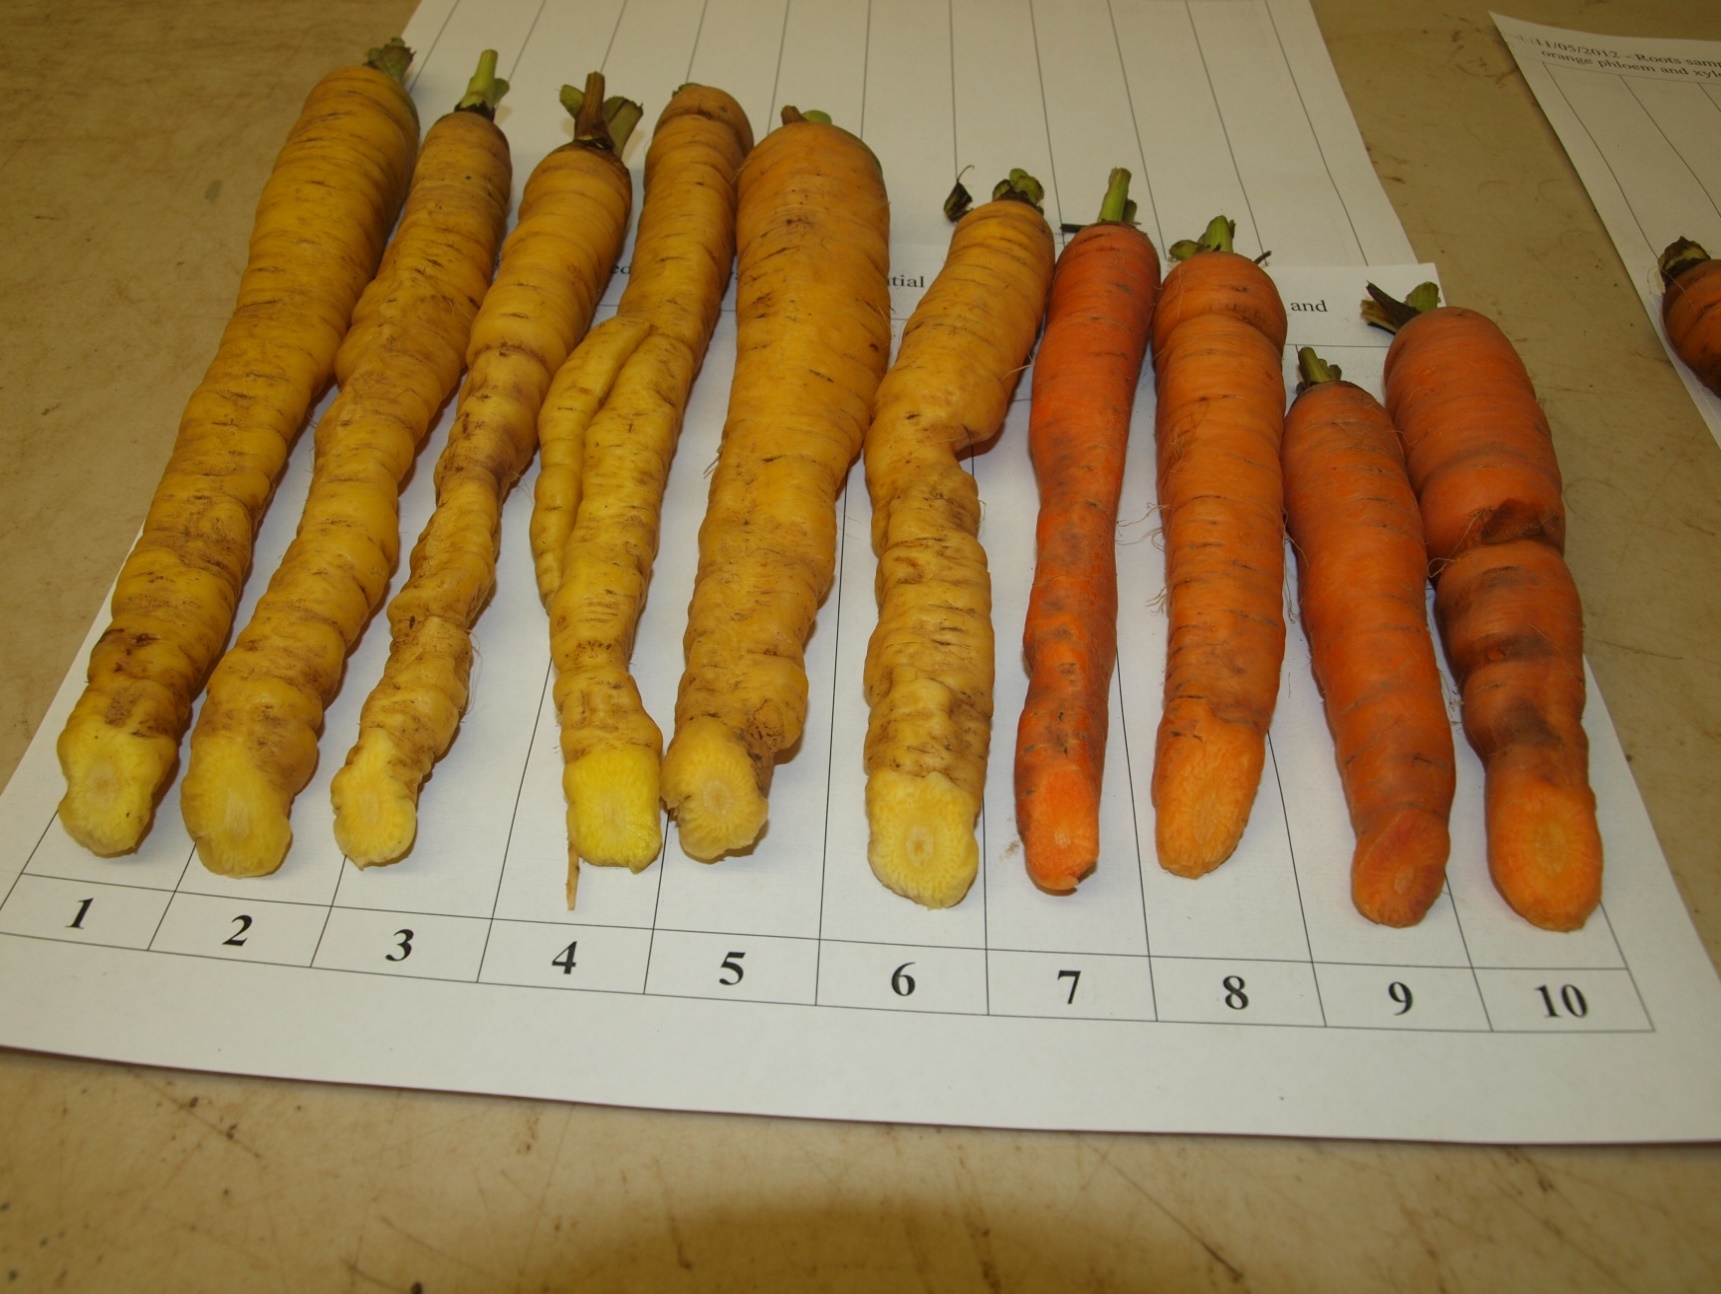


**dark purple roots**

**(dP)**

**medium purple roots (mP)**

**pale purple roots**

**(pP)**

**yellow roots**

**(Y1)**

**orange roots**

**(Or1)**

**A**

**CHR 1**

**CHR 2**

**CHR 4**

**CHR 3**

**CHR 5**

**CHR 6**

**CHR 7**

**CHR 8**

**CHR 9**

**Supplementary Figure S2.** Carrot linkage maps of population 3242 (A) and 5171 (B).Linkage groups (LGs) were constructed using a LOD value ≥10. LGs were named according to their corresponding chromosomes (CHR). Assignment of the LGs to the chromosomes was done through physical localization of the GBS markers in the annotated carrot genome sequence. Asterisks indicate markers that were significantly distorted from the expected segregation ratio for codominant markers in an F2 or F4 population, at p< 0.005 (*) and p<0.001 (**).

**CHR 1**

**CHR 2**

**CHR 3**

**CHR 5**

**CHR 6**

**CHR 7**

**CHR 8**

**CHR 9**

**B**

**Supplementary Figure S2.** Carrot linkage maps of population 3242 (A) and 5171 (B).Linkage groups (LGs) were constructed using a LOD value ≥10. LGs were named according to their corresponding chromosomes (CHR). Assignment of the LGs to the chromosomes was done through physical localization of the GBS markers in the annotated carrot genome sequence. Asterisks indicate markers that were significantly distorted from the expected segregation ratio for codominant markers in an F2 or F4 population, at p< 0.005 (*) and p<0.001 (**).


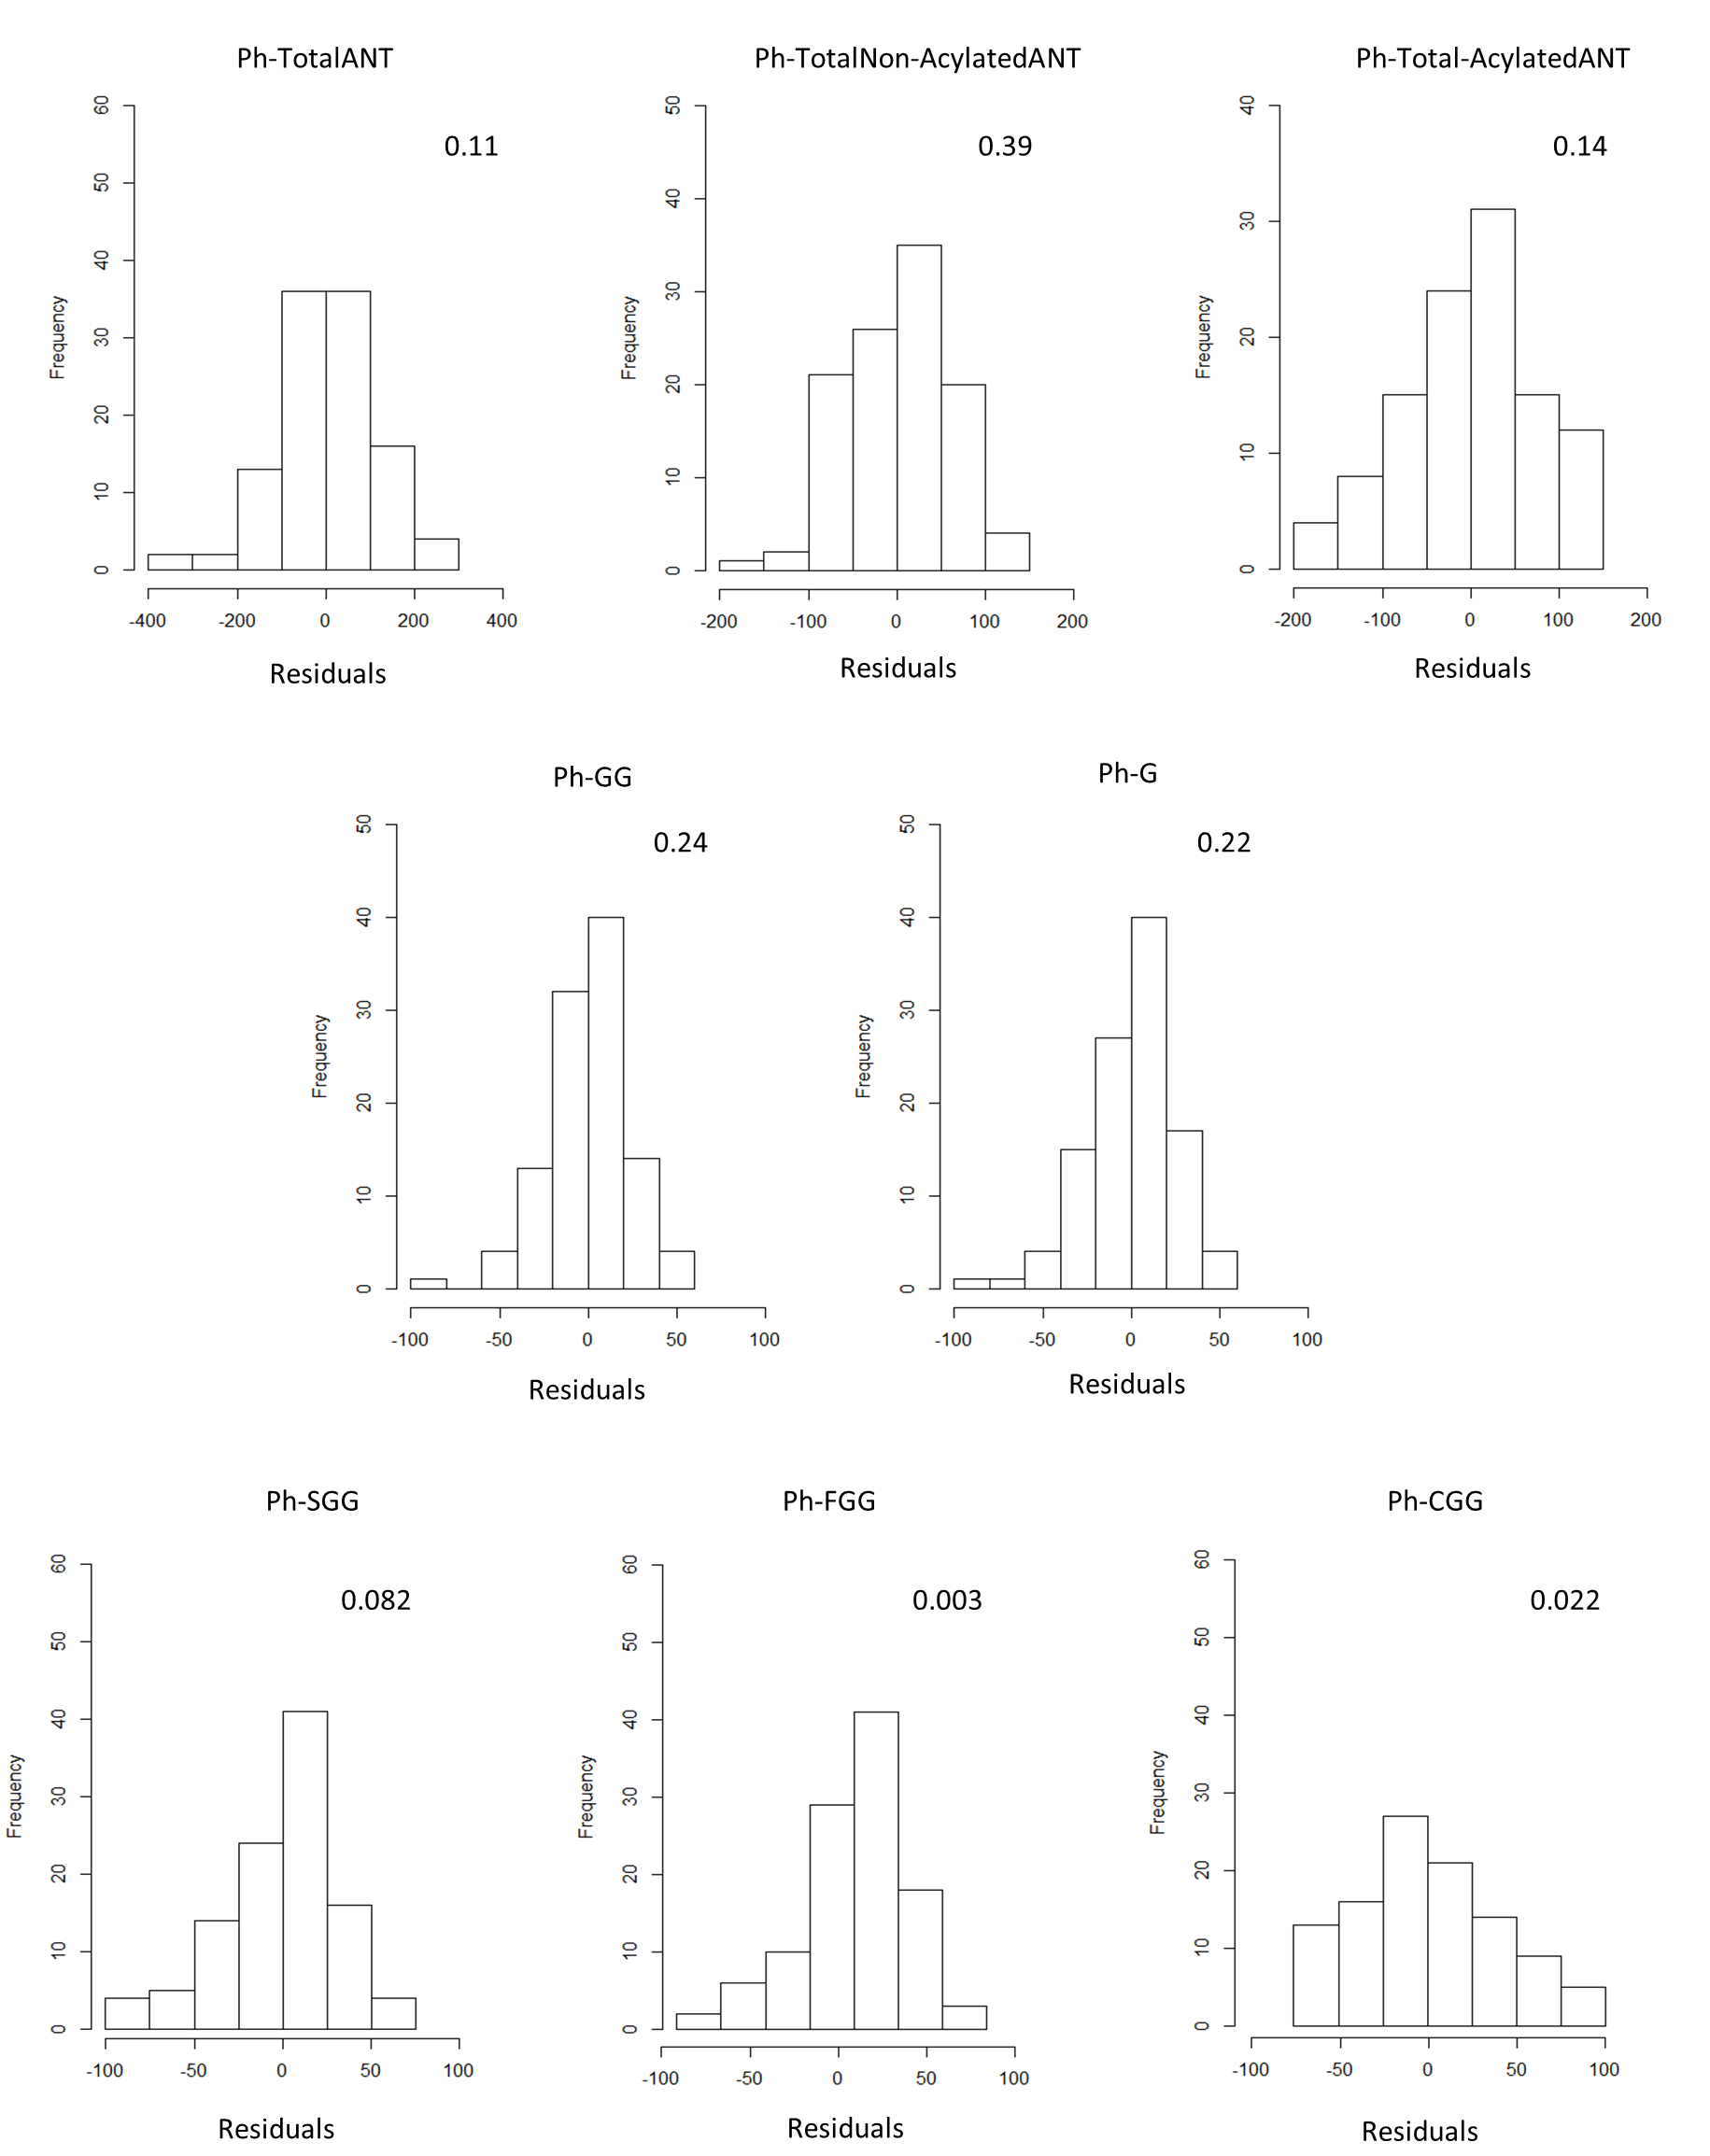


**Supplementary Figure S3.** Relative frequency distributions of residuals of the QTL models for individual and combined phloem anthocyanin pigments. Normality on the residuals was tested by Shapiro-Wilk test and p-values are shown next to each histogram. ANT: anthocyanins


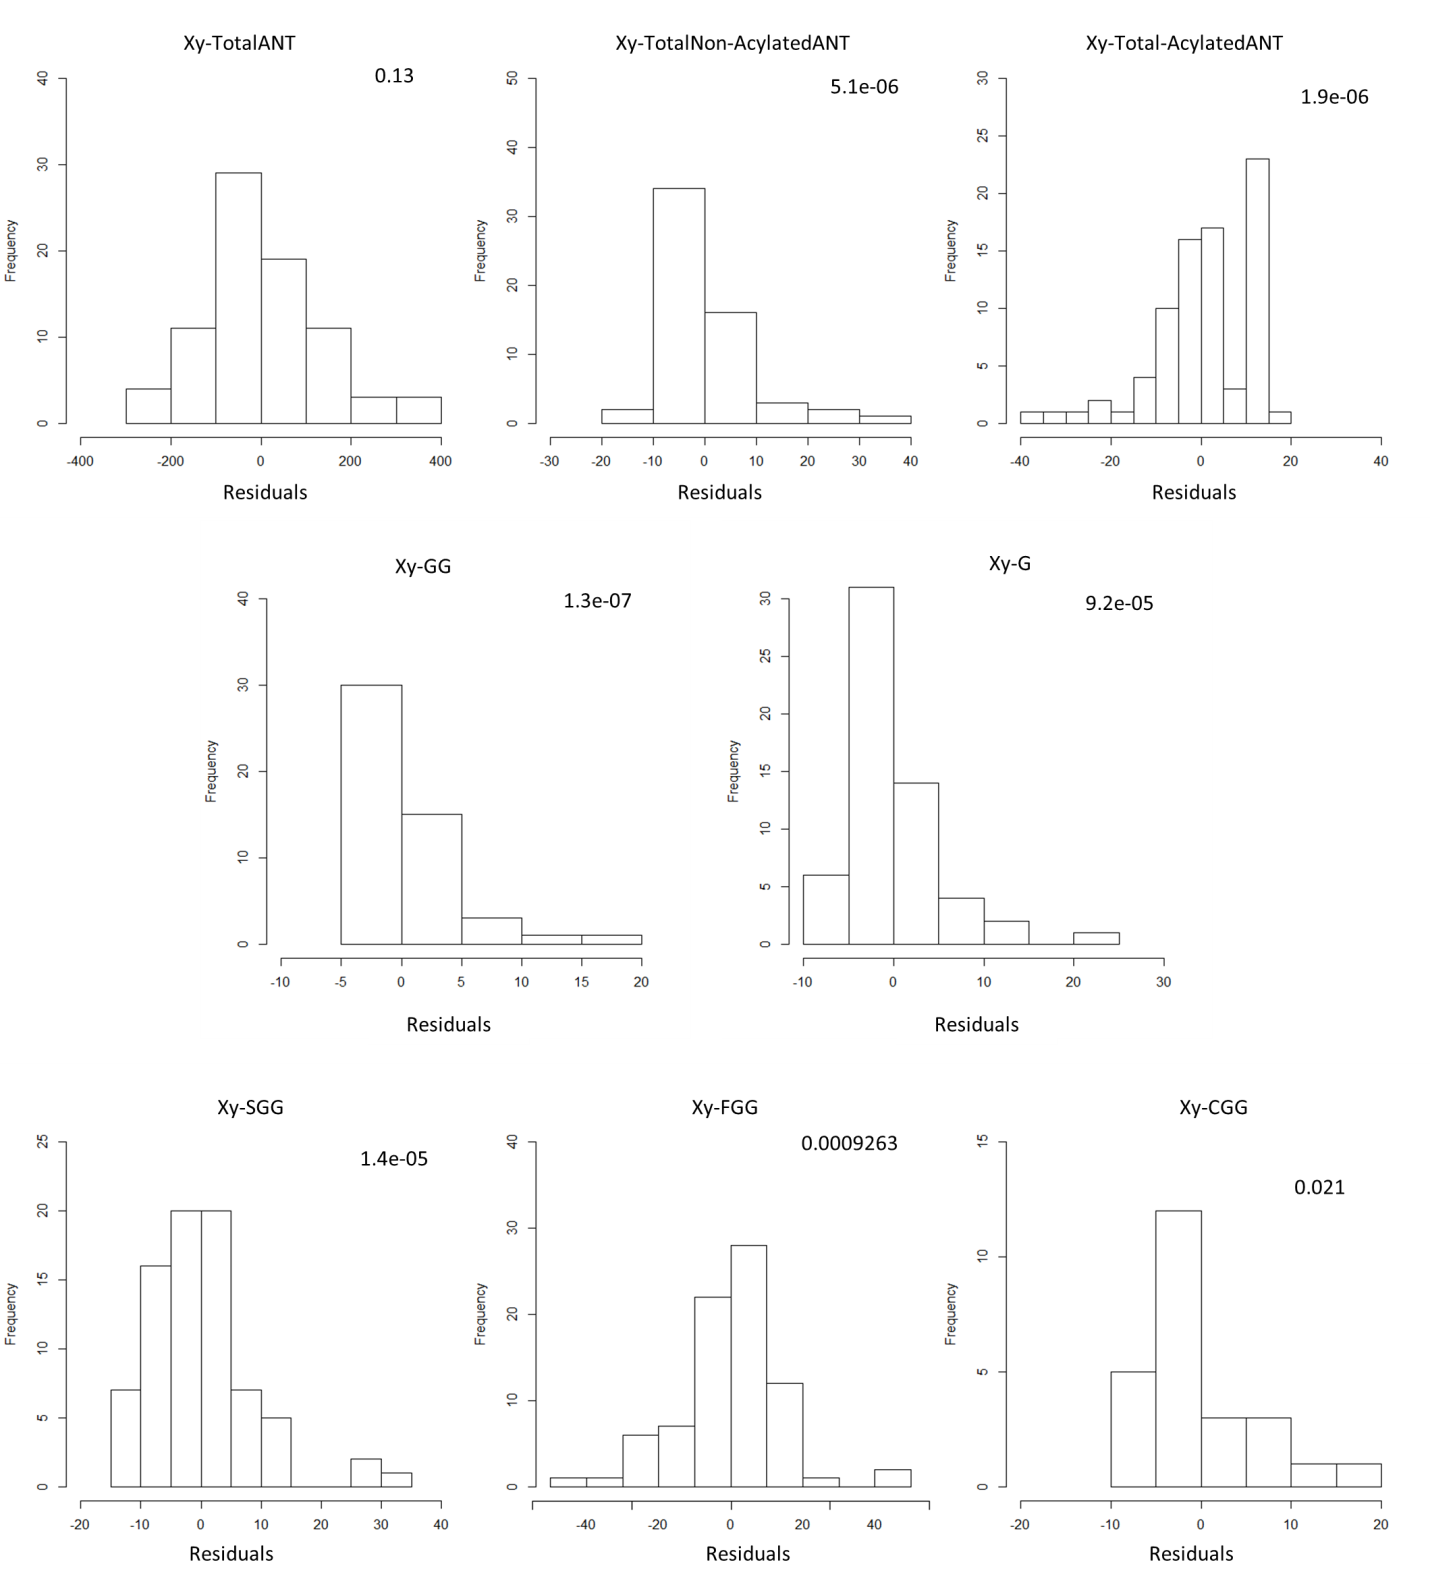


**Supplementary Figure S4.** Relative frequency distributions of residuals of the QTL models for individual and combined xylem anthocyanin pigments. Normality on the residuals was tested by Shapiro-Wilk test and p-values are shown next to each histogram. ANT: anthocyanins


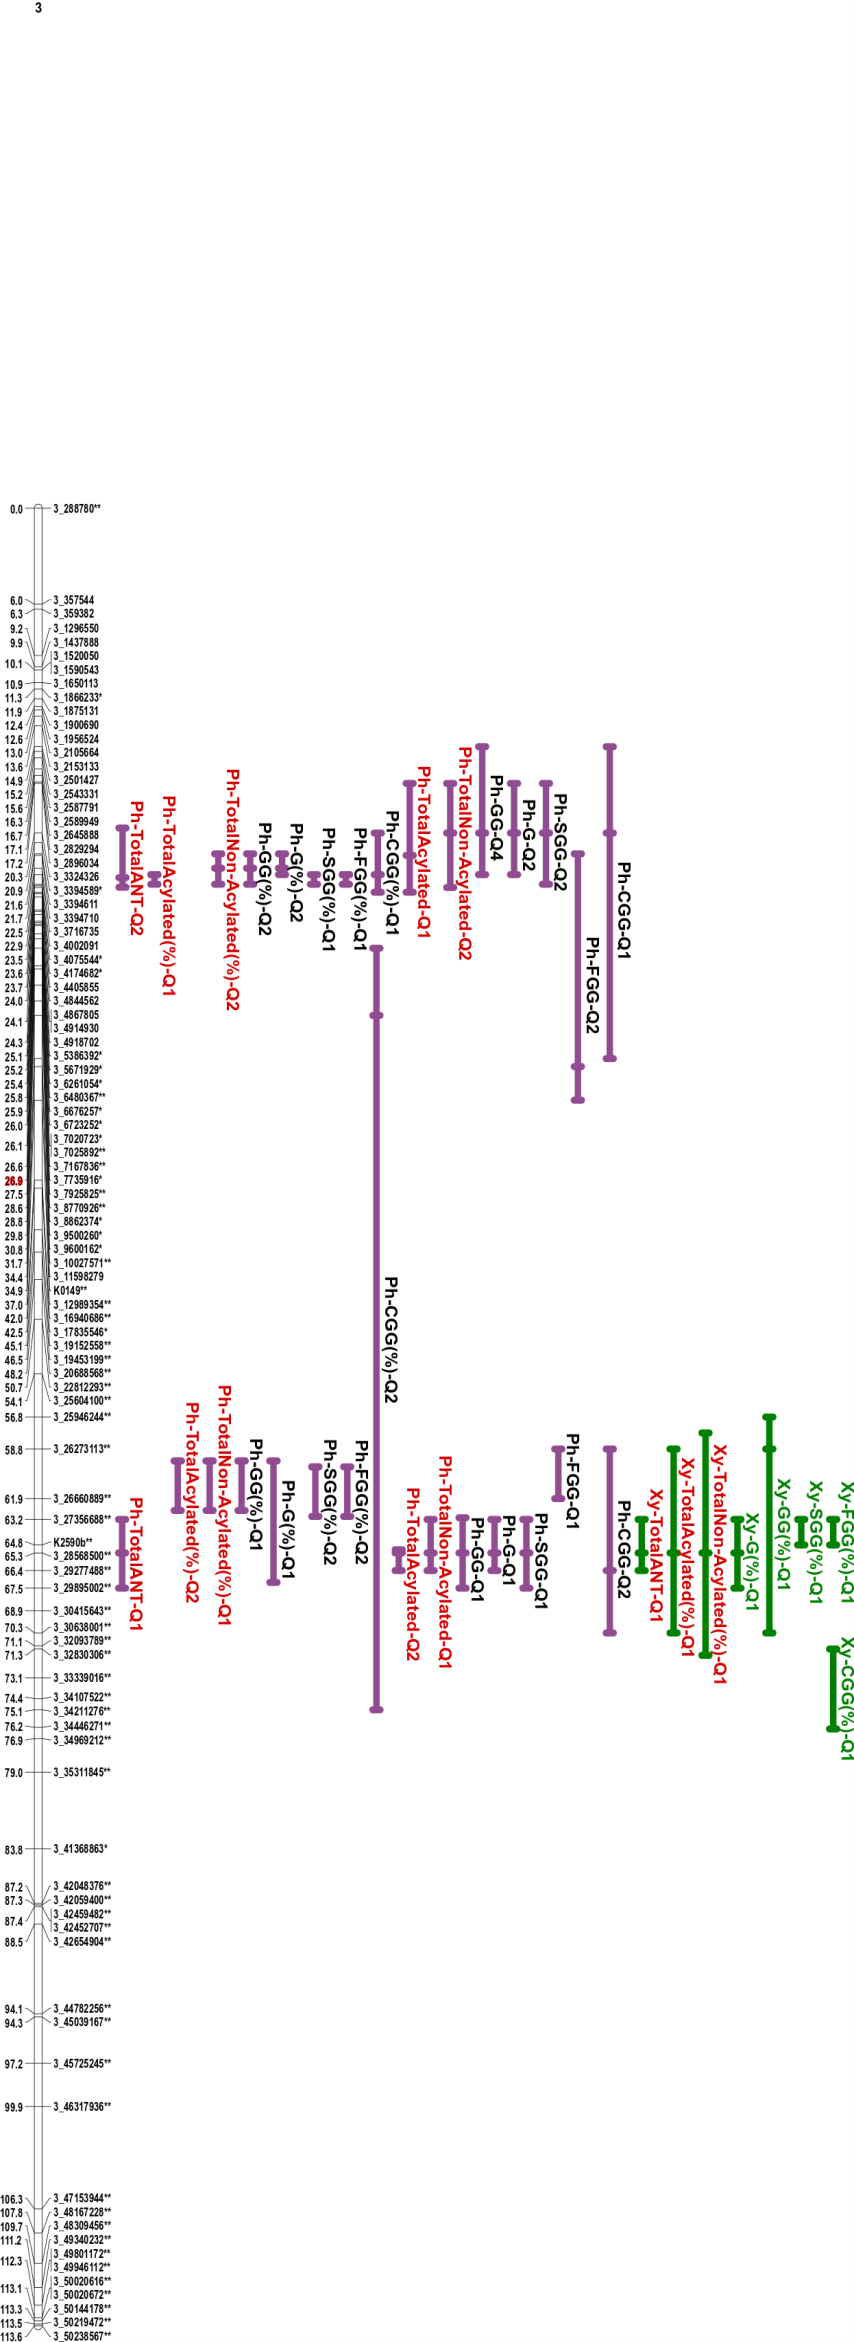


**CHR 3**

**Supplementary Figure S5.** Genetic mapping of QTL for concentration of individual and combined anthocyanin pigments present in the root phloem of population 3242, obtained with the multiple imputation method. QTL for individual (in black font) and combined (in red font) anthocyanin pigments present in the root phloem are indicated on the right of the LG, with each bar indicating the 1.5 LOD interval and the position of the maximum LOD value for the QTL. QTL were named with the root tissue (Ph=phloem) followed by the abbreviated quantitative trait (as described in Table 2) and the QTL number for that trait (for a given trait, QTL were numbered in decreasing order based on their explanatory power).


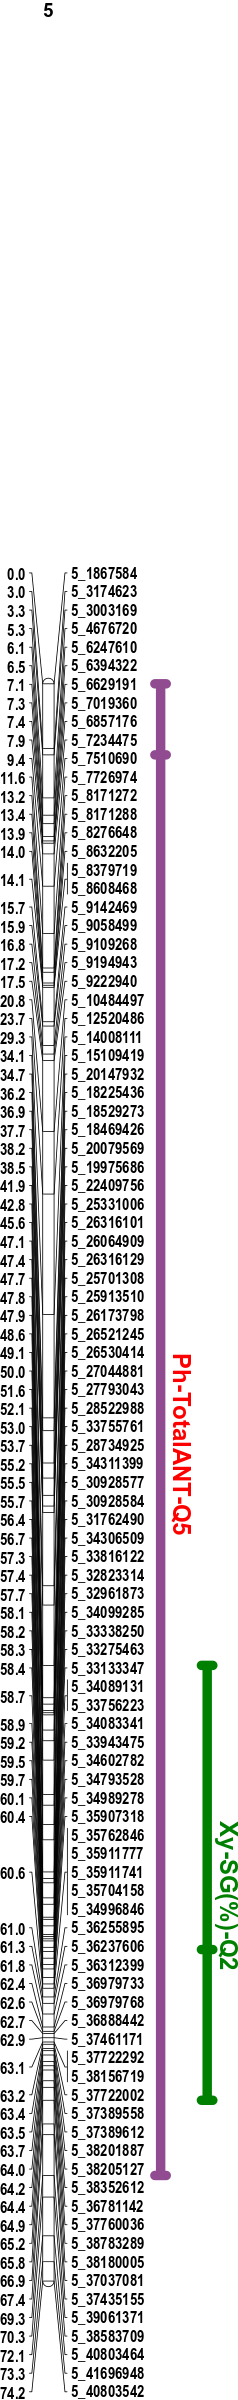

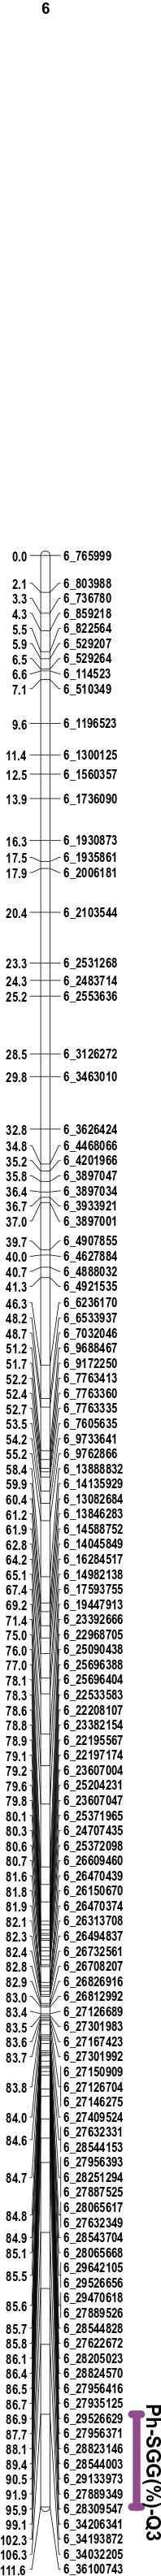

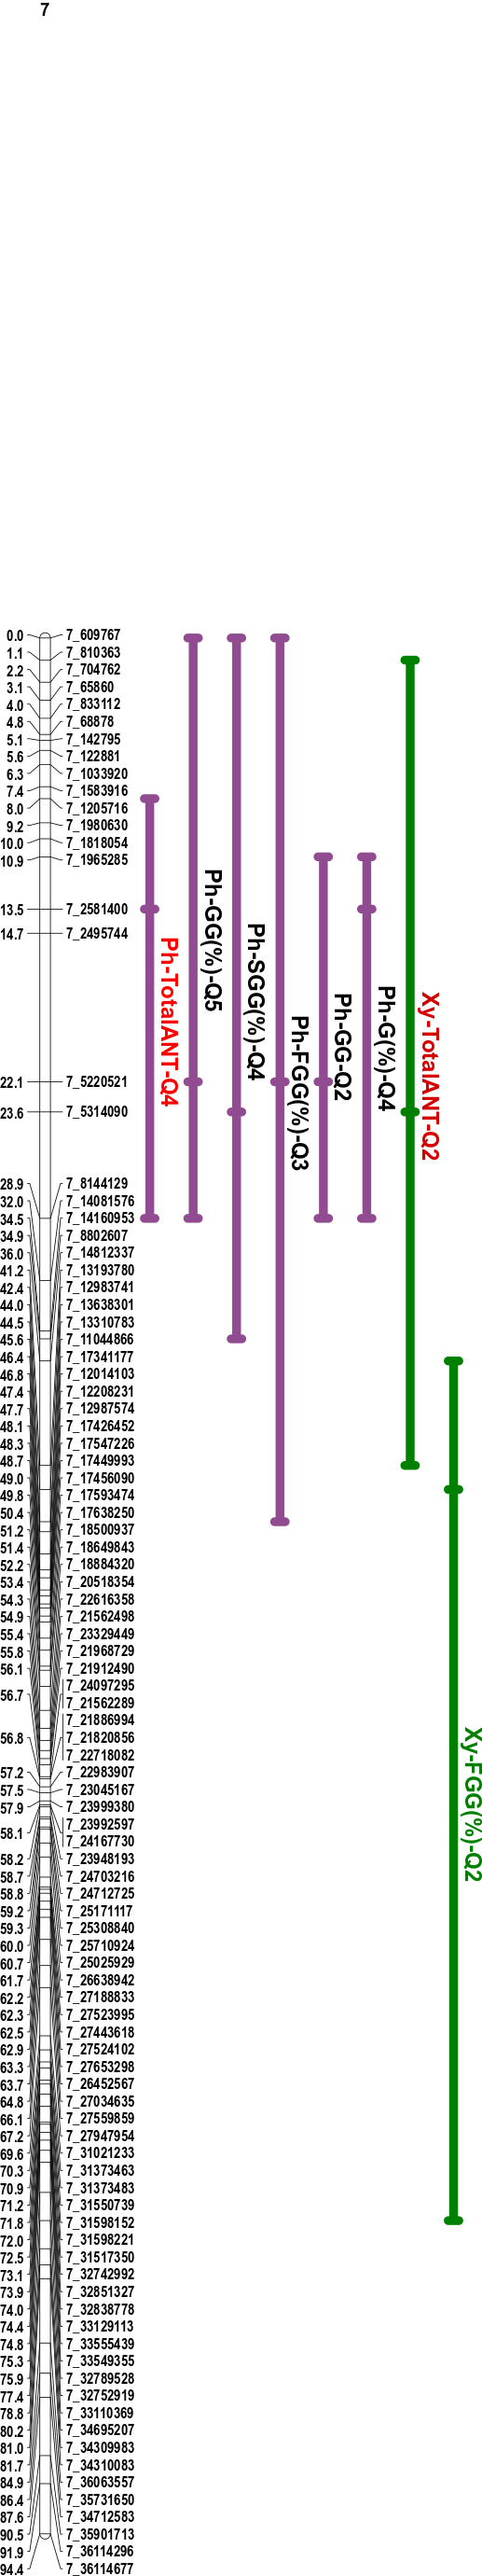

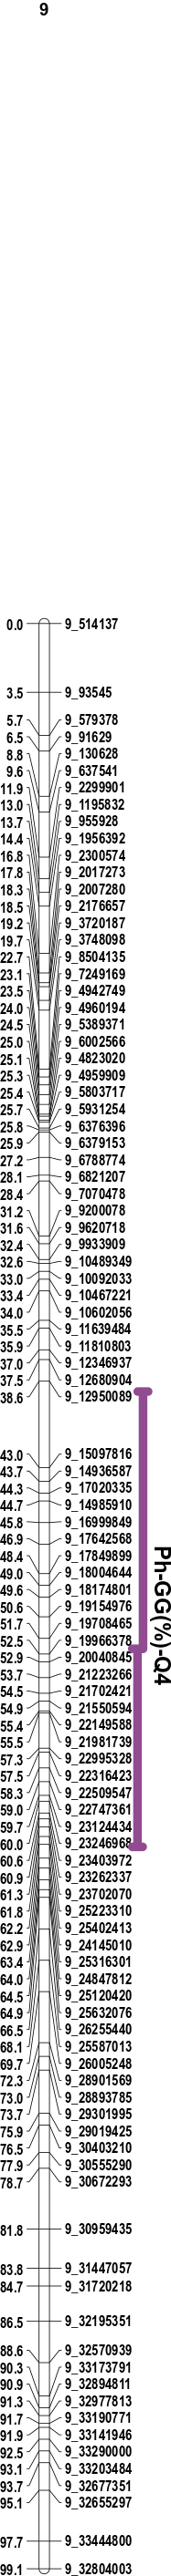

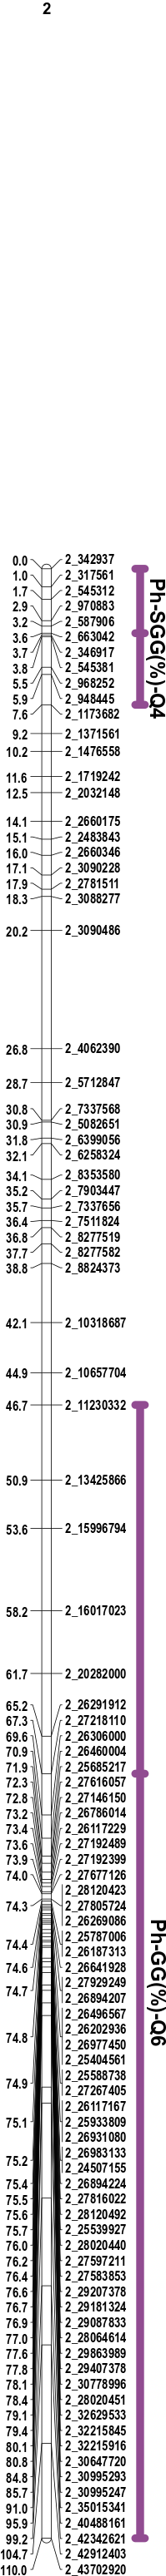

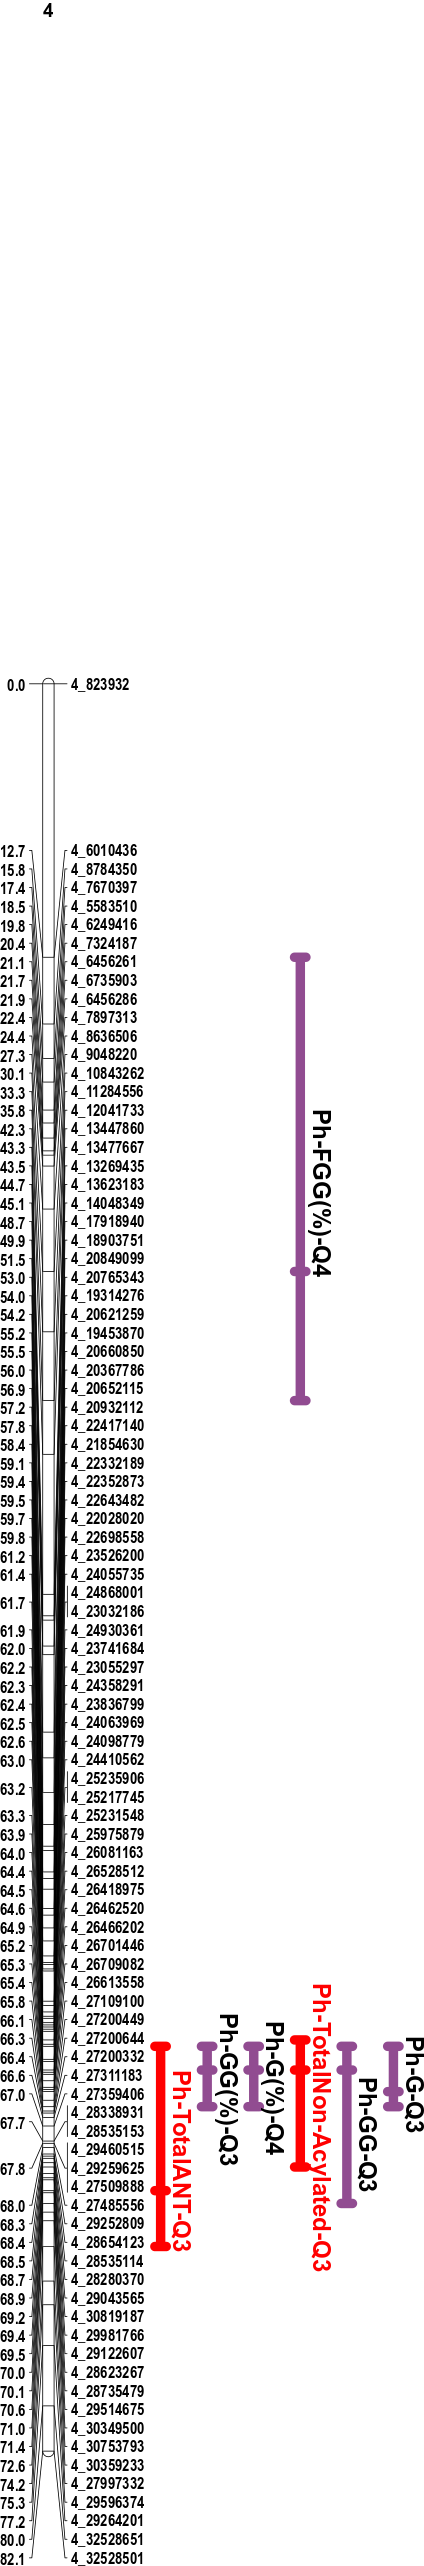


**CHR 2**

**CHR 4**

**CHR 5**

**CHR 7**

**CHR 6**

**CHR 9**

**Supplementary Figure S5** - Continued


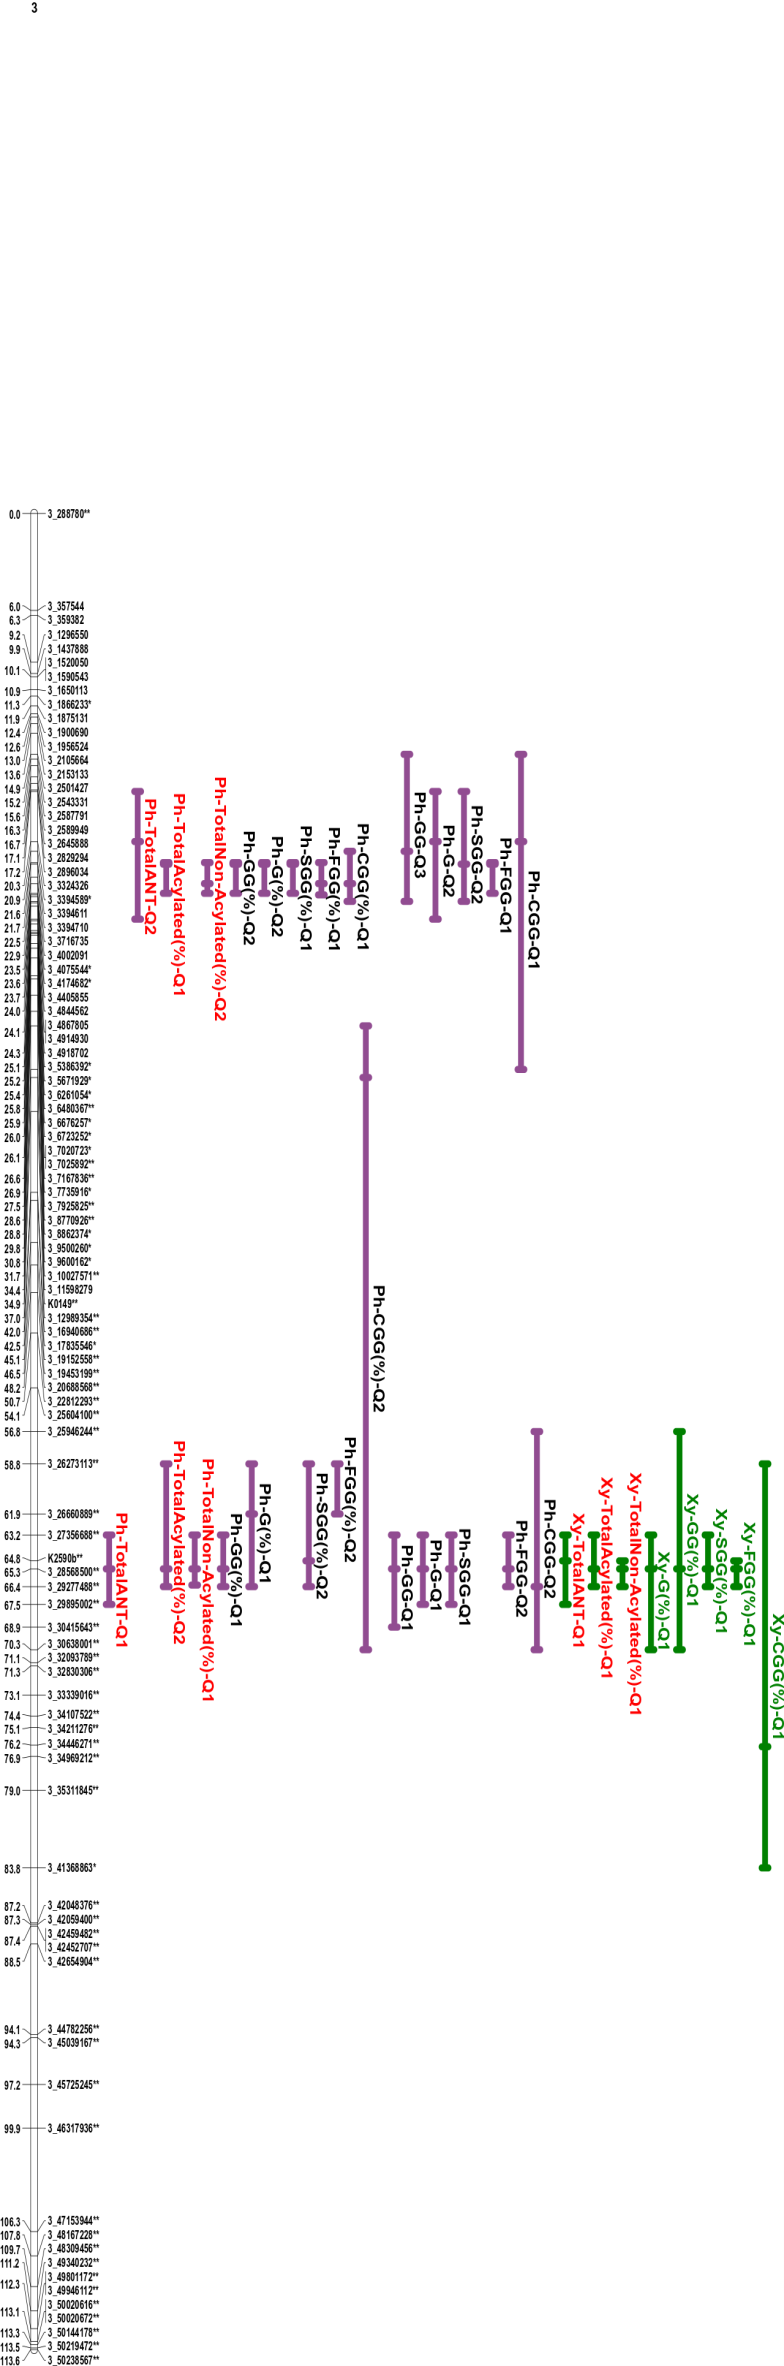


**CHR 3**

**Supplementary Figure S6.** Genetic mapping of QTL for concentration of individual and combined anthocyanin pigments present in the root phloem of population 3242, obtained with the Haley Knott regression method. QTL for individual (in black font) and combined (in red font) anthocyanin pigments present in the root phloem are indicated on the right of the LG, with each bar indicating the 1.5 LOD interval and the position of the maximum LOD value for the QTL. QTL were named with the root tissue (Ph=phloem) followed by the abbreviated quantitative trait (as described in Table 2) and the QTL number for that trait (for a given trait, QTL were numbered in decreasing order based on their explanatory power).


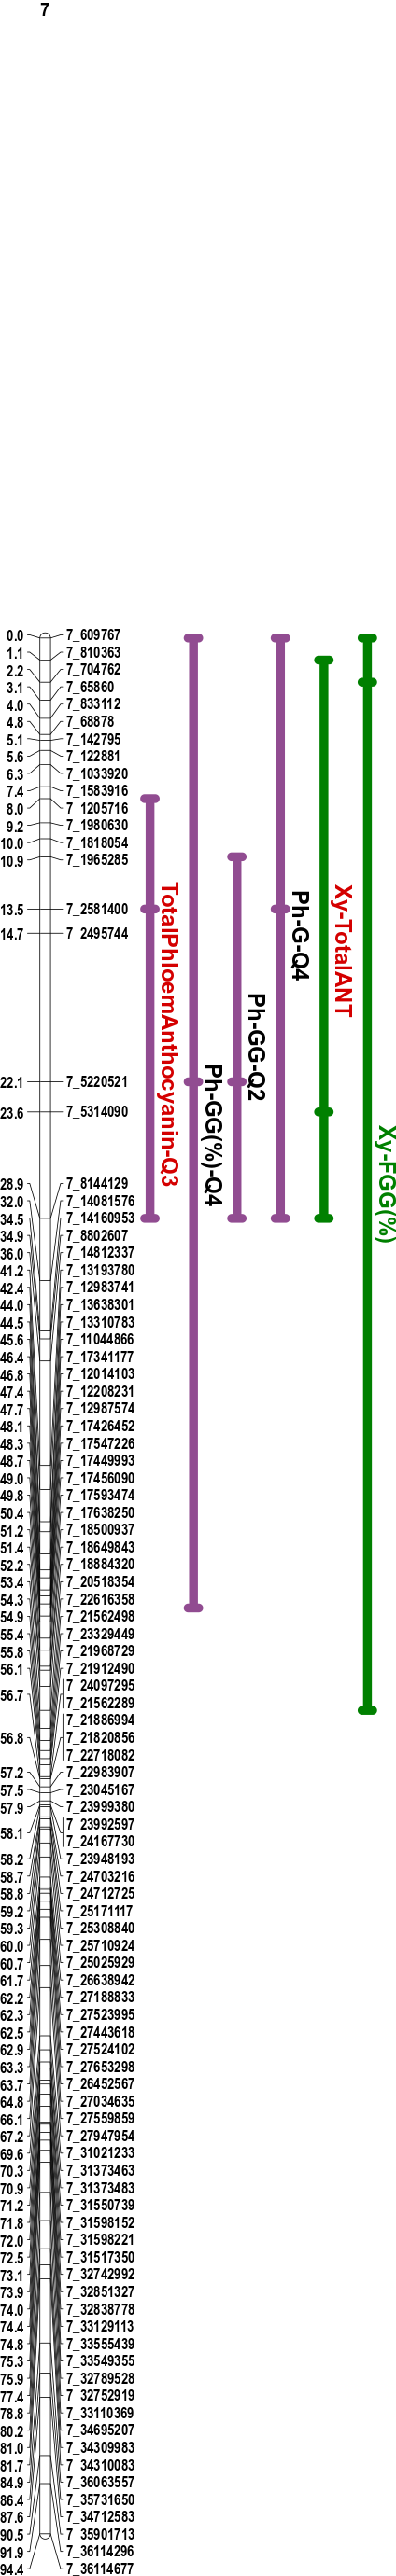

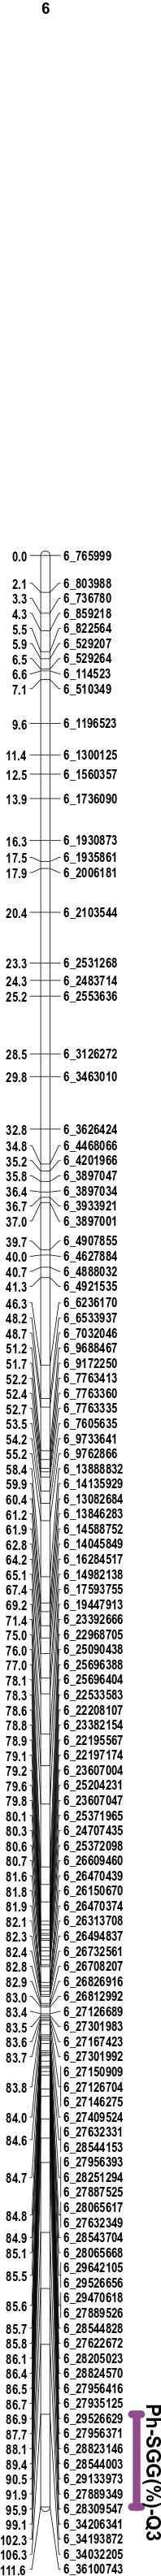

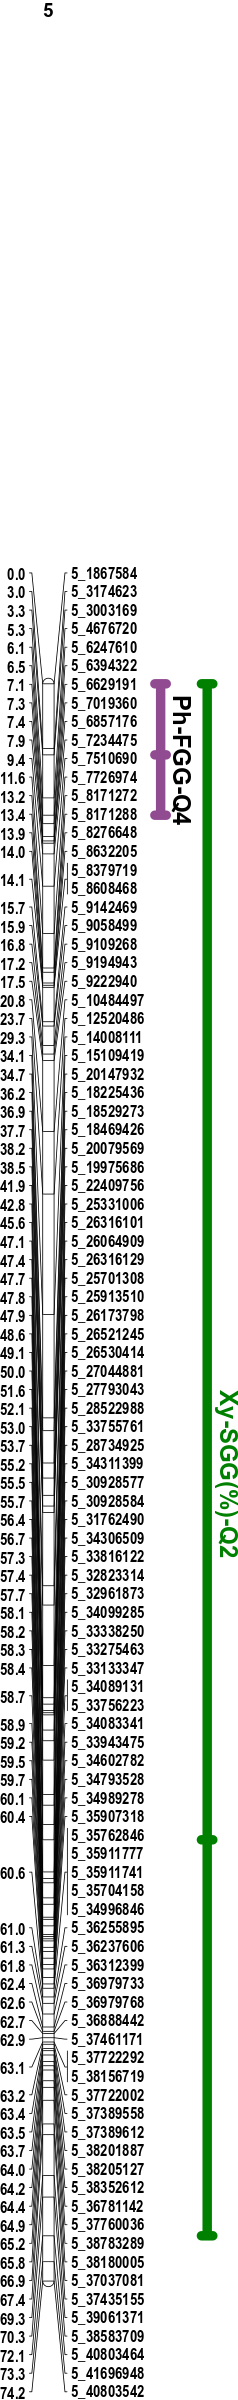

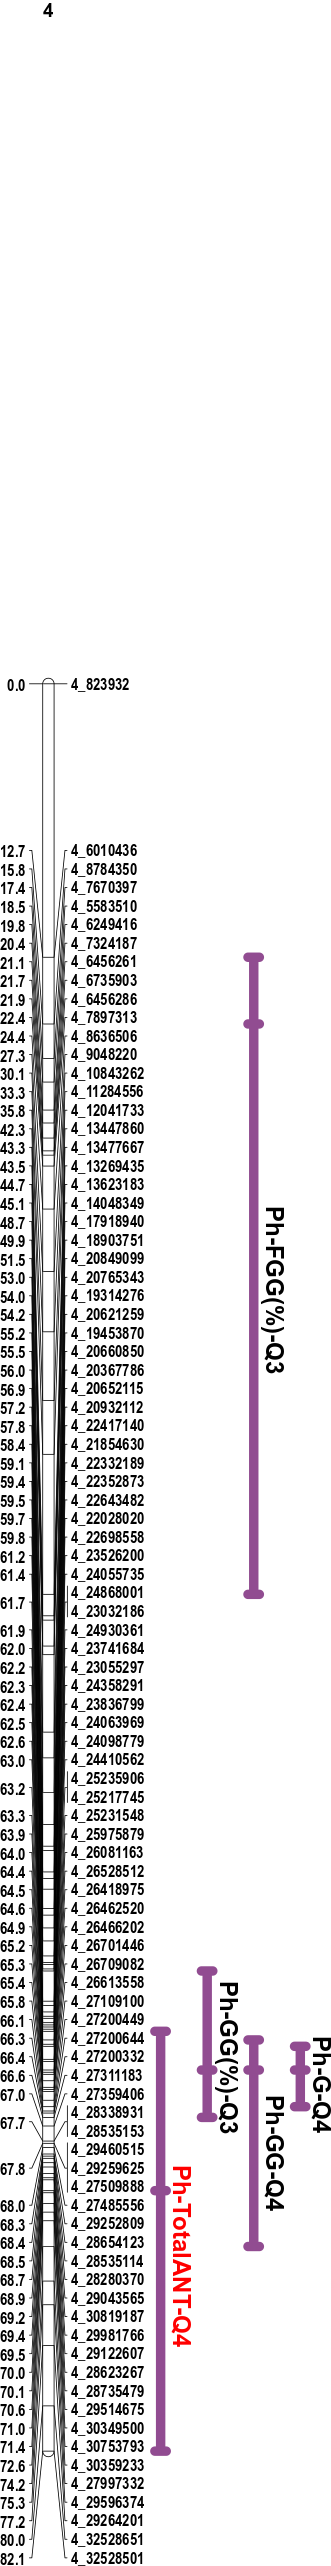

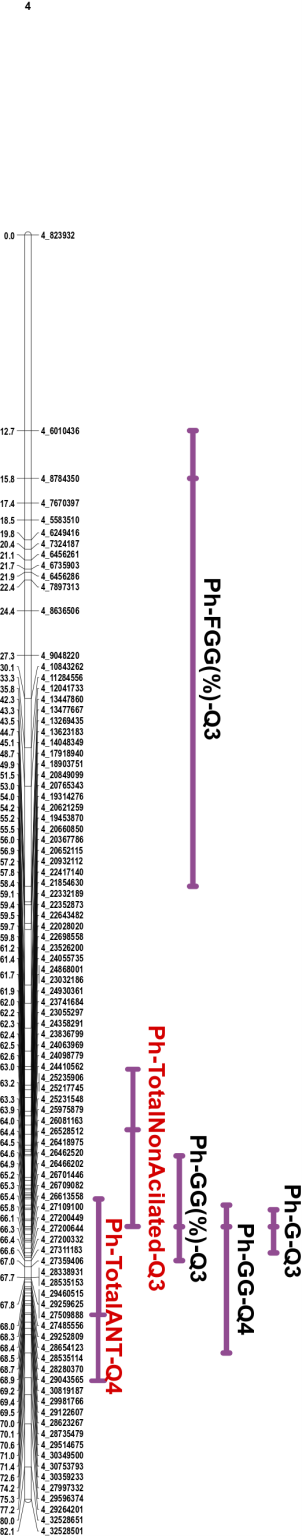


**CHR 4**

**CHR 5 CHR 6 CHR 7**

**Supplementary Figure S6** – Continued


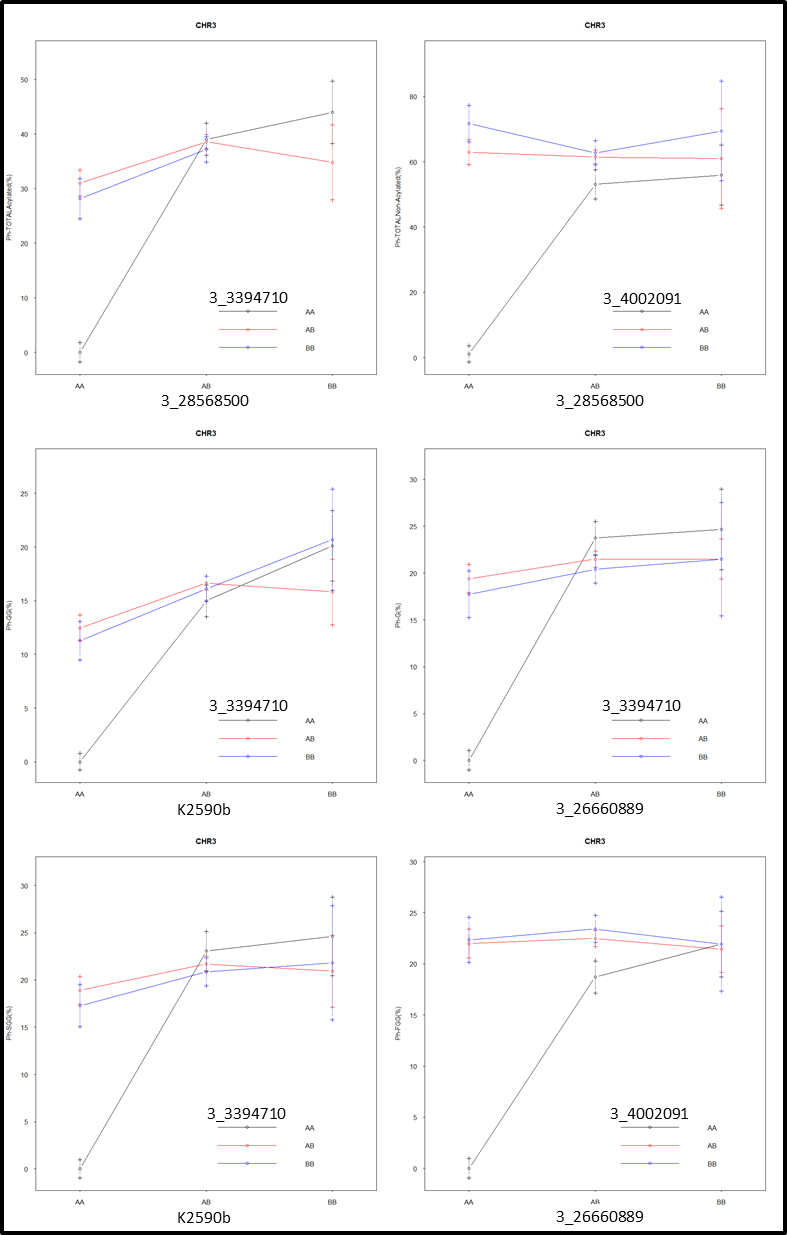


**Ph-SGG(%)**

**Ph-FGG(%)**

**Ph-G(%)**

**Ph-GG(%)**

**Ph-Total AA (%)**

**Ph-Total NAA (%)**

**Supplementary Figure S7-A.** Marker effect plots for QTL for phloem (Ph) anthocyanins with significant interaction. NAA. Non-acylated anthocyanins; AA. Acylated anthocyanins.

Ph-TotalNon-Acylated(%)-Q1


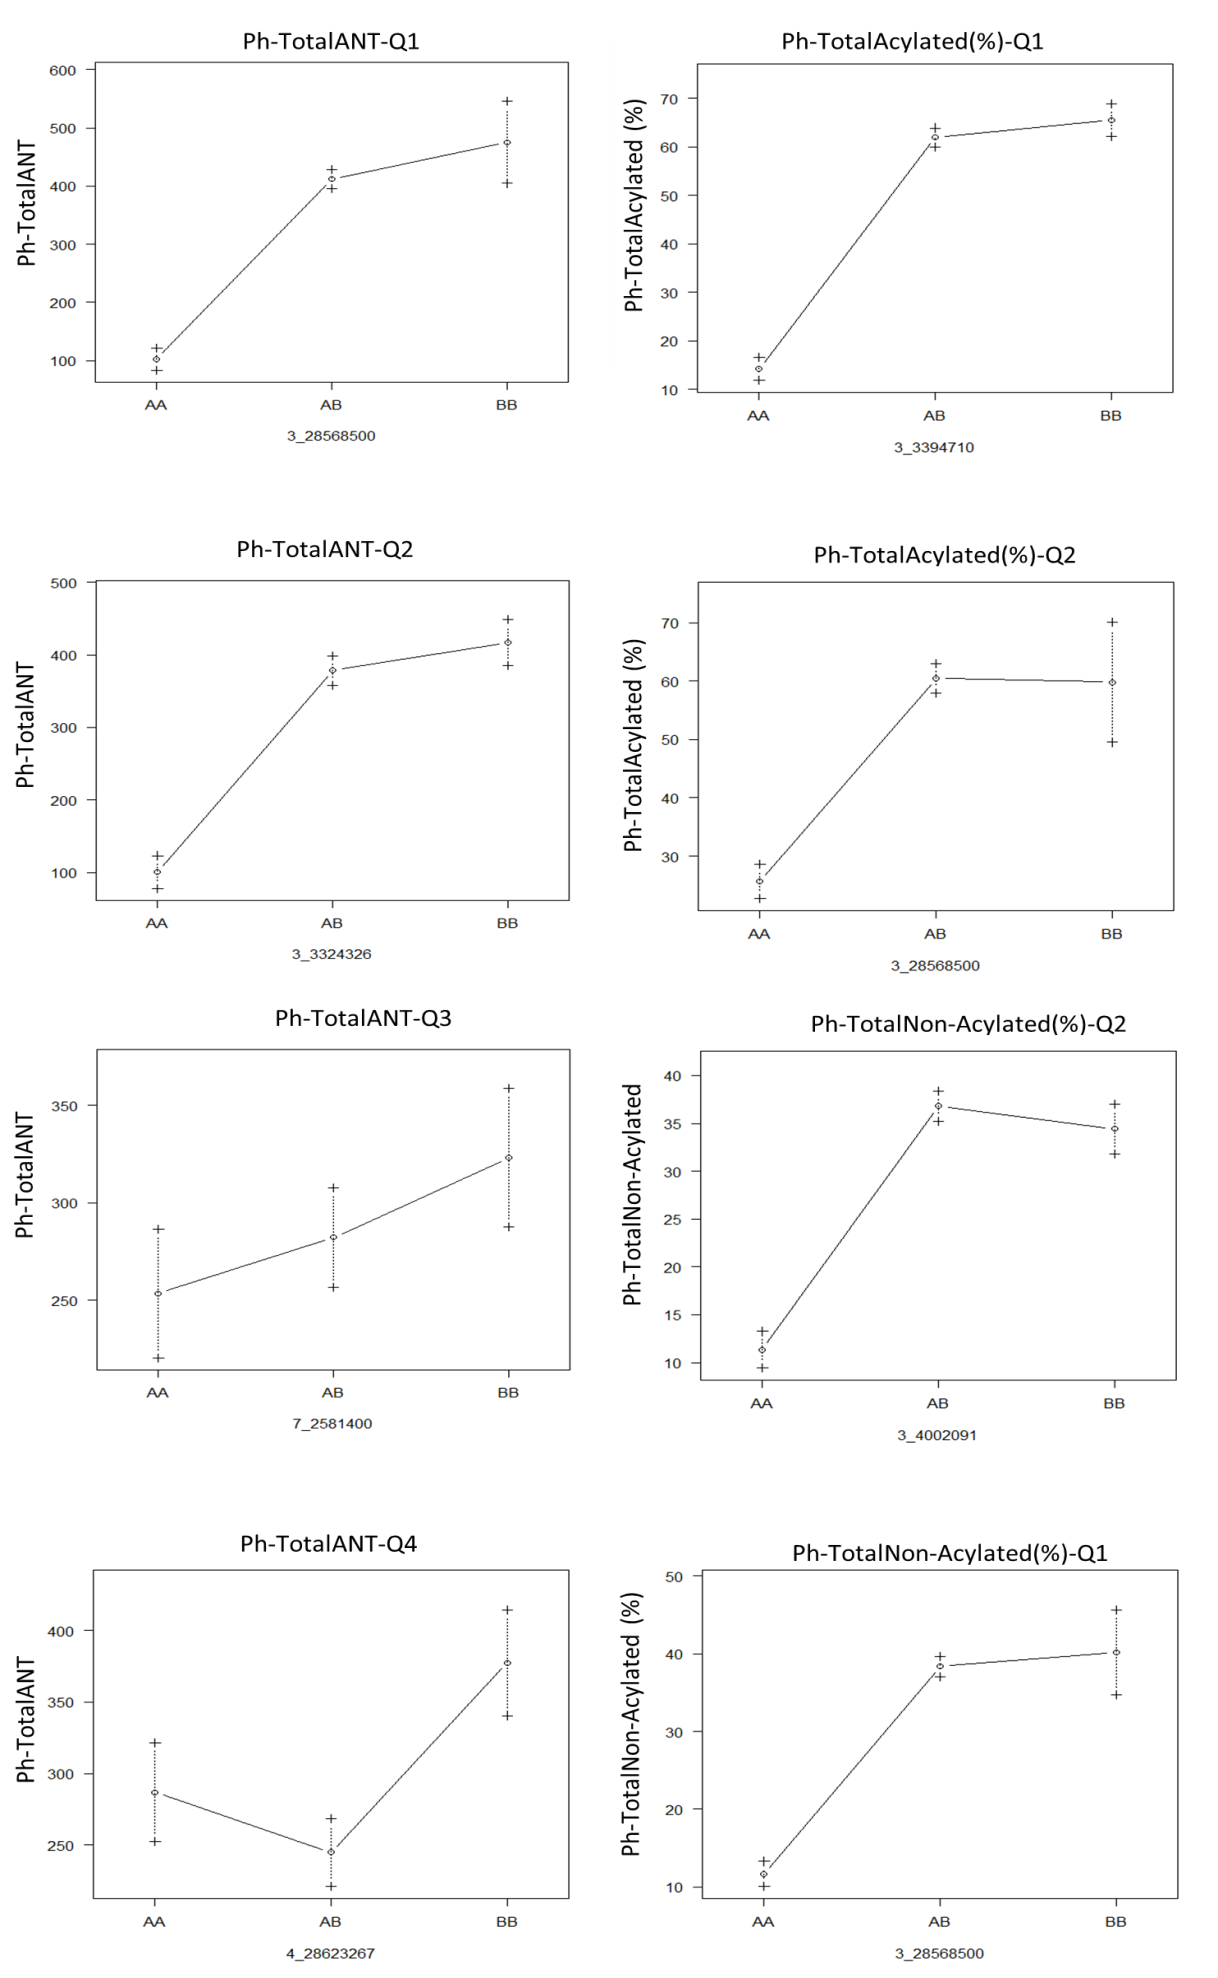


**Supplementary Figure S7-B.** Marker effect plots for significant QTL for phloem (Ph) and xylem (Xy) anthocyanin content. QTL were named with the root tissue (Ph=phloem, Xy=xylem) followed by the abbreviated quantitative trait (as described in Table 2) and the QTL number for that trait (for a given trait, QTL were numbered in decreasing order based on their explanatory power), as described in Table 3.


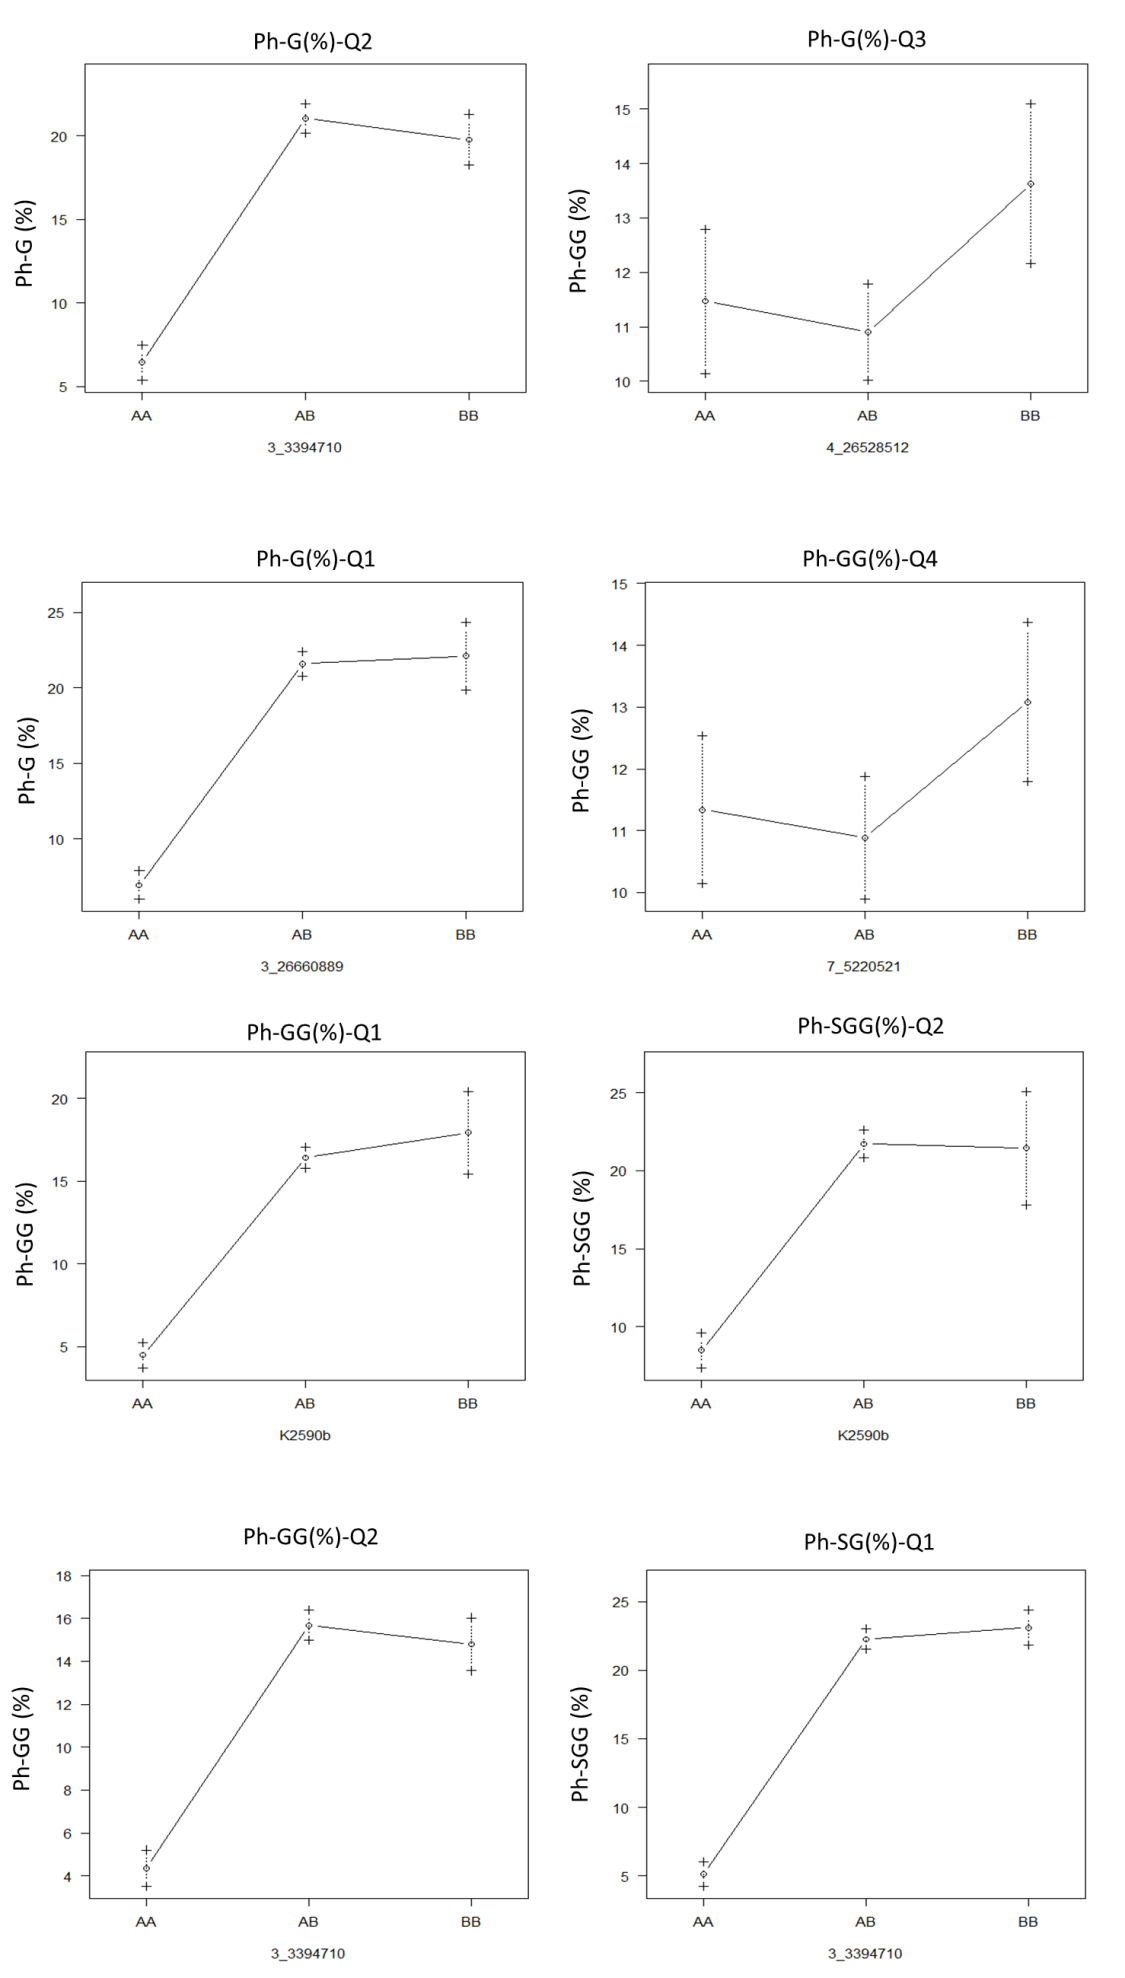


**Supplementary Figure S7-B. -**Continued


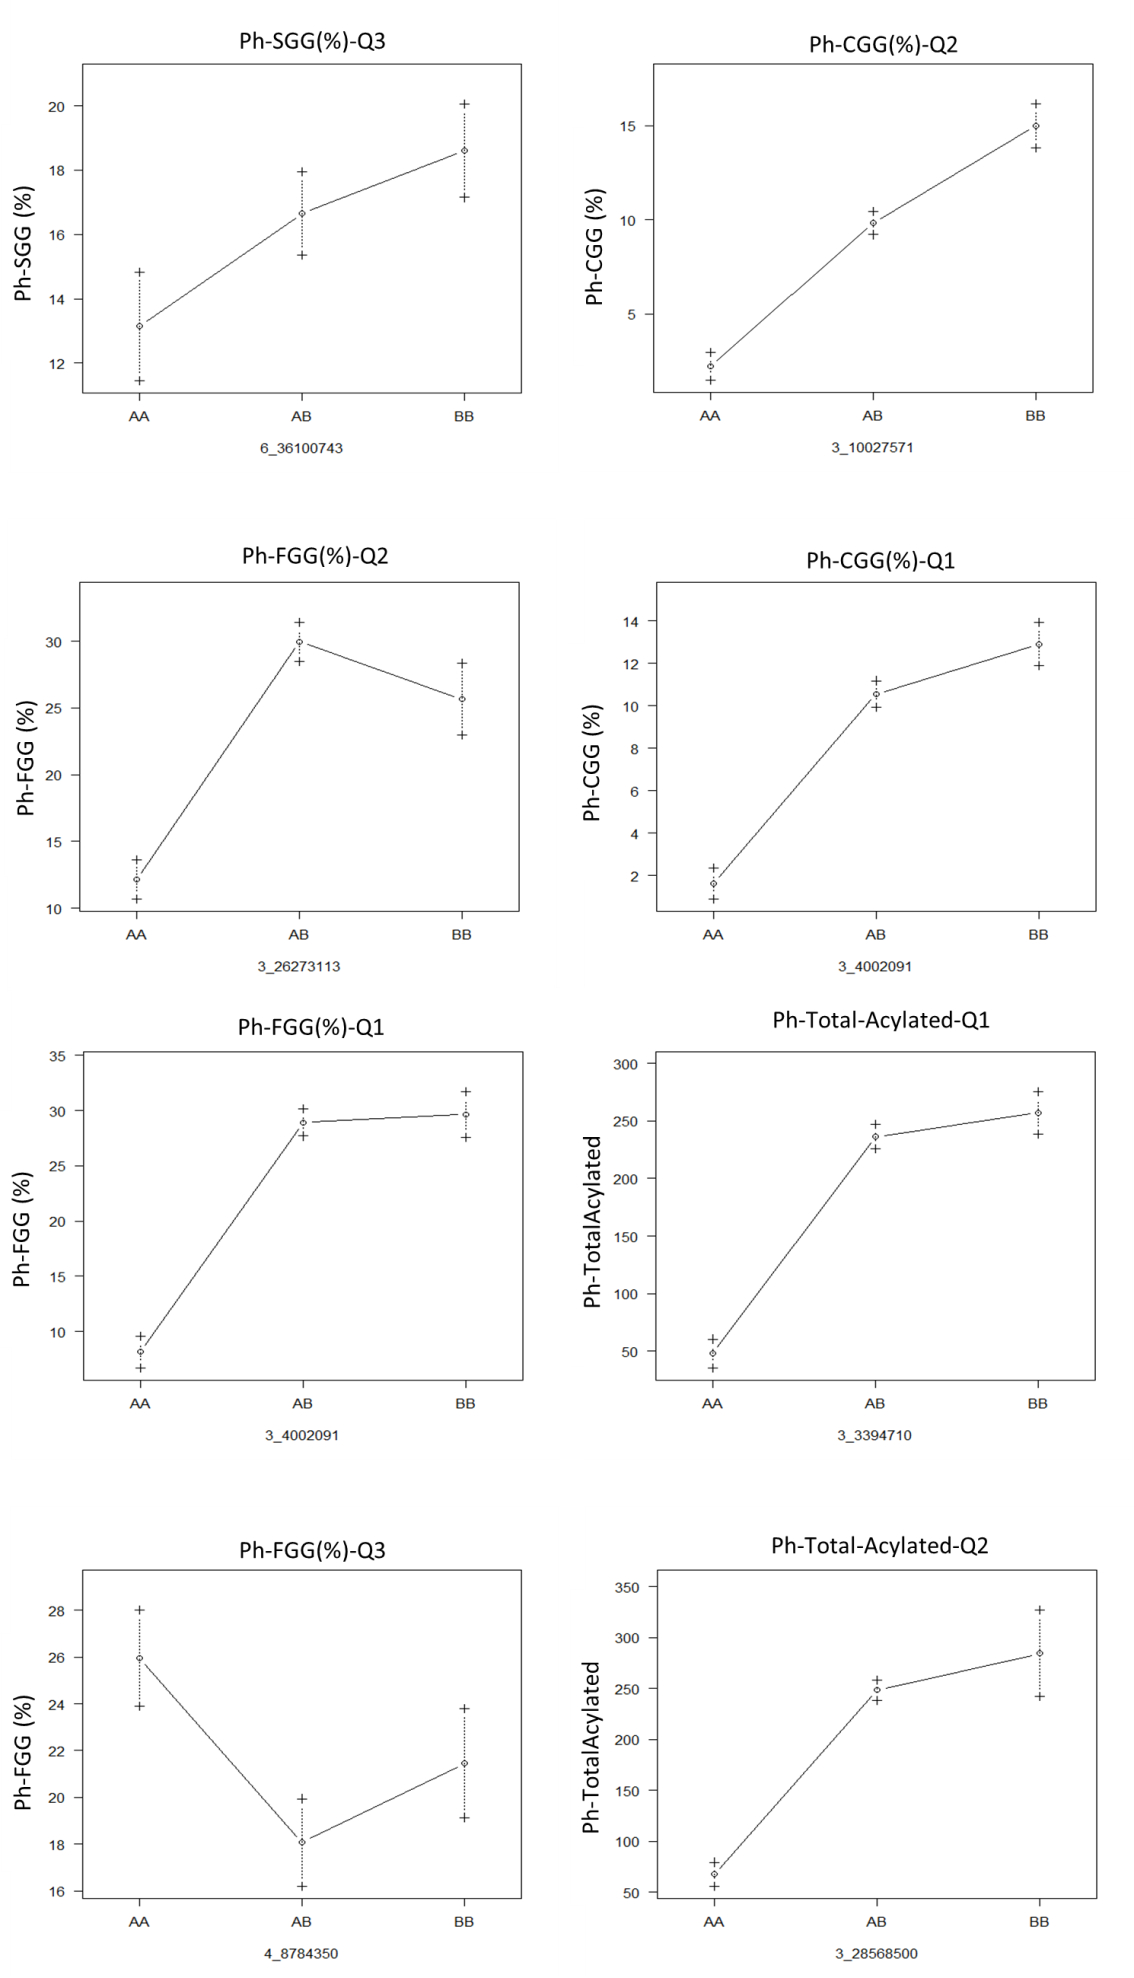


**Supplementry Figure S7-B.** -Continued


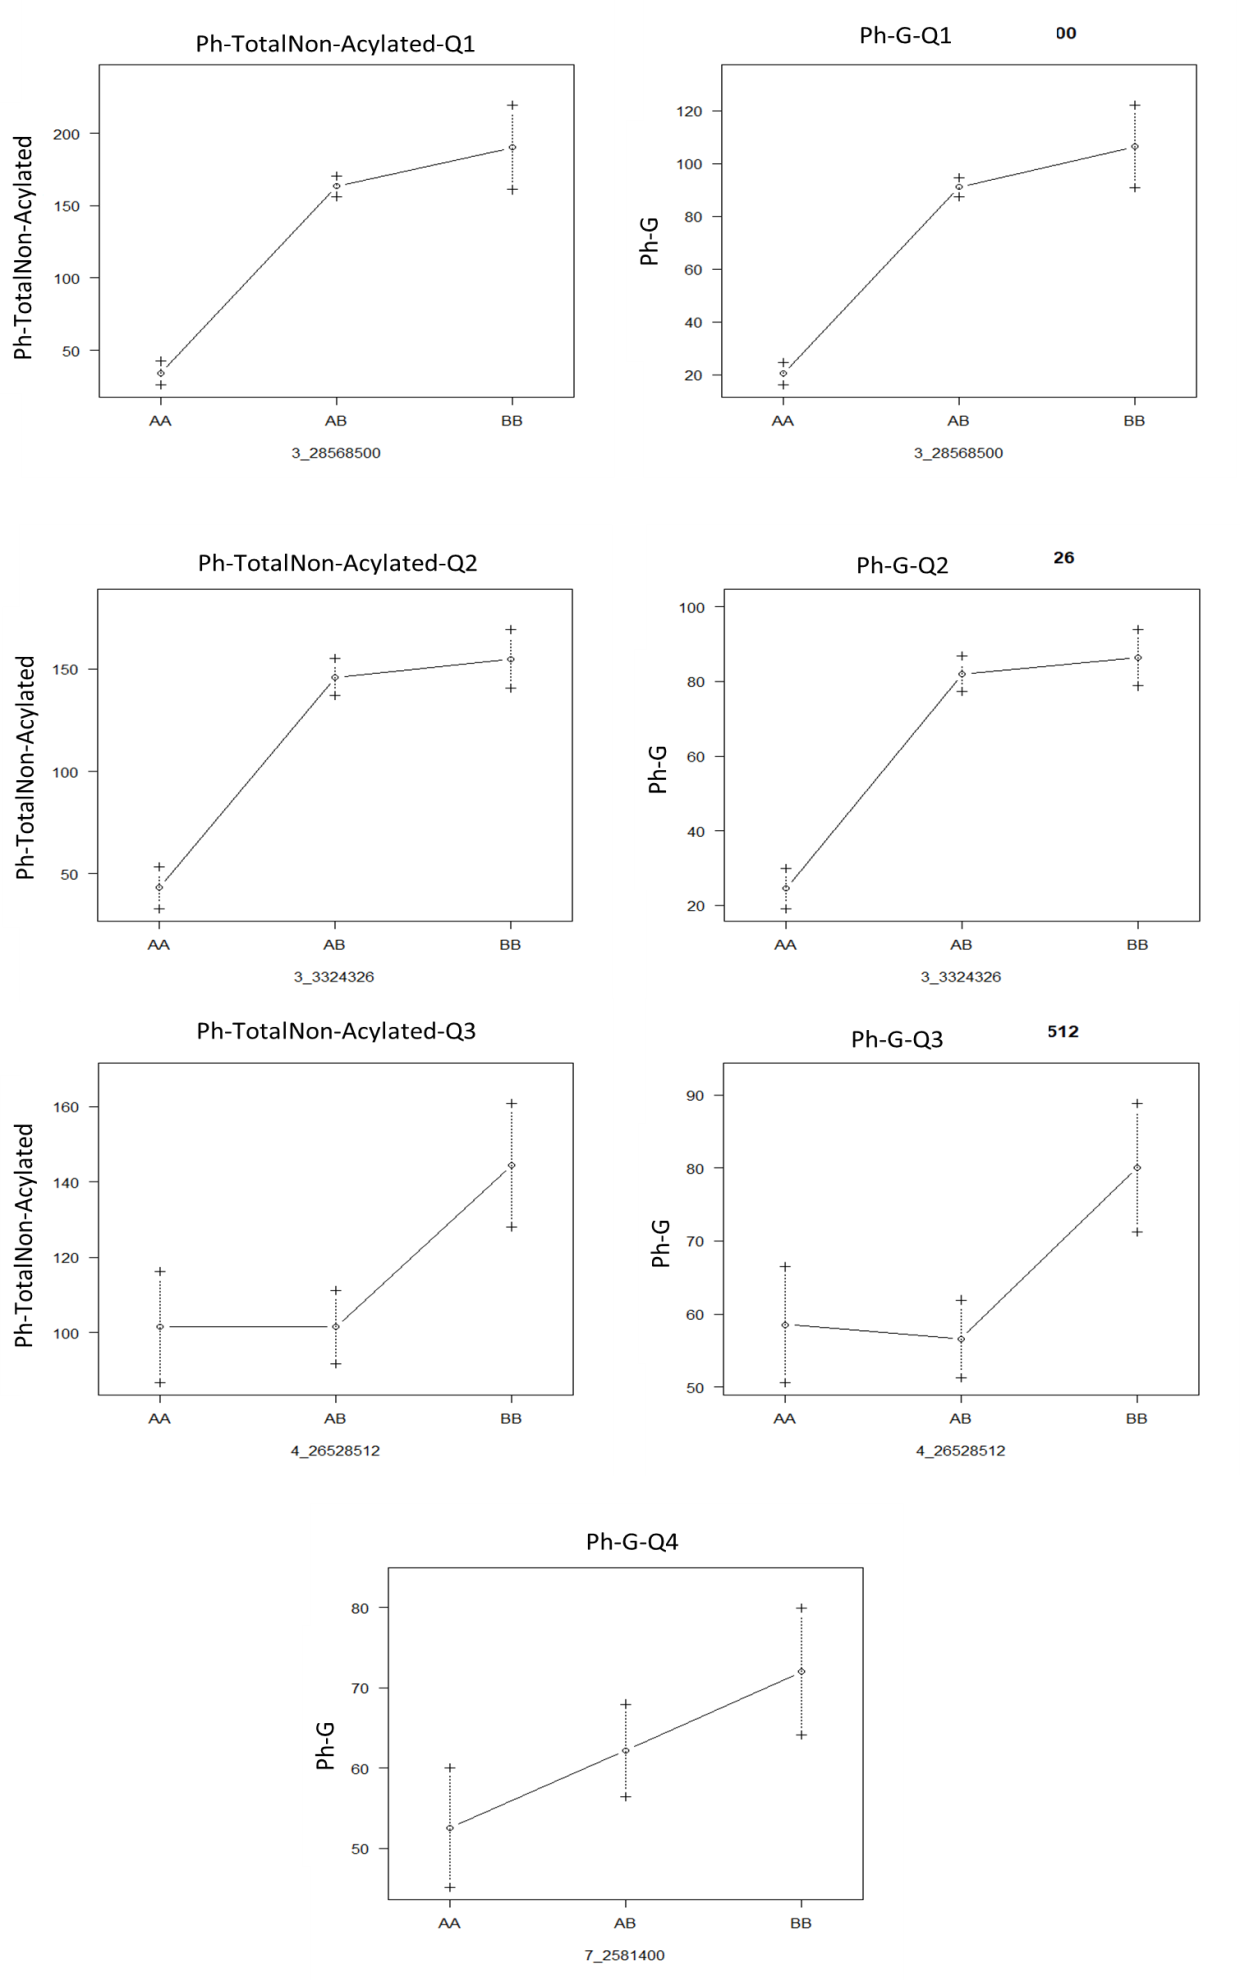


**Supplementry Figure S7-B.** -Continued


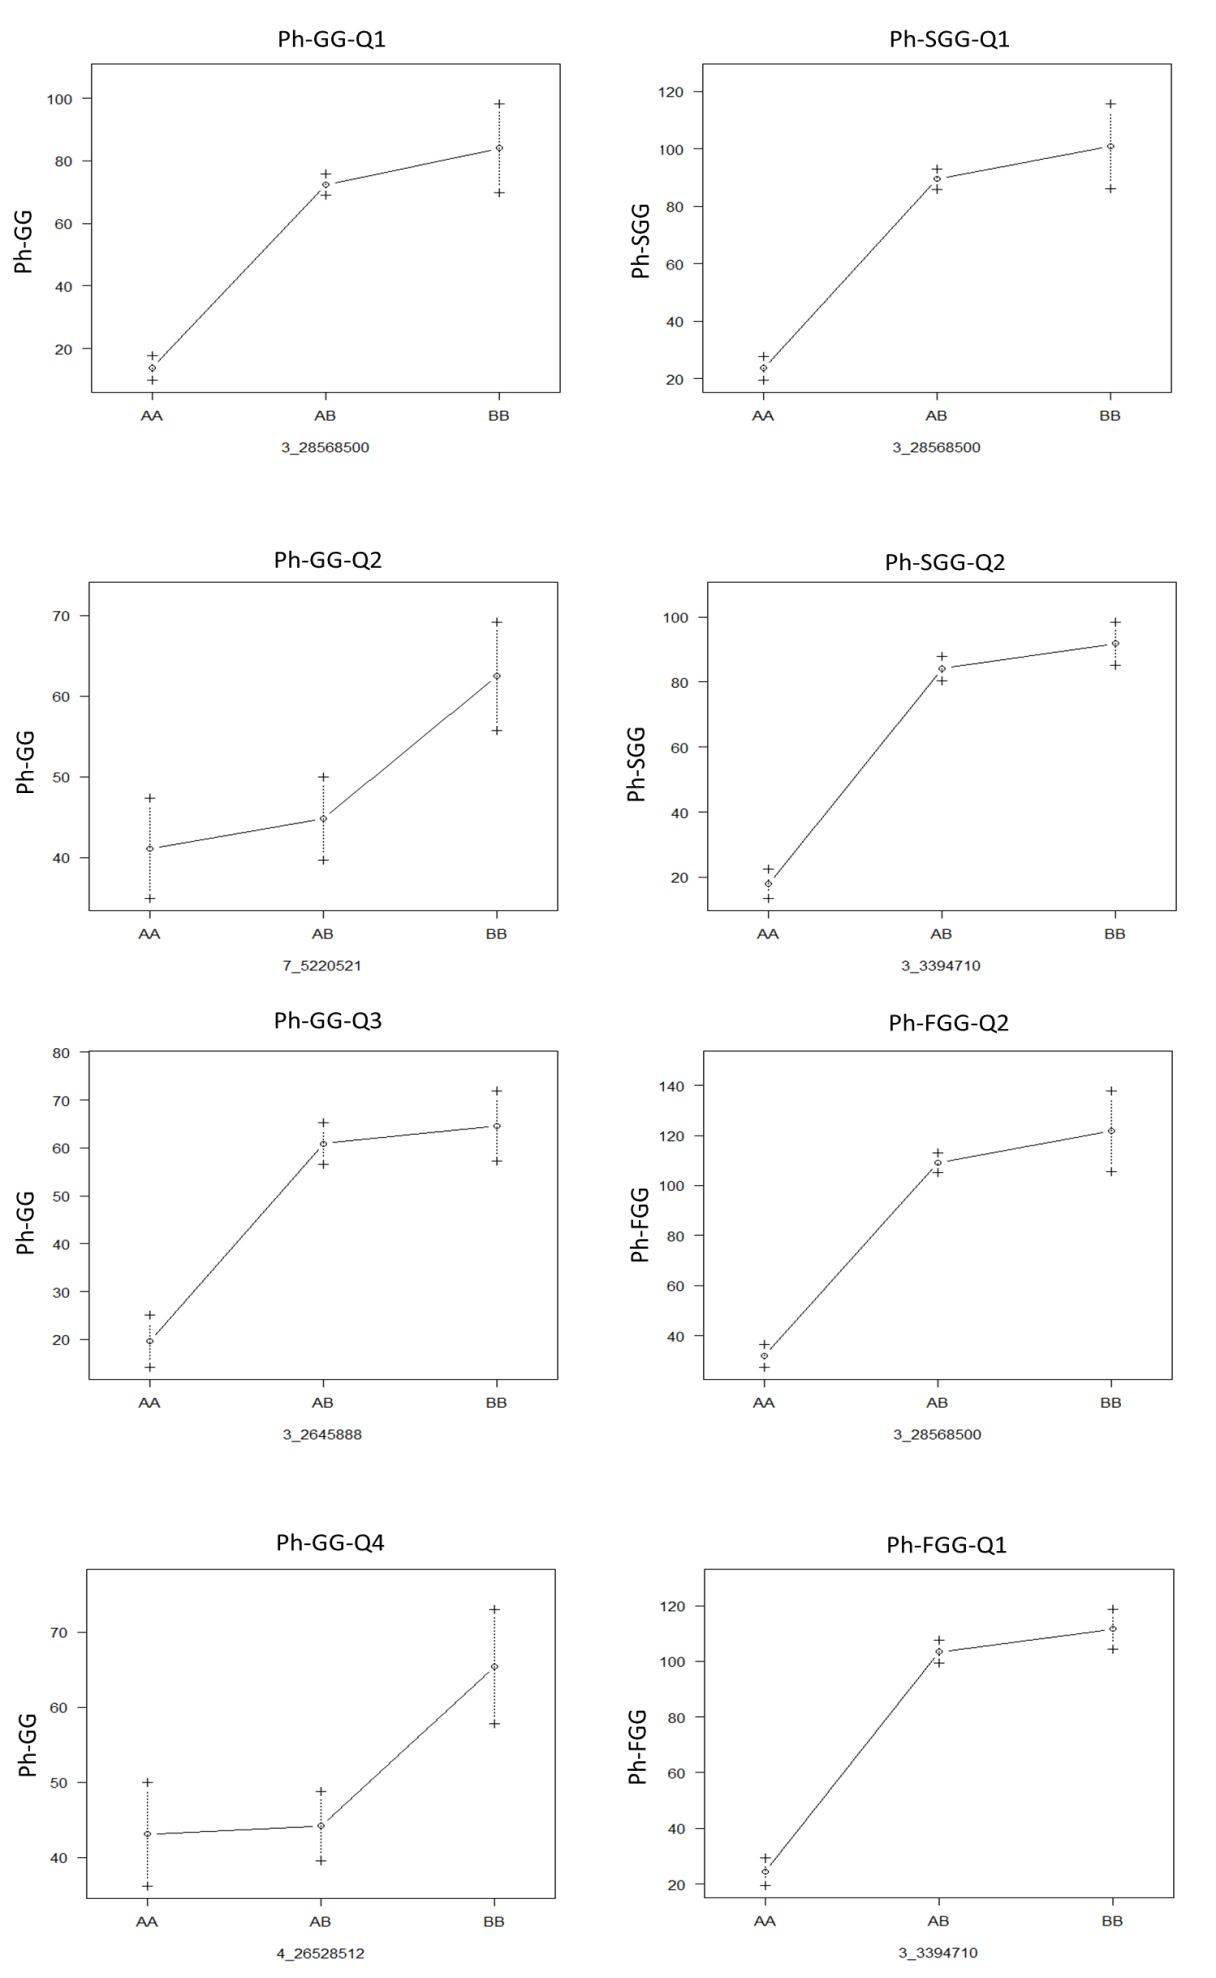


**Supplementry Figure S7-B.** -Continued


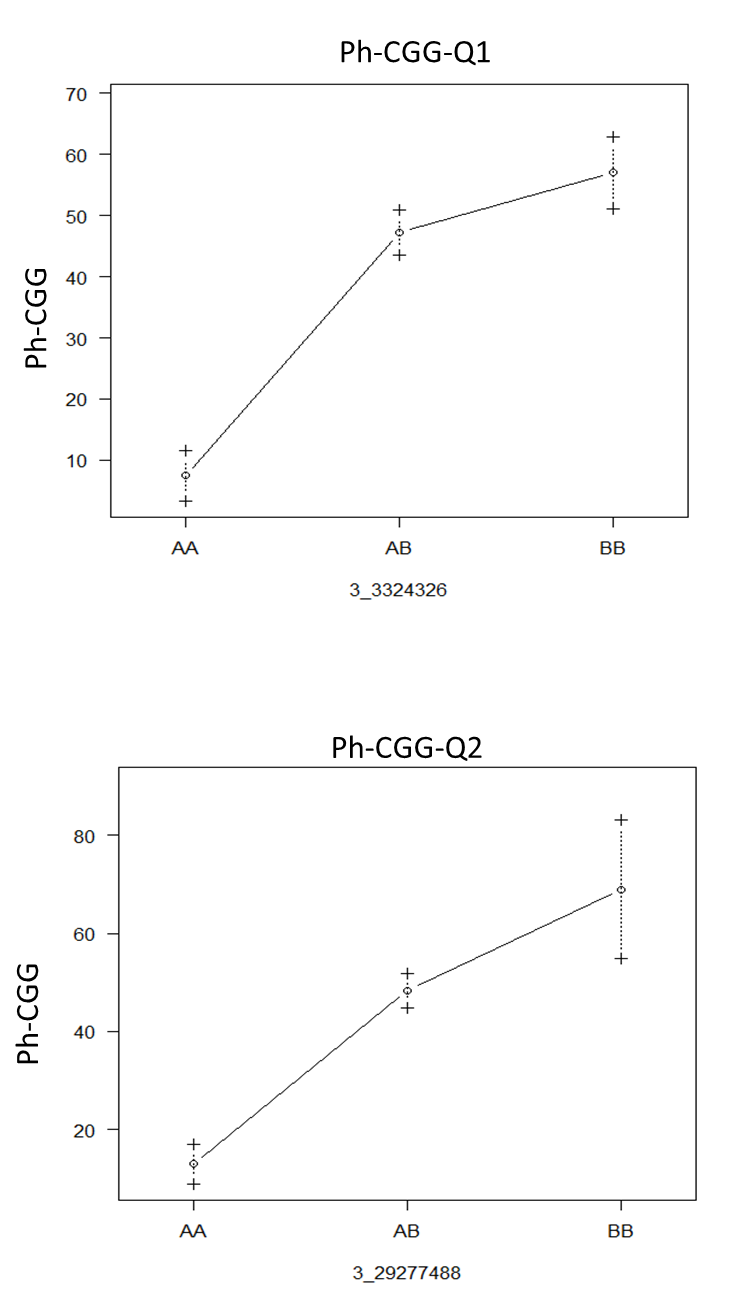


**Supplementry Figure S7-B.** -Continued


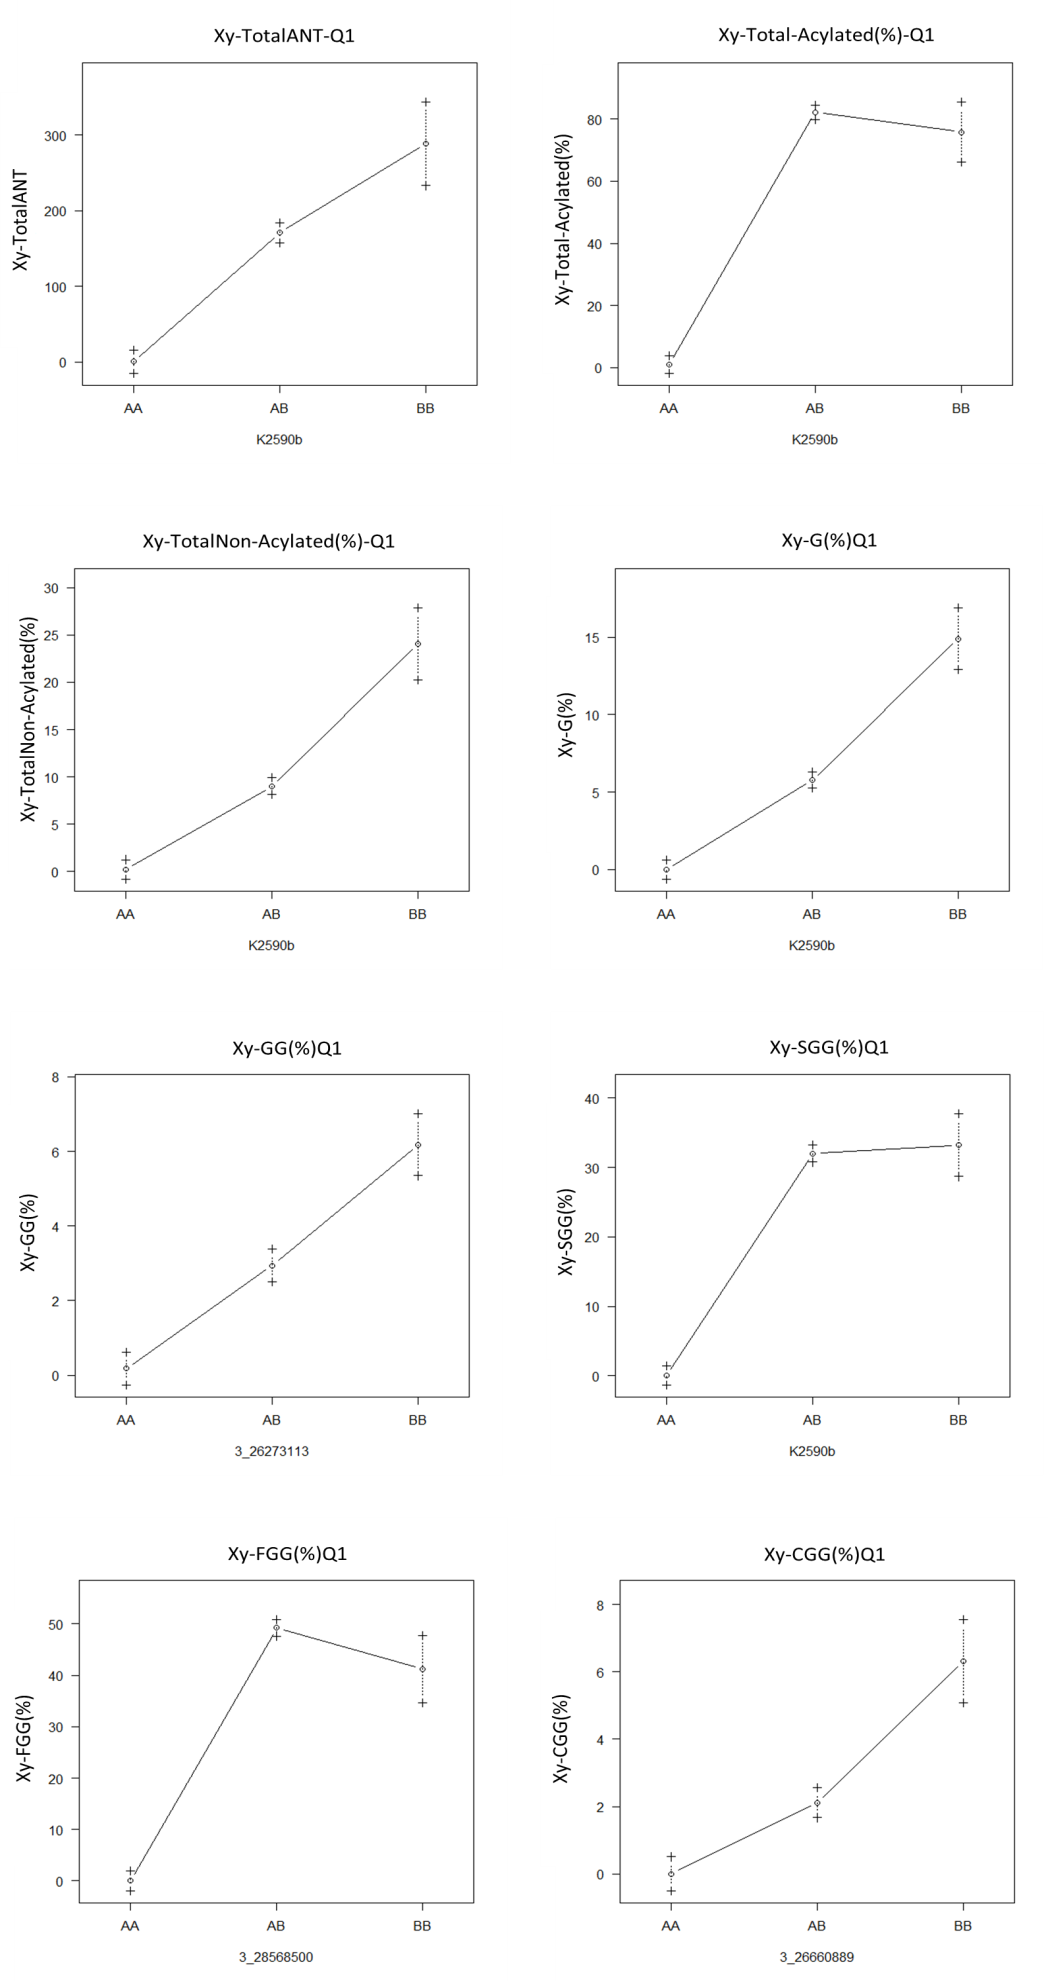


**Supplementry Figure S7-B.** -Continued


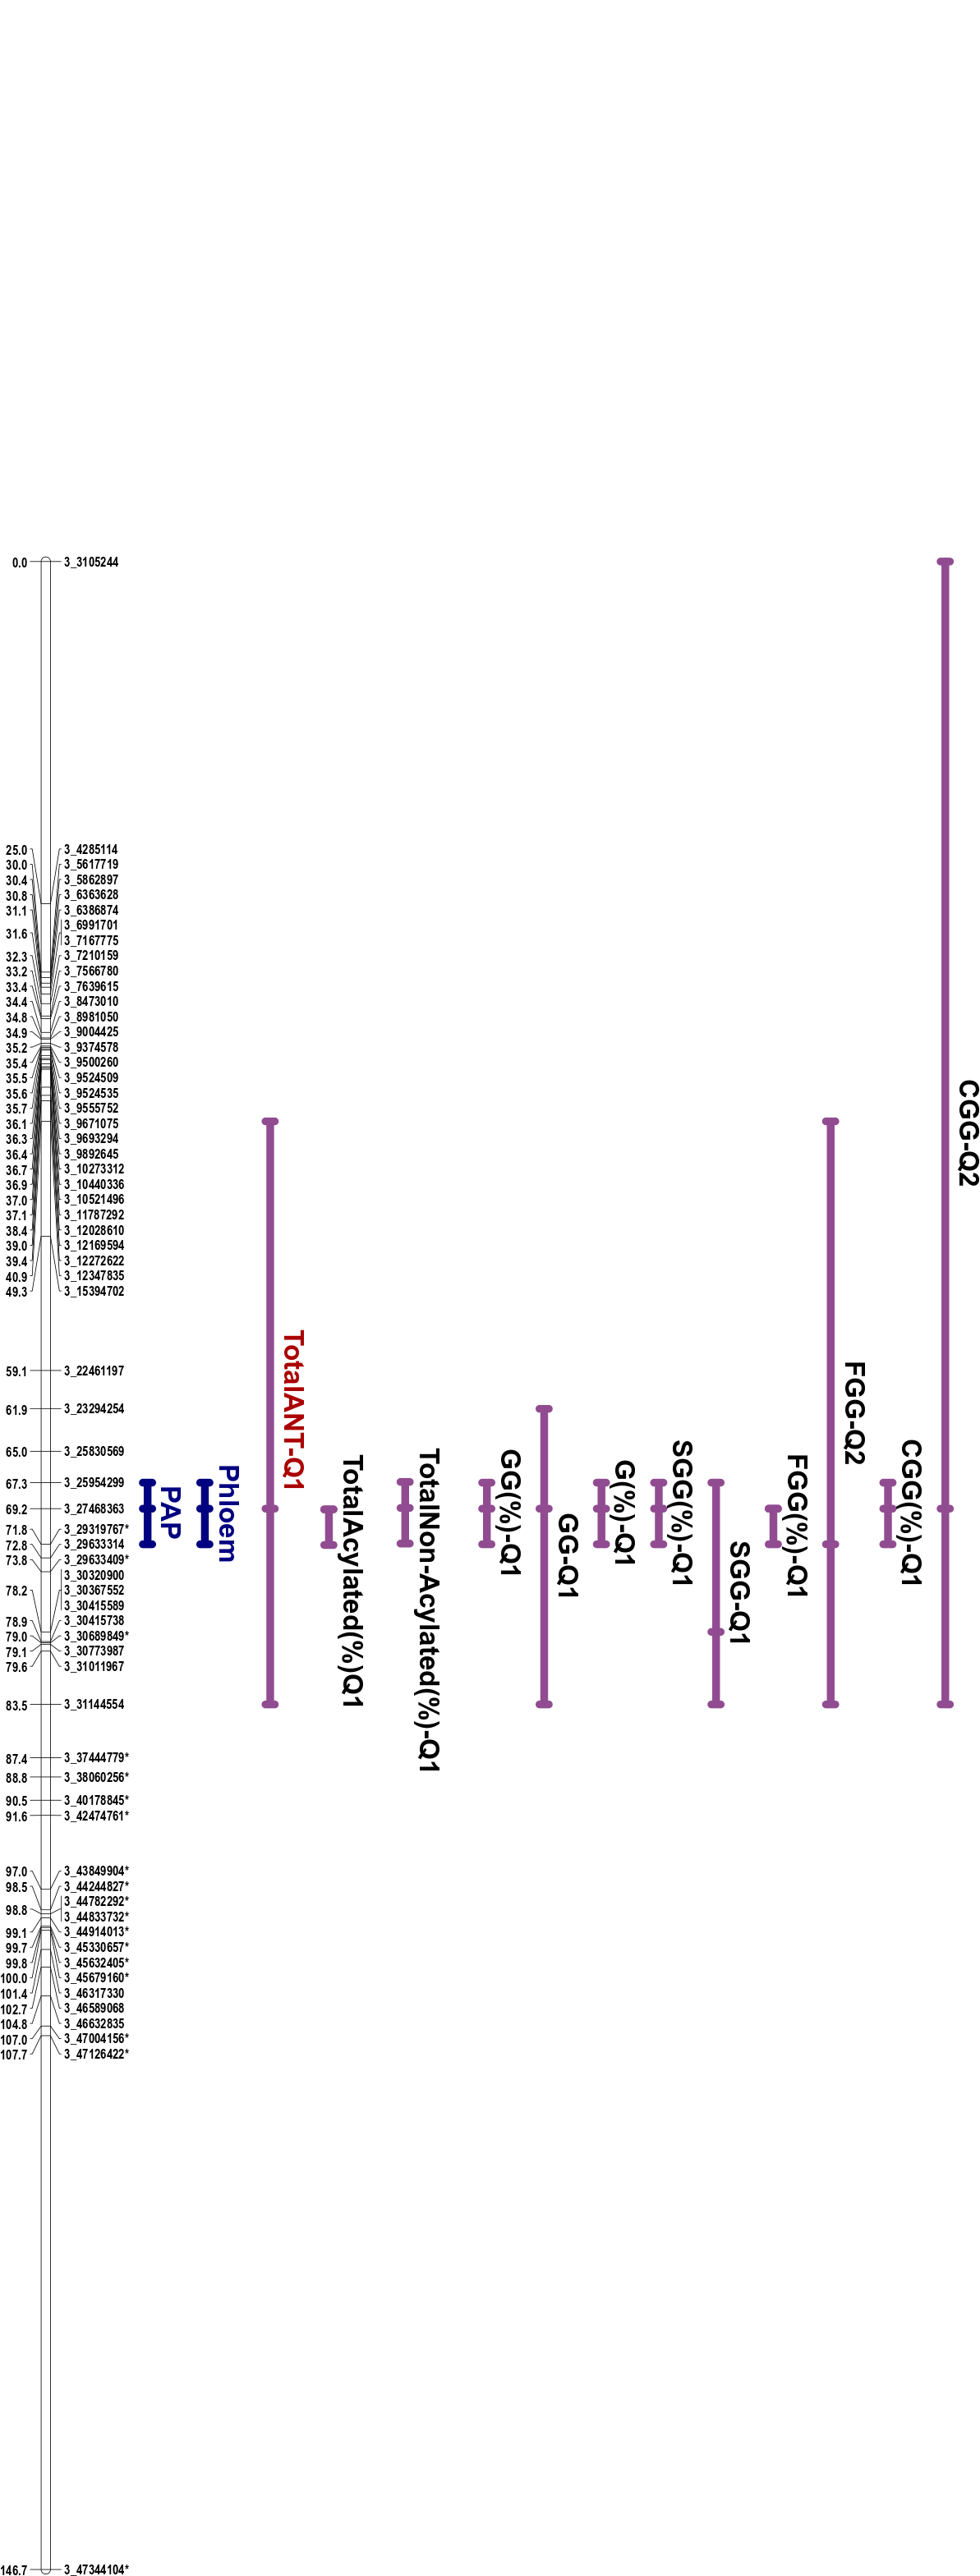


**CHR 3**


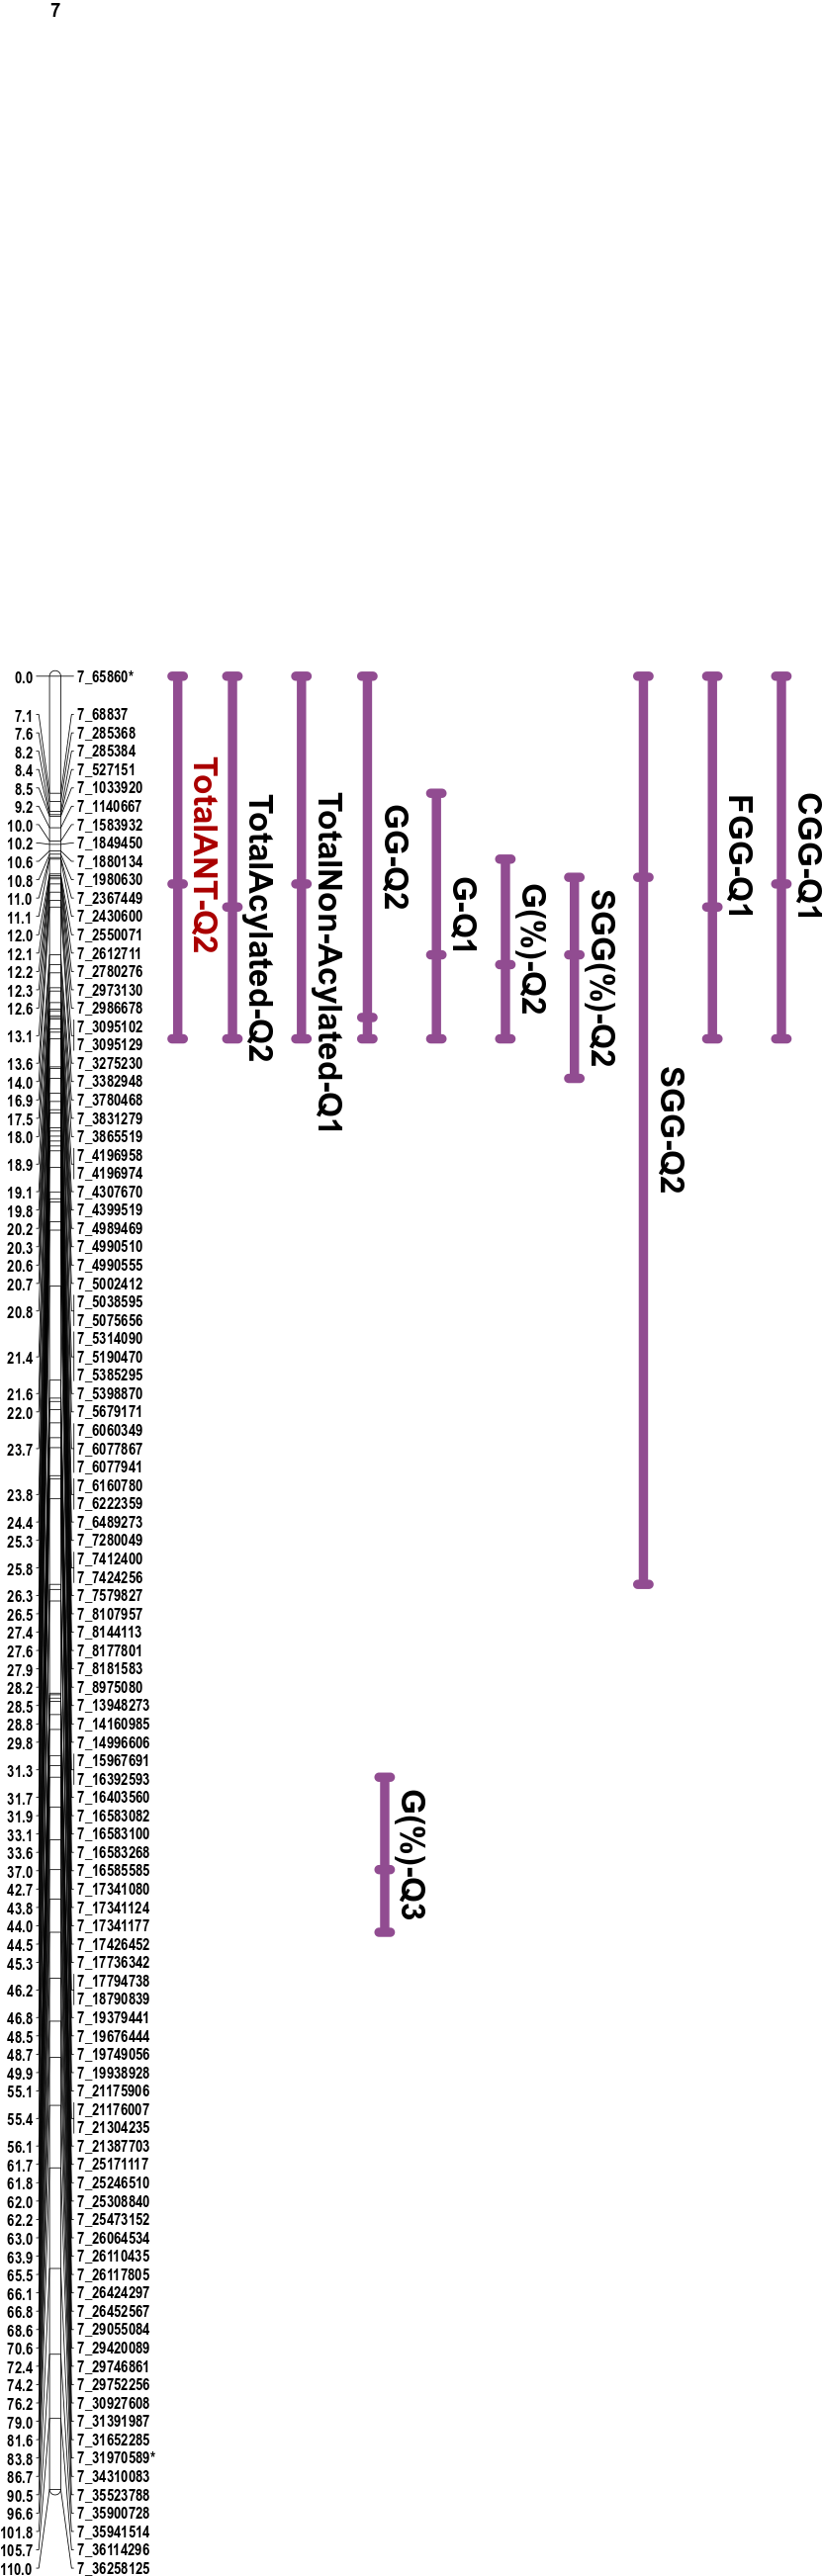


**CHR 7**

**Supplementary Figure S8.** Genetic mapping of QTL for concentration of individual and combined anthocyanin pigments in the roots of population 5171, obtained with the Haley Knott regression method. Pigment content was expressed as percentage (%) relative to the total anthocyanin content in the root, and as mg per gram fresh weight (mg/g fw). QTL for individual (in black font) and combined (in red font) are indicated on the right of the LG, with each bar indicating the 1.5 LOD interval and the position of the maximum LOD value for the QTL. QTL were named with the root tissue (Ph=phloem, Xy=xylem) followed by the abbreviated quantitative trait (as described in Table 2) and the QTL number for that trait (for a given trait, QTL were numbered in decreasing order based on their explanatory power).


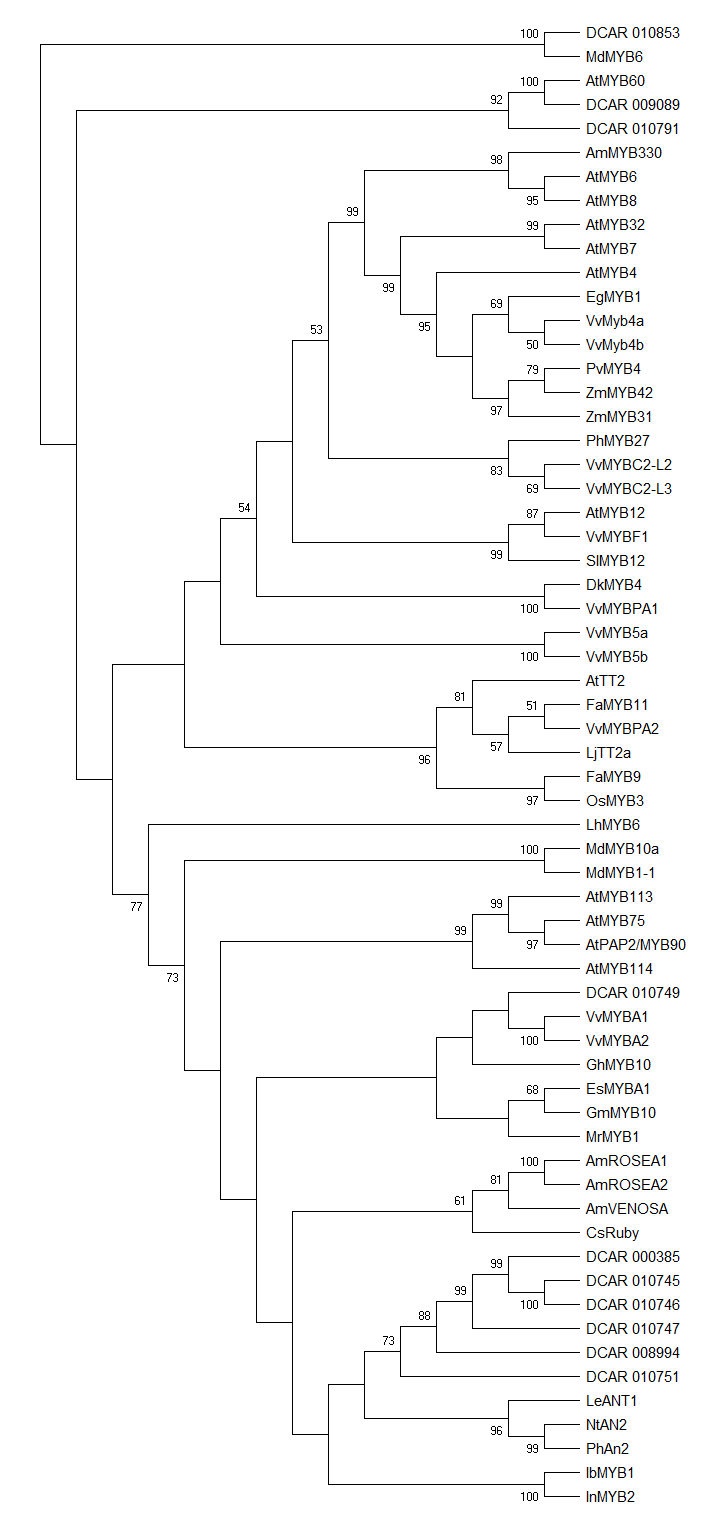


Anthocyanin activators

Proanthocyanidins

Proanthocyanidins

Flavonols

Anthocyanin and other flavonoid repressors

Flavonols

Flavonols

**Supplementary Figure S9 – A.** Phylogenetic relationships among ten carrot MYB TFs located within the *P*1 (blue circles) and *P*3 (red circles) regions, and MYBs from other species known to be involved in the regulation of different flavonoid compounds. The tree was constructed with MEGA X software using neighbor-joining phylogeny testing with 1,000 bootstrap replicates. Percentage values of replicate trees (>50) in which the associated taxa clustered together in the bootstrap test are indicated next to the branches. Accession numbers and gene IDs for the protein sequences used in the analysis are in Supplementary Table S14.

**R2**

**R3**


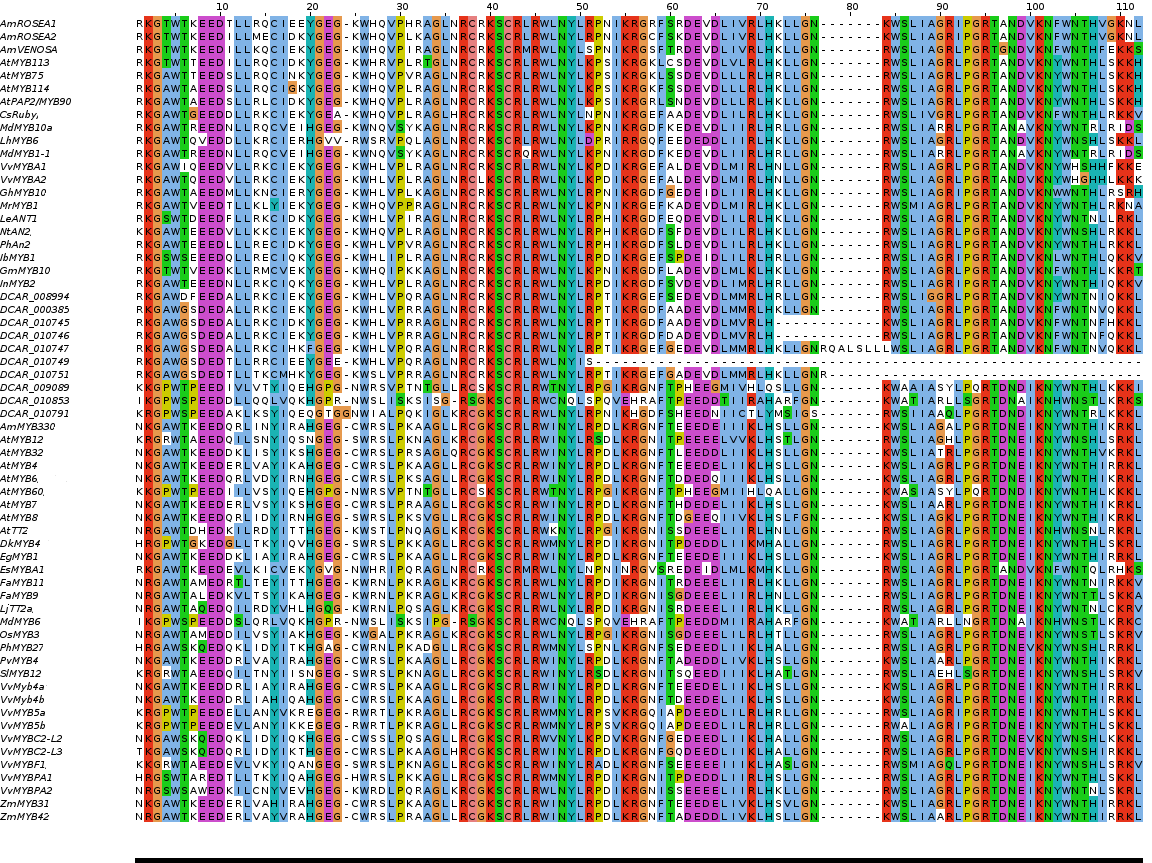


**Supplementary Figure S9 – B.** Protein sequence alignment of the conserved region of the MYB R2R3 domain of ten carrot MYBs and 52 MYB TFs of other species known to be involved in the regulation of different flavonoid compounds. Arrows indicate three specific amino-acid residues at positions 39 (R), 64 (V), and 97 (A), which are conserved across anthocyanin-activating MYBs. The large rectangle includes all the MYB genes that were phylogenetically clustered into the ‘anthocyanin activators’ clade (see Figure S9-A), and the vertical small rectangle indicates the conserved motif [A/S/G]N[D/A]V in the R2R3 domain characteristic for dicot anthocyanin-promoting MYBs (Lin-Wang et al. 2010).

Sub-group IIIb


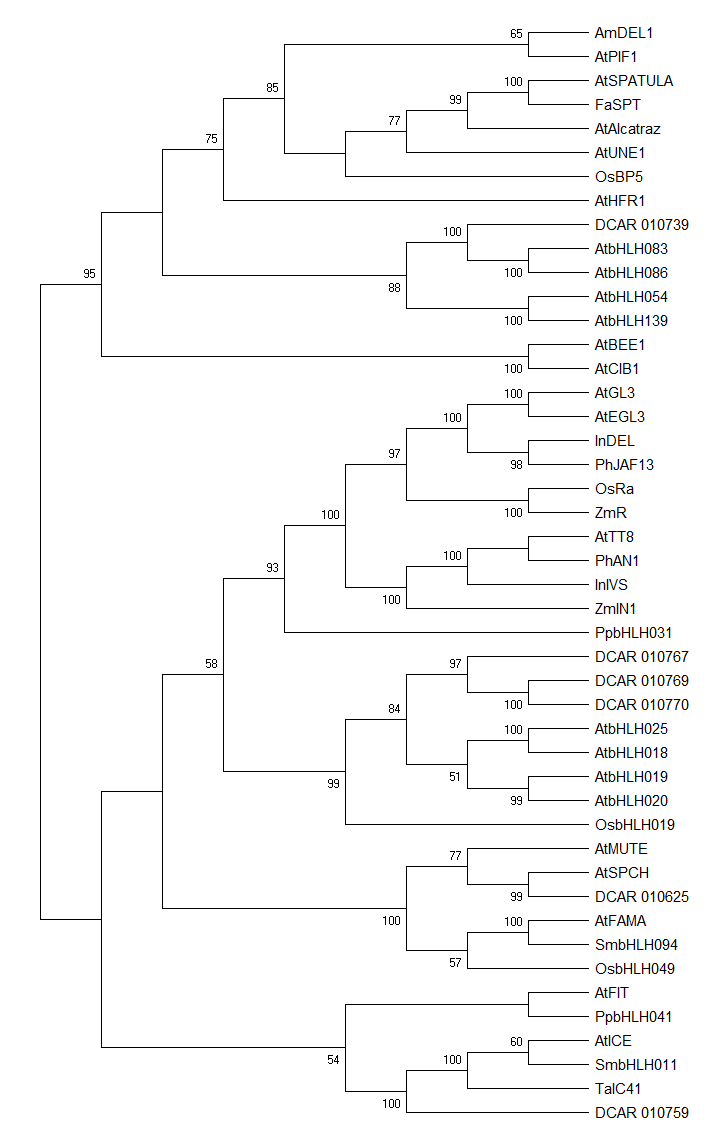


Sub-group VII

Sub-group VIII

Sub-group XII

Sub-group IIIf *

Sub-group IVa

Sub-group Ia

Sub-group III (a+c)

Sub-group IIIb

**Supplementary Figure S10.** Phylogenetic relationships among six carrot bHLH TFs located within the *P*3 (red circles) region, and bHLH genes from other species. The subgroups in the bHLH TF family were previously defined by Pires and Dolan (2010) and Feller et al. (2011). Previously characterized bHLH genes from other species known to be involved in the regulation of anthocyanin biosynthesis correspond to sub-group IIIf, indicated with an asterisk. The tree was constructed with MEGA X, using neighbor-joining phylogeny testing with 1,000 bootstrap replicates. Percentage values of replicate trees (>50) in which the associated taxa clustered together in the bootstrap test are indicated next to the branches. Accession numbers and gene IDs for the protein sequences used in the analysis are in Supplementary Table S14.


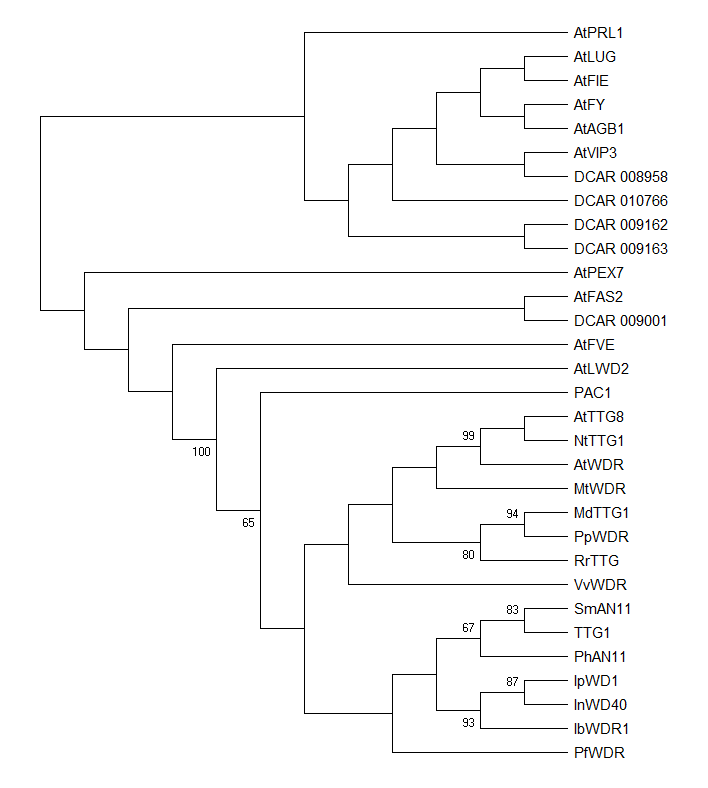


Anthocyanin related WD40 genes

**Supplementary Figure S11.** Phylogenetic relationships among WD40 TFs located within the *P*1 (blue circles) and *P*3 (red circles) regions of CHR 3 and WD40 genes from other species. Previously characterized WD40 genes from other species known to be involved in the regulation of anthocyanin biosynthesis are indicated with yellow stars. The tree was constructed using MEGA X, neighbor-joining phylogeny testing, with 1,000 bootstrap replicates. Percentage values of replicate trees (>50) in which the associated taxa clustered together in the bootstrap test are indicated next to the branches. Accession numbers and gene IDs for the protein sequences used in the analysis are in Supplementary Table S14.


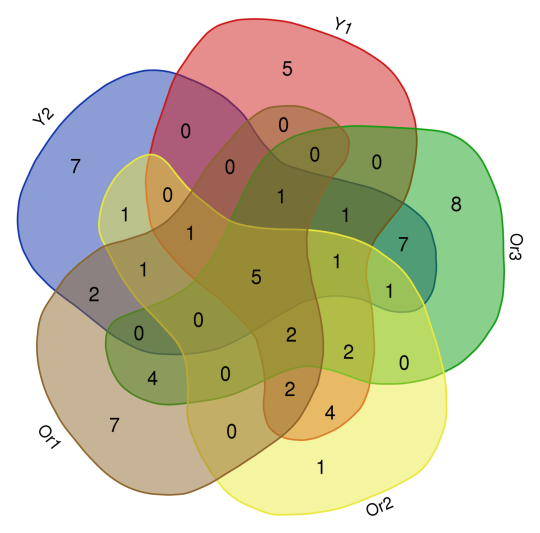

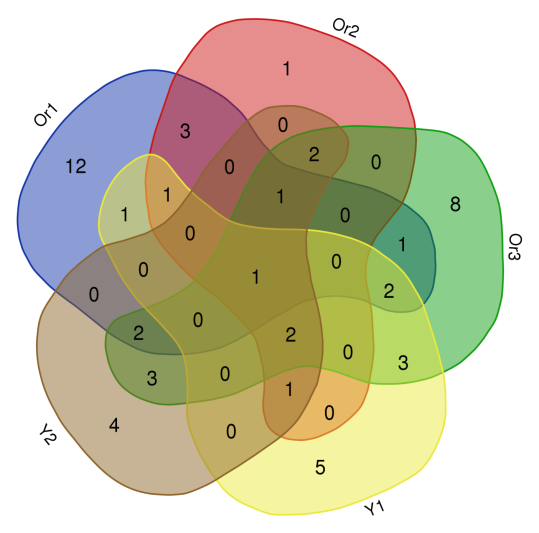


**DCAR_009048**

(Sodium transporter HKT1)

**DCAR_010711** (Polyuridylate-binding protein UBP1C)

**DCAR_010730** (LIM domain-containing protein WLIM1)

**DCAR_010745** (*DcMYB7*)

**DCAR_010757** (MADS-box TF)

**DCAR_010828** (probable N-acetyltransferase HLS1-like)

**A**

**B**

**Supplementary Figure S12.** Venn diagrams depicting the number of differentially expressed genes (DEGs) among all 15 pairwise comparisons between purple and non-purple roots in the *P*1 (panel A) and *P*3 (panel B) regions of CHR 3 harboring QTL for root and petiole tissue-specific anthocyanins. DEGs in red and green are upregulated and downregulated in purple roots, respectively.


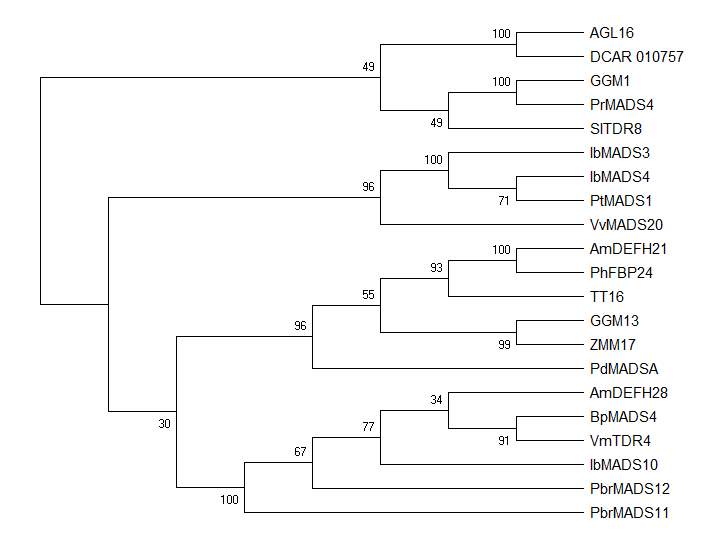


**Supplementary Figure S13.** Phylogenetic relationships among MADS-box transcription factors from diverse plant species, including the carrot MADS-box gene DCAR_010757 located in *P*3 region of CHR 3 (red dot). MADS-box genes known to be involved in the regulation of anthocyanin biosynthesis are indicated with yellow stars. The tree was constructed using MEGA X, neighbor-joining phylogeny testing, with 1,000 bootstrap replicates. Percentage values of replicate trees in which the associated taxa clustered together in the bootstrap test are indicated next to the branches. Accession numbers and gene IDs for the protein sequences used in the analysis are in Supplementary Table S14.


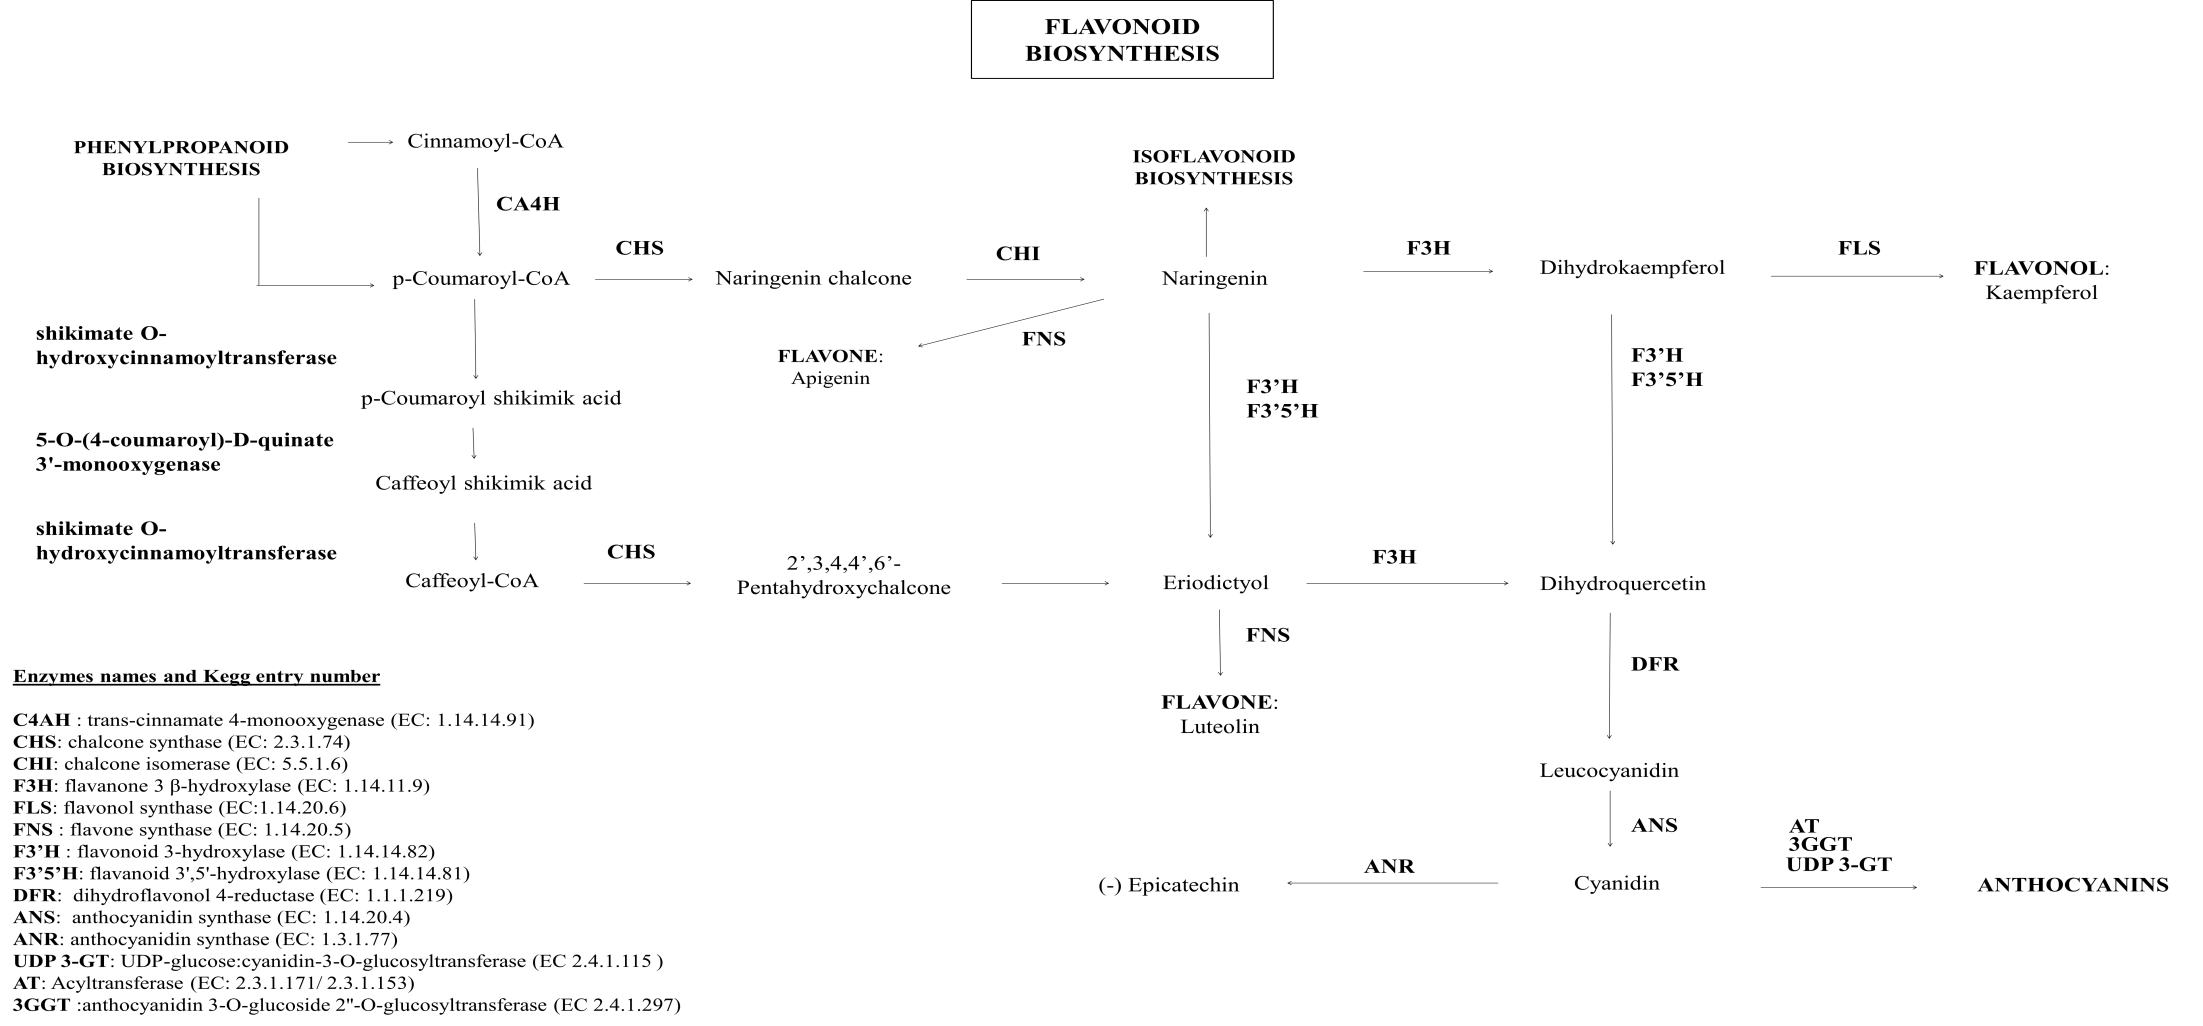


**Supplementary Figure S14.** Schematic representation of the flavonoid and anthocyanin pathways in plants (modified from the Kyoto Encyclopedia of Genes and Genomes-KEGG- database). Structural genes are in bold.


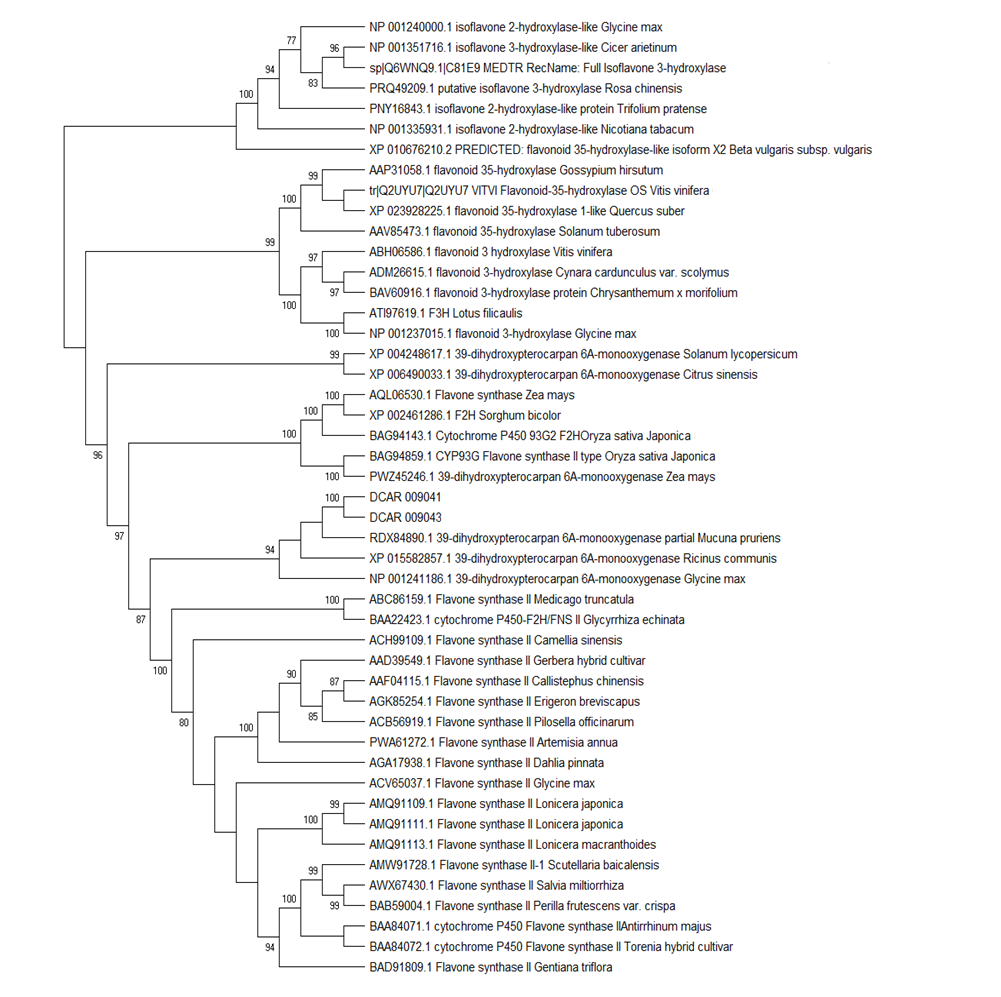


ISH

F3'H

F3'5'H

D6aH

FNS/F2H

D6aH

FNS/F2H

**Supplementary Figure S15**. Phylogenetic analysis of Cytochrome P450 enzymes involved in the flavonoid pathway. Aminoacid sequences of different P450s families and subfamilies (CYP75, CYP81E, CYP93A, CYP93B and CYP93G) were downloaded from GenBank and used to construct the phylogenetic tree using the Neighbor-joining method, Poisson model and 1000 bootstrap replicates as parameters in MEGA X. The percentages of replicate trees in which the associated taxa clustered together (>50) in the bootstrap test are shown next to the branches. The two carrot Cytochrome P450 (DCAR_009041 and DCAR_009043), which are located in the *P*1 region of CHR 3 and were differentially expressed in transcriptome comparisons among purple carrots with different anthocyanin content, are indicated with blue dots. Accession numbers and gene IDs for the protein sequences used in the analysis are in Supplementary Table S19. Abbreviations for the sub-types of Cytochrome P450 are as follows: D6aH: 3, 9-dihydroxypterocarpan 6A-monooxygenase; F3'H: Flavonoid 3' hydroxylase; F3'5'H: Flavonoid 3', 5' hydroxylase; IFH: Isoflavone hyroxylase; F2H: (2S)-flavanone 2-hydroxylase; FNS: Flavone synthase.
