# Supplementary material for: Dissecting the genetic control of root and leaf tissue-specific anthocyanin pigmentation in carrot (Daucus carota L.)
Source: Springer Nature journal article supplement (doi:10.1007/s00122-019-03366-5), 2019-05-29
Supplement: MOESM2 [file 122_2019_3366_MOESM2_ESM.xlsx]

## Sheet: List of tables
	List of tables included in this file
	Supplementary Table S1. Characteristics of the plant materials and sequencing libraries used for transcriptome (RNA-seq) analysis, and number of reads obtained for each sample
	Supplementary Table S2. Normalization factors for pair-wise transcriptome comparison
	Supplementary Table S3: Observed phenotypic frequencies of purple pigmentation in the root phloem (A) and xylem (B), and in leaf petioles (C), in F2, and F4 carrot families
	Supplementary Table S4. Concentration of individual and combined anthocyanin pigments in purple root phloem and xylem tissues of population 3242 (A) and concentration of individual and combined anthocyanin pigments in roots of population 5171 (B)
	Supplementary Table S5. Summary of QTL for individual and combined anthocyanin pigments in the root phloem of population 3242 obtained using the multiple imputation mapping method
	Supplementary Table S6. Summary of QTL for individual and combined anthocyanin pigments in the root phloem of population 3242 obtained using the Haley Knott regression method
	Supplementary Table S7. Marker allelic interactions for phloem anthocyanin QTL on chromosome 3 that revealed significant interactions
	Supplementary Table S8. Summary of QTL for individual and combined anthocyanin pigments in purple roots of population 5171, detected with the Haley Knott regression mapping method
	Supplementary Table S9. Phenotypic information for carrot root and petioles color, and marker genotypes for the F2 samples used in QTL mapping
	Supplementary Table S10. Phenotypic information for carrot root and petioles color, and marker genotypes for the F4 samples used in QTL mapping
	Supplementary Table S11. Carrot predicted peptides annotated as structural genes involved in the flavonoid and anthocyanin biosynthetic pathways
	Supplementary Table S12. List of annotated genes in the P1 and P3 regions of chromosome 3 harboring co-localized QTL for tissue-specific anthocyanin pigments. Subject descriptions are the top Blastp hits in Swiss-Prot
	Supplementary Table S13. List of MYB, bHLH and WD40 transcription factors identified within the P1 and P3 regions of chromosome 3
	Supplementary Table S14. MYB, bHLH and WD40 transcription factors (TF) used for phylogenetic analyses
	Supplementary Table 15. Differentially expressed genes (DEGs) detected in pairwise transcriptome (RNA-Seq) comparisons between purple and non-purple carrot roots, and among purple roots with different anthocyanin concentration
	Supplementary Table S16. Differentially expressed genes (DEGs) in the P1 and P3 regions of CHR 3 found in all 15 of the purple versus non-purple root transcriptome comparisons
	Supplementary Table 17. Expression analysis of candidate MYB genes (i.e., MYBs in the P1 and P3 regions of CHR 3 and phylogenetically-related to MYBs from other species known to be involved in anthocyanin biosynthesis) in pairwise transcriptome comparisons between purple and non-purple carrot roots, and among purple roots with different anthocyanin concentration
	Suplementary Table S18. Differentially expressed genes (DEGs) in the P1 and P3 regions of CHR 3 resulting from pair-wise transcriptome comparisons among dark purple (dP), medium purple (mP), and pale purple (pP) roots, containing high, intermediate, and low anthocyanin concentration, respectively.
	Supplementary Table S19. Genes used for phylogenetic analysis of CYP450 enzymes

## Sheet: S1
	Supplementary Table S1. Characteristics of the plant materials and sequencing libraries used for transcriptome (RNA-seq) analysis, and number of reads obtained for each sample.
	Sample set	Individual sample name	Population-generation, carrot line	Root color phenotype	Number of reads	Type of library §
	dP	dP-1	7280-F2	Purple root with high anthocyanin content in phloem	12418051	SE
		dP-2	7280-F2	Purple root with high anthocyanin content in phloem	13912152	SE
		dP-3	7280-F2	Purple root with high anthocyanin content in phloem	12974183	SE
	mP	mP-1	7280-F2	Purple root with intermediate anthocyanin content in phloem	13910886	SE
		mP-2	7280-F2	Purple root with intermediate anthocyanin content in phloem	14439921	SE
		mP-3	7280-F2	Purple root with intermediate anthocyanin content in phloem	14219713	SE
	pP	pP-1	7280-F2	Purple root with low anthocyanin content in phloem	12032816	SE
		pP-2	7280-F2	Purple root with low anthocyanin content in phloem	10918928	SE
		pP-3	7280-F2	Purple root with low anthocyanin content in phloem	14197727	SE
	Or1	Or1-1	G2089-F4	Non-purple (orange) root	36476776	PE
		Or1-2	G2089-F4	Non-purple (orange) root	20628118	PE
		Or1-3	G2089-F4	Non-purple (orange) root	10204366	PE
	Or2	Or2-1	Y8519-F3	Non-purple (orange) root	6852096	PE
		Or2-2	Y8519-F3	Non-purple (orange) root	29068480	PE
		Or2-3	Y8519-F3	Non-purple (orange) root	6852502	PE
	Or3	Or3-1	B493	Non-purple (orange) root	20660555	SE
		Or3-2	B493	Non-purple (orange) root	20648034	SE
		Or3-3	B493	Non-purple (orange) root	19949100	SE
	Y1	Y1-1	Y8519-F3	Non-purple (yellow) root	7548944	PE
		Y1-2	Y8519-F3	Non-purple (yellow) root	25398448	PE
		Y1-3	Y8519-F3	Non-purple (yellow) root	7082062	PE
	Y2	Y2-1	Y9244	Non-purple (yellow) root	19580134	SE
		Y2-2	Y9244	Non-purple (yellow) root	20686679	SE
		Y2-3	Y9244	Non-purple (yellow) root	20766516	SE
	§ Libraries were prepared for single end (SE) or paired end (PE) reads

## Sheet: S2
	Supplementary Table S2. Normalization factors for pair-wise transcriptome comparison
	Samples	Pair-wise comparisons †
		dP/mP	dP/pP	mP/pP	dP/Or1	dP/Or2	dP/Or3	dP/Y1	dP/Y2	mP/Or1	mP/Or2	mP/Or3	mP/Y1	mP/Y2	pP/Or1	pP/Or2	pP/Or3	pP/Y1	pP/Y2
	dP-1	0.97	0.941839	-	0.869927	0.90127	0.924538	0.946135	0.925531	-	-	-	-	-	-	-	-	-	-
	dP-2	1.01295	0.990066	-	0.91799	0.944203	0.959279	0.992829	0.977684	-	-	-	-	-	-	-	-	-	-
	dP-3	1.02359	0.993531	-	0.921795	0.950619	0.976539	0.997833	0.982379	-	-	-	-	-	-	-	-	-	-
	mP-1	0.977667	-	0.947929	-	-	-	-	-	0.865018	0.902852	0.949102	0.973594	0.930628	-	-	-	-	-
	mP-2	1.02215	-	1.08157	-	-	-	-	-	0.922119	0.960785	0.97816	1.01392	0.990411	-	-	-	-	-
	mP-3	0.999095	-	1.05445	-	-	-	-	-	0.897876	0.938087	0.94481	0.980266	0.965776	-	-	-	-	-
	pP-1	-	0.949529	0.941953	-	-	-	-	-	-	-	-	-	-	0.854044	0.883443	0.903588	1.04177	0.914578
	pP-2	-	1.08062	1.0018	-	-	-	-	-	-	-	-	-	-	0.981755	1.00868	1.02712	1.00119	1.0391
	pP-3	-	1.05195	0.980245	-	-	-	-	-	-	-	-	-	-	0.955581	0.986752	1.00345	1.02949	1.00449
	Or1-1	-	-	-	1.08655	-	-	-	-	1.10399	-	-	-	-	1.06413	-	-	-	-
	Or1-2	-	-	-	1.0935	-	-	-	-	1.08485	-	-	-	-	1.06196	-	-	-	-
	Or1-3	-	-	-	1.14334	-	-	-	-	1.16582	-	-	-	-	1.10445	-	-	-	-
	Or2-1	-	-	-	-	1.0828	-	-	-	-	1.08675	-	-	-	-	1.05426	-	-	-
	Or2-2	-	-	-	-	1.08498	-	-	-	-	1.06608	-	-	-	-	1.05237	-	-	-
	Or2-3	-	-	-	-	1.05221	-	-	-	-	1.06071	-	-	-	-	1.02503	-	-	-
	Or3-1	-	-	-	-	-	1.05839	-	-	-	-	1.0521	-	-	-	-	1.04177	-	-
	Or3-2	-	-	-	-	-	1.023	-	-	-	-	1.02006	-	-	-	-	1.00119	-	-
	Or3-3	-	-	-	-	-	1.0664	-	-	-	-	1.06231	-	-	-	-	1.02949	-	-
	Y1-1	-	-	-	-	-	-	1.07849	-	-	-	-	1.05989	-	-	-	-	1.05275	-
	Y1-2	-	-	-	-	-	-	0.968906	-	-	-	-	0.962602	-	-	-	-	0.947798	-
	Y1-3	-	-	-	-	-	-	1.02098		-	-	-	1.0129	-	-	-	-	0.991063	-
	Y2-1	-	-	-	-	-	-	-	1.03772	-	-	-	-	1.03603	-	-	-	-	1.00918
	Y2-2	-	-	-	-	-	-	-	1.05073	-	-	-	-	1.05659	-	-	-	-	1.02886
	Y2-3	-	-	-	-	-	-	-	1.03171	-	-	-	-	1.02625	-	-	-	-	1.00892
	† Sets dP (dark purple), mP (medium purple), and pP (pale purple) correspond to purple roots with high, intermediate and low anthocyanin content, respectively. Sets Or1, Or2 and Or3 correspond to orange-root carrots; and sets Y1 and Y2 are yellow carrots. § Normalization factors were calculated for each sample with the trimmed mean of M-values (TMM) in edgeR.

## Sheet: S3
Supplementary Table S3: Observed phenotypic frequencies of purple pigmentation in the root phloem (A) and xylem (B), and in leaf petioles (C), in F2, and F4 carrot families
A	Phloem
	Population	Total N	Purple	Non purple	Unclear phenotype	N evaluated	Expected segregration ratios §	χ2	P
	3242 A	253	189	48	16	237	1:0, 3:1, 9:7,15:1	2.848	0.091
	3242 B	254	190	49	15	239	1:0, 3:1, 9:7,15:1	2.579	0.108
	60806	31	23	8	0	31	1:0, 3:1, 9:7,15:1	0.0108	0.917
	60807	37	23	7	7	30	1:0, 3:1, 9:7,15:1	0.0444	0.833
	60808	33	25	8	0	33	1:0, 3:1, 9:7,15:1	0.0101	0.9199
	60803	9	8	1	0	9	1:0, 3:1, 9:7,15:1	0.9259	0.336
	5171	110	74	36	0	110	1:0, 3:1, 9:7,15:1	3.503	0.061
	7177	34	27	7	0	34	1:0, 3:1, 9:7,15:1	0.35	0.55
	7184	55	55	0	0	55	1:0, 3:1, 9:7,15:1	0	1
	7181	46	45	1	0	46	1:0, 3:1, 9:7,15:1	0	1
	7183	39	39	0	0	39	1:0, 3:1, 9:7,15:1	0	1
	7176	12	8	4	0	12	1:0, 3:1, 9:7,15:1	0.44	0.5
	7180	70	55	14	1	69	1:0, 3:1, 9:7,15:1	0.82	0.37
	7187	28	24	4	0	28	1:0, 3:1, 9:7,15:1	4.33	0.66
B	Xylem
	Population	Total N	Purple	Non purple	Unclear phenotype	N evaluated	Expected segregration ratios §	χ2	P
	3242 A	253	140	92	21	232	3:1, 9:7,15:1	1.58	0.21
	3242 B	254	149	103	2	252	3:1, 9:7,15:1	0.85	0.36
	60806	31	18	13	0	31	3:1, 9:7,15:1	0.04	0.83
	60807	37	18	13	6	31	3:1, 9:7,15:1	0.04	0.83
	60808	33	17	16	0	33	3:1, 9:7,15:1	0.31	0.58
	60803	9	8	1	0	9	3:1, 9:7,15:1	3.9	0.05
	5171	110	nd	nd	nd	nd	nd	nd	nd
	7177	34	26	8	0	34	3:1, 9:7,15:1	0.39	0.84
	7184	55	39	16	0	55	3:1, 9:7,15:1	0.49	0.48
	7181	46	nd	nd	nd	nd	nd	nd	nd
	7183	39	nd	nd	nd	nd	nd	nd	nd
	7176	12	8	4	0	12	3:1, 9:7,15:1	0.44	0.51
	7180	70	49	21	0	70	3:1, 9:7,15:1	0.93	0.33
	7187	28	0	28	0	28	0:1	0	1
C	Petioles
	Population	Total N	Purple	Non purple	Unclear phenotype	N evaluated	Expected segregration ratios §	χ2	P
	3242 A	253	142	96	15	238	3:1, 9:7,15:1	1.13	0.29
	3242 B	254	149	98	7	247	3:1, 9:7,15:1	1.67	0.2
	60806	31	18	13	0	31	3:1, 9:7,15:1	0.98	0.32
	60807	37	21	16	0	37	3:1, 9:7,15:1	0	0.95
	60808	33	16	15	2	31	3:1, 9:7,15:1	2.45	0.12
	60803	9	7	2	0	9	3:1, 9:7,15:1	1.69	0.19
	5171	110	73	37	0	110	3:1, 9:7,15:1	4.38	0.04
	7177	34	24	10	0	34	3:1, 9:7,15:1	0.35	0.55
	7184	55	31	24	0	55	3:1, 9:7,15:1	0.35	0.55
	7181	46	32	9	5	41	3:1, 9:7,15:1	0.2	0.65
	7183	39	nd	nd	nd	nd	nd	nd	nd
	7176	12	5	3	4	8	3:1, 9:7,15:1	0.67	0.41
	7180	70	nd	nd	nd	nd	nd	nd	nd
	7187	28	0	28	0	28	0:1	0	1
	§Multiple segregation ratios were considered, based on previous studies. The χ2 tested is indicated in bold. *P < 0.05 for the significant segregating ratio.
	nd: no data available

## Sheet: S4
	Supplementary Table S4. Concentration of individual and combined anthocyanin pigments in purple root phloem and xylem tissues of population 3242 (A) and concentration of individual and combined anthocyanin pigments in roots of population 5171 (B)
	A
	F2 3242 - PHLOEM
		Cy3XGG			Cy3XG			Cy3XSGG			Cy3XFGG			Cy3XCGG			Total AA			Total NAA			Total anthocyanins
		mg/g fw	%		mg/g fw	%		mg/g fw	%		mg/g fw	%		mg/g fw	%		mg/g fw	%		mg/g fw	%		mg/g fw	%
	Mean ± SD	0.6 ± 0.4	15.0 ± 5.2		0.8 ± 0.4	20.7 ± 4.7		0.8 ± 0.3	23.2 ± 5.3		1.0 ± 0.3	30.8 ± 9.5		0.4 ± 0.4	10.2 ± 6.2		2.3 ± 1.0	64.3 ± 8.8		1.4 ± 0.8	35.7 ± 8.8		3.7 ± 1.7	100
	Range	0.0-1.5	0.0-25.2		0.01-1.6	5.7-40.7		0.0-1.4	0.0-59.8		0.0-1.6	0.0-68.5		0.0-1.4	0.0-27.5		0.03-4.1	47.2-94.3		0.01-3.2	5.7-52.7		0.05-7.1
	F2 3242 - XYLEM
		Cy3XGG			Cy3XG			Cy3XSGG			Cy3XFGG			Cy3XCGG			Total AA			Total NAA			Total anthocyanins
		mg/g fw	%		mg/g fw	%		mg/g fw	%		mg/g fw	%		mg/g fw	%		mg/g fw	%		mg/g fw	%		mg/g fw	%
	Mean ± SD	0.1 ± 0.2	3.7 ± 4.5		0.2 ± 0.3	7.1 ± 6.2		0.7 ± 0.5	34.2 ± 11.3		0.9 ± 0.5	51.8 ± 14.0		0.1 ± 0.2	3.1 ± 5.2		1.6 ± 1.2	89.2 ± 10.1		0.3 ± 0.4	10.8 ± 10.1		1.9 ± 1.5	100
	Range	0.0-1.2	0.0-27.1		0.0-1.4	0.0-34.8		0.0-1.6	0.0-87.6		0.0-1.7	0.0-100		0.0-1.2	0.0-25.1		3.0-4.4	38.1-100		0.0-2.6	0.0-61.8		0.03-6.5
	Anthocyanin concentration was expressed as mg of cyanidin equivalents per g of fresh weight (mg/g fw) and as percentage (%) relative to the total anthocyanin content (i.e., the sum of all five individual pigments). Pigment abbreviations are described in Table 2. Total acylated anthocyanin (AA) content was estimated by summing up the content of Cy3XSGG, Cy3XFGG, and Cy3XCGG; whereas the total cont…
	B
	F4 5171 - WHOLE ROOT
		Cy3XGG			Cy3XG			Cy3XSGG			Cy3XFGG			Cy3XCGG			Total acylated			Total non-acylated			Total anthocyanins
		mg/g fw	%		mg/g fw	%		mg/g fw	%		mg/g fw	%		mg/g fw	%		mg/g fw	%		mg/g fw	%		mg/g fw	%
	Mean ± SD	0.013 ± 0.013	5.3 ± 2.3		0.104 ± 0.104	26.5 ± 14.0		0.013 ± 0.007	4.1 ± 2.0		0.156 ± 0.104	61.1 ± 14.3		0.013 ± 0.026	3.1 ± 2.9		0.18±1.2	82.1 ± 12.9		0.12 ± 0.11	17.9 ± 12.9		0.3±0.24	100
	Range	0.0 - 0.065	1.4 - 11.1		0.0 - 0.403	0.6 - 44.5		0.0 - 0.46	4.8 - 44.5		0.003 - 41	32.8 - 81.9		0.0 - 0.104	0.8 - 7.2		0.004-.47	44.9-96.8		0.0001-0.41	3.2-55.1		0.004-0.86
	Anthocyanin concentration was expressed as mg of cyanidin equivalents per g of fresh weight (mg/g fw) and as percentage (%) relative to the total anthocyanin content (i.e., the sum of all five individual pigments). Pigment abbreviations are described in Table 2. Total acylated anthocyanin (AA) content was estimated by summing up the content of Cy3XSGG, Cy3XFGG, and Cy3XCGG; whereas the total cont…

## Sheet: S5
	Supplementary Table S5. Summary of QTL for individual and combined anthocyanin pigments in the root phloem of population 3242 obtained using the multiple imputation mapping method
	Trait	QTL	Chr.	Nearest marker	Position (cM) †	Max. LOD	1.5 LOD interval (nt)		Difference LOD interval (nt)	1.5 LOD interval (cM)		Difference LOD interval (cM)	% Var. Explained
	Ph-TotalANT	1	3	3_28568500	65.3381	26.4968	27356688	29895002	2538314	63.1541	67.5171	4.36301	25.446
		2	3	3_3324326	20	20.1194	2896034	3394589	498555	17.203	20.924	3.721	17.304
		3	4	4_28623267	69.9981	6.7855	25231548	30359233	5127685	63.3021	72.5901	9.28804	4.682
		4	7	7_2581400	13.523	7.48974	1205716	8144129	6938413	8.00801	28.89	20.882	5.227
		5	5	5_3003169	3.33	3.68358	1867584	39061371	37193787	0	69.2681	69.2681	2.42
	Ph-TotalAcylated(%)	1	3	4002091	22.91	116.13	4002091	4075544	73453	22.91	23.54	0.63	48.363
		2	3	3_26273113	58.77	102.82	26273113	26660889	387776	58.77	61.901	3.131	31.59
		3	7	7_810363	1.064	16.68	609767	704762	94995	0	2.2	2.2	0.9
		4	2	2_26291912	65.19	7.89	20282000	27218110	6936110	61.72	67.29	5.57	0.38
		5	4	4_6010436	12.7	5.44	823932	8784350	7960418	0	15.76	15.76	0.25
		(1x2)				93.19							23.1
	Ph-TotalNon-Acylated(%)		3	3_26273113	58.77	87.39	26273113	26660889	387776	58.77	61.91	3.14	48.92
		2	3	3_3716735	22.54	80.23	3394611	4075544	680933	21.62	23.54	1.92	38.51
		3	7	7_5220521	22.07	4.53	609767	31373463	30763696	0	70.3	70.3	0.53
		4	4	4_26528512	6.39	16.95	25231548	27109100	1877552	63.3	65.77	2.47	2.42
		(1x2)				69.6							26.74
	Ph-GG(%)	1	3	3_26273113	60	61.9756	26273113	26660889	387776	58.7701	61.9061	3.136	41.732
		2	3	3_3716735	22.544	54.8346	3394611	4075544	680933	21.627	23.541	1.91401	32.04
		3	4	4_26528512	64.3861	13.7561	25231548	27200449	1968901	63.3021	66.1341	2.83201	3.819
		4	9	9_19154976	51	8.76374	12950089	25223310	12273221	38.583	61.8311	23.248	2.242
		5	7	7_5220521	22.068	8.42713	609767	8144129	7534362	0	28.89	28.89	2.144
		6	2	2_27218110	67.294	4.72135	11230332	43702920	32472588	46.671	110.019	63.3481	1.132
		(1x2)				69.6							20.82
	Ph-G(%)	1	3	3_26273113	60	97.69	26273113	26660889	387776	58.77	61.906	3.136	50.1154
		2	3	3_3716735	22.544	92.195	3394611	4002091	607480	21.627	22.91	1.283	41.8835
		3	9	9_14985910	44.748	12.86	15097816	20040845	4943029	43.037	52.938	9.901	1.2566
		4	4	4_26528512	64.386	8.837	25231548	27200449	1968901	63.302	66.134	2.832	0.8081
		(1x2)				82.84							30.73
	Ph-SGG(%)	1	3	3_4002091	23	84.4855	26273113	26660889	387776	22.91	23.541	0.631	45.8834
		2	3	3_26660889	61	74.3626	26273113	26660889	387776	58.77	61.906	3.136	32.5794
		3	6	6_36100743	111.592	7.9964	34032205	36100743	2068538	106.29	111.592	5.3021	1.0197
		4	7	7_5314090	24	7.91525	609767	8802607	8192840	0	34.896	34.896	1.008
		5	2	2_663042	3.553	4.4046	342937	1173682	830745	0	7.64	7.64	0.5304
		(1x2)				62.05							21.11
	Ph-FGG(%)	1	3	3_4002091	23	53.2333	4002091	4075544	73453	22.91	23.541	0.631	46.084
		2	3	3_26273113	60	46.6746	26273113	26660889	387776	58.7701	61.9061	3.136	35.607
		3	7	7_5220521	22	6.37275	609767	13638301	13028534	0	43.959	43.959	2.399
		4	4	4_9048220	28	6.3583	6010436	11284556	5274120	12.704	33.311	20.607	2.393
		(1x2)				41.22						0	28.4
	Ph-CGG(%)	1	3	3_3394710	22	5.88737	3324326	4844562	1520236	20.336	23.952	3.61601	9.612
		2	3	3_10027571	31.7321	3.86063	7925825	34211276	26285451	27.452	75.0611	47.609	6.104
	Ph-TotalAcylated	1	3	3_3394710	21.74	17.24	2896034	4844562	1948528	17.2	23.95	6.75	20.96
		2	3	3_28568500	65.34	15.78	26660889	29895002	3234113			0	18.72
	Ph-TotalNon-Acylated	1	3	3_28568500	65.34	28.21	27356688	29277488	1920800	63.15	66.37	3.22	33.61
		2	3	3_3324326	20.34	11.41	2896034	4844562	1948528	17.2	23.65	6.45	10.211
		3	4	4_26528512	64.39	9.35	25231548	28735479	3503931	63.3	70.11	6.81	8.09
		4	7	7_2581400	13.52	9.1	1965285	8144129	6178844	10.87	28.89	18.02	7.85
	Ph-GG	1	3	3_28568500	65.3381	26.7127	27356688	29895002	2538314	63.1541	67.5171	4.36301	33.77
		2	7	7_5220521	21	10.8529	1965285	8144129	6178844	10.871	28.89	18.019	10.49
		3	4	4_26528512	64.386	10.6682	25231548	29514675	4283127	63.3	70.6371	7.3371	10.28
		4	3	3_3324326	19	10.3595	2501427	4002091	1500664	14.908	22.91	8.002	9.93
	Ph-G	1	3	3_28568500	65.3381	29.6789	27356688	29277488	1920800	63.1541	66.3681	3.21401	34.343
		2	3	3_3324326	20	13.1575	2896034	4002091	1106057	17.203	22.91	5.70701	11.47
		3	4	4_26528512	64.3861	8.77693	25231548	27200449	1968901	63.3021	66.1341	2.83201	7.123
		4	7	7_2581400	13.523	8.26554	1965285	8144129	6178844	10.871	28.89	18.019	6.653
	Ph-SGG	1	3	3_28568500	65	19.1749	27356688	29895002	2538314	63.1541	67.5171	4.36301	58.23
		2	3	3_3324326	20	16.7693	2896034	4075544	1179510	17.203	23.541	6.33801	48.9
	Ph-FGG	1	3	3_26273113	60	32.4442	26273113	26660889	387776	58.7701	61.9061	3.136	27.67
		2	3	K0149	34.9091	30.7831	3394611	12989354	9594743	21.627	36.9731	15.346	25.49
		(1x2)				17.88							11.83
	Ph-CGG	1	3	3_3324326	20.336	8.8462	2501427	11598279	9096852	14.908	34.395	19.487	22.64
		2	3	3_29277488	66.3681	5.61914	26273113	30638001	4364888	58.7701	70.2651	11.495	13.66
	† Refers to the map position of the maximum LOD value for each QTL
	1.5 LOD Intervals are expressed in physical (nt) and genetic distances (cM).
	Pigment content was expressed as either percentage (%) relative to the total anthocyanin content or as mg of cyanidin equivalents per gram of fresh weight (mg/g fw).
	QTL were named with the root tissue (ph=phloem) followed by the abbreviated quantitative trait, as described in first column of Table 2.

## Sheet: S6
	Supplementary Table S6. Summary of QTL for individual and combined anthocyanin pigments in the root phloem of population 3242 obtained using the Haley Knott regression method
	Trait	QTL	Chr.	Nearest marker	Position (cM) †	Max. LOD	1.5 LOD interval (nt)		Difference 1.5 LOD interval (nt)	1.5 LOD interval (cM)		Difference 1.5 LOD interval (cM)	% Var. Explained
	Ph-TotalANT	1	3	3_28568500	65.3381	25.0168	27356688	29895002	2538314	63.1541	67.5171	4.36301	24.952
		2	3	3_3324326	20	18.1879	2896034	5386392	2490358	17.203	25.12	7.91701	16.135
		3	7	7_2581400	13.523	6.5183	609767	8144129	7534362	0	28.89	28.89	4.773
		4	4	4_28623267	69.9981	5.78081	24410562	32528501	8117939	62.9691	82.0891	19.12	4.184
	Ph-TotalAcylated(%)	1	3	3_3394710	21.74	59.6	3394611	4075544	680933	21.63	23.54	1.91	53.4
		2	3	3_28568500	65.34	39.3	26273113	29277488	3004375	58.77	66.37	7.6	23.85
		(1x2)				31.48							16.5
	Ph-TotalNon-Acylated(%)	1	3	3_28568500	65.34	45.09	27356688	29277488	1920800	63.15	66.34	3.19	8.154
		2	3	3_4002091	22.91	37.38	3394611	4075544	680933	21.63	23.54	1.91	7.392
		(1x2)				13.96							29.3
	Ph-GG(%)	1	3	3_3394710	21.743	27.747	3394611	4075544	680933	24.623	25.254	0.631	36.22
		2	3	3_28568500	65	36.82	27356688	29277488	1920800	63.154	66.368	3.214	23.18
		4	7	7_5220521	22	6.594	609767	13193780	12584013	0	41.186	41.186	3.86
		3	4	4_26528512	64.386	6.777	22698558	27311183	4612625	59.812	66.59	6.778	3.98
		(1x2)				14.46							9.61
	Ph-G(%)	1	3	3_26660889	61	40.6685	26273113	29277488	3004375	58.77	66.368	7.598	39.17
		2	3	3_3394710 3	21.743	36.9057	3394611	4075544	680933	21.627	23.541	1.914	33.16
		(1x2)				27.45							20.8
	Ph-SGG(%)	1	3	3_3394710	21.743	50.0392	3394611	4075544	680933	21.627	23.541	1.914	45.846
		2	3	K2590b	64.83	34.007	26273113	29277488	3004375	58.77	66.36	7.59	23.085
		3	6	6_36100743	111.592	3.202	34032205	36100743	2068538	106.29	111.592	5.302	1.291
		(1x2)				24							13.711
	Ph-FGG(%)	1	3	3_4002091	22.91	38.2826	3394611	4075544	680933	21.627	23.541	1.91403	41.851
		2	3	3_26273113	60	32.1	26273113	26660889	387776	58.7701	61.906	3.13594	31.442
		3	4	4_8784350	15	4.17	6010436	13477667	7467231	12.704	43.319	30.615	2.547
		(1x2)				26.98							24.06
	Ph-CGG(%)	1	3	3_3394710	22	6.01215	3394589	4844562	1449973	20.924	23.952	3.02801	9.823
		2	3	3_10027571	31.7321	3.8997	7925825	34211276	26285451	27.452	75.0611	47.609	6.162
	Ph-TotalAcylated	1	3	3_3394710	21.74	21.05	2896034	4844562	1948.53	17.2	23.95	6.75	17.28
		2	3	3_28568500	65.34	18.68	27356688	29895002	2628314	65.12	67.52	2.37	15.74
	Ph-TotalNon-Acylated	1	3	3_28568500	65.34	21.33	27356688	30415643	3058955	63.15	68.95	5.8	21.33
		2	3	3_3324326	21.74	8.26	2896034	11598279	8702245	17.2	34.39	17.19	8.26
		3	4	4_26528512	64.39	6.23	24410562	29043565	4633003	62.97	68.88	5.91	6.23
	Ph-GG	1	3	3_28568500	65.3381	28.2486	27356688	30415643	3058955	63.1541	68.9471	5.79301	38.2
		2	7	7_5220521	21	10.7102	1965285	8144129	6178844	10.871	28.89	18.019	10.751
		3	3	3_2645888	16.699	9.64178	2501427	4844562	2343135	14.908	23.952	9.04402	9.511
		4	4	4_26528512	64.3861	9.52509	24410562	30359233	5948671	62.9691	72.5901	9.62104	9.378
	Ph-G	1	3	3_28568500	65.3381	27.6412	27356688	29895002	2538314	63.1541	67.5171	4.36301	33.514
		2	3	3_3324326	20	11.4224	2896034	5386392	2490358	17.203	25.12	7.91701	10.512
		3	4	4_26528512	64.3861	7.54683	25231548	27200449	1968901	63.3021	66.1341	2.83201	6.523
		4	7	7_2581400	13.523	6.83304	609767	8144129	7534362	0	28.89	28.89	5.839
	Ph-SGG	1	3	3_28568500	65.3381	17.3283	27356688	29895002	2538314	63.1541	67.5171	4.36301	51.01
		2	3	3_3394710	21.743	16.6262	2896034	4844562	1948528	17.203	23.952	6.74901	48.37
	Ph-FGG	1	3	3_3394710	21.743	30.2252	3394611	4075544	680933	21.627	23.541	1.91401	25.786
		2	3	3_28568500	65.3381	29.772	27356688	29277488	1920800	63.1541	66.3681	3.21401	25.195
		3	5	5_3003169	3.33	4.27218	1867584	6247610	4380026	0	6.064	6.064	2.356
		(1x2)				7.81							4.56
	Ph-CGG	1	3	3_3324326	20	8.84417	2501427	11598279	9096852	14.908	34.395	14.908	22.63
		2	3	3_29277488	66.3681	5.48198	25946244	30638001	4691757	56.7921	70.2651	56.7921	13.29
	† Refers to the map position of the maximum LOD value for each QTL
	1.5 LOD Intervals are expressed in physical (nt) and genetic distances (cM).
	Pigment content was expressed as either percentage (%) relative to the total anthocyanin content or as mg of cyanidin equivalents per gram of fresh weight (mg/g fw).
	QTL were named with the root tissue (ph=phloem) followed by the abbreviated quantitative trait, as described in first column of Table 2.

## Sheet: S7
	Suplementary Table 7. Marker allelic interactions for phloem anthocyanin QTL on chromosome 3 that revealed significant interactions
	Trait	Marker 1¥	Marker 2¥	LOD §	Marker genotypes *
					AA/AA	AA/AB	AA/BB	AB/AA	AB/AB	AB/BB	BB/AA	BB/AB	BB/BB
	Ph-TotalAcylated(%)	3_3394710	3_28568500	31.48	0.28±2.54 †	51.9±4.43	56.06±8.53	63.13±3.54	61.41±1.98	65.21±10.31	71.85±5.51	62.8±3.53	NA
	Ph-TotalNon-Acylated(%)	3_4002091	3_28568500	20	0±1.63	39.06±2.92	44.07±5.88	30.98±2.35	38.59±1.32	44.07±6.87	28.18±3.67	37.19±2.36	NA
	Ph-GG(%)	3_3394710	K2590b	14.44	0±0.76	15.45±1.39	19.96±3.17	11.52±1.11	16.81±0.64	14.98±3.26	11.31±1.79	16.21±1.15	20.69±4.65
	Ph-G(%)	3_3394710	3_26660889	27.45	0.01±1.02	23.83±1.83	24.65±4.32	18.25±1.48	21.51±0.87	21.322±2.27	17.74±2.50	20.41±1.46	21.49±6.11
	Ph-SGG(%)	3_3394710	K2590b	24.09	0±0.89	17.27±1.83	21.88±3.63	22.04±1.3	22.4±0.74	21.47±3.31	23.42±2.04	22.99±1.34	21.32±5.51
	Ph-FGG(%)	3_4002091	3_26660889	26.98	0±1.56	26.94±2.94	26.61±6.37	31.36±2.43	28.31±1.3	25.97±5.84	32.42±3.52	28.6±2.38	22.34±9.58
	† group means ± standard error
	* Genotypes for pair of markers associated with QTL for phloem pigments with significant interactions. Genotype for 'marker 1' appears first on left side of bar.
	¥ Name of the marker closest to the maximum LOD value of the QTL with significant interaction
	§ LOD value for the interaction between the two QTL. Significance threshold was obtained after 1000 permutation test (p<0.05)
	QTL were named with the root tissue (ph=phloem, xy=xylem) followed by the abbreviated quantitative trait, as described in first column of Table 2.

## Sheet: S8
	Supplementary Table S8. Summary of QTL for individual and combined anthocyanin pigments in purple roots of population 5171, detected with the Haley Knott regression mapping method.
	Trait	QTL	Chr.	Nearest marker	Position (cM) †	Max. LOD	1.5 LOD interval (nt)		Difference LOD interval (nt)	1.5 LOD interval (cM)		Difference LOD interval (cM)	% Var. Explained
	TotalANT	1	7	7_2986678	12.55	5.53203	65860	5679171	5613311	0	22.02	22.02	16.56
		2	3	3_27468363	69.19	4.92539	12347835	31144554	18796719	40.884	83.4581	42.574	14.55
	TotalAcylated(%)	1	3	3_27468363	69.19	57.02	27468363	29319767	1851404	69.17	71.82	2.65	90.71
	TotalNon-Acylated(%)	1	3	3_27468363	69.17	11.72	25954299	29319767	3365468	67.28	71.82	4.54	29.01
		2	7	7_3831279	17.49	5.87	2430600	5679171	3248571	11.08	22.02	10.94	12.74
	Cy3XGG(%)	1	3	3_27468363	69.19	23.39	25954299	29319767	3365468	67.28	71.82	4.54	62.78
	Cy3XG(%)	1	3	3_27468363	69.19	7.78	25954299	29319767	3365468	67.28	71.82	4.54	19.72
		2	7	7_3780468	16.943	6.46	2430600	5679171	3248571	11.08	22.02	10.94	15.91
		3	7	7_29746861	72.365	3.84	26452567	30927608	4475041	66.77	76.17	9.4	8.94
	Cy3XSGG(%)	1	3	3_27468363	69.19	24.52	25954299	29319767	3365468	67.28	71.82	4.54	55.92
		2	7	7_3780468	16.943	5.18	2780276	6489273	3708997	12.2	24.44	12.24	7.54
	Cy3XFGG(%)	1	3	3_27468363	69.19	50.09	27468363	29319767	1851404	69.17	71.82	2.65	87.95
	Cy3XCGG(%)	1	3	3_27468363	69.19	19.78	25954299	29319767	3365468	67.28	71.82	4.54	56.33
	TotalAcylated	1	3	3_27468363	69.173	6.67	12347835	31144554	18796719	40.88	83.46	42.58	16.94
		2	7	7_2986678	12.55	5.81	65860	5679171	5613311	0	22.01	22.01	14.49
	TotalNon-Acylated	1	7	7_3780468	16.943	5.12	68837	5679171	5610334	7.07	22.01	14.94	19.46
	Cy3XGG	1	7	7_5002412	20.68	5.08	65860	5679171	5613311	0	22.01	22.01	16.31
		2	3	3_27468363	69.19	4.17	23294254	31144554	7850300	61.93	83.46	21.53	13.13
	Cy3XG	1	7	7_3780468	16.943	4.91	68837	5679171	5610334	7.07	22.01	14.94	18.75
	Cy3XSGG	1	3	3_30320900	78.165	27.66	25954299	31144554	5190255	67.28	83.46	16.18	27.66
		2	7	7_2780276	12.2	8.012	65860	21175906	21110046	0	55.06	55.06	8.06
	Cy3XFGG	1	7	7_3382948	13.97	5.78	68837	5679171	5610334	0	22.02	22.02	14.44
		2	3	3_27468363	69.173	5.53	12347835	31144554	18796719	40.88	83.46	42.58	13.7
	Cy3XCGG	1	7	7_2986678	12.55	4.89	68837	5679171	5610334	0	22.02	22.02	11.93
		2	3	3_27468363	69.173	4.6	3105244	31144554	28039310	0	83.45	83.45	11.17
	† Refers to the map position of the maximum LOD value for each QTL
	1.5 LOD Intervals are expressed in physical (nt) and genetic distances (cM).
	The content of individual pigments is expressed as either percentage (%) relative to the total anthocyanin content, or as mg of cyanidin equivalents per gram of dry weight (mg/g dw).
	QTL were named with the root tissue (ph=phloem, xy=xylem) followed by the abbreviated quantitative trait, as described in Table 3.
	† Refers to the map position of the maximum LOD value for each QTL
	1.5 LOD Intervals are expressed in physical (nt) and genetic distances (cM).
	Pigment content was expressed as either percentage (%) relative to the total anthocyanin content or as mg of cyanidin equivalents per gram of dry weight (mg/g dw).
	QTL were named with the root tissue (ph=phloem, xy=xylem) followed by the abbreviated quantitative trait, as described in first column of Table 2.

## Sheet: S9
	Supplementary Table S9. Phenotypic information for carrot root and petioles color, and marker genotypes for the F2 samples used in QTL mapping
	Phenotype/Genotype	Ph-TotalANT	Ph-TotalNon-acylated	Ph-TotalAcylated	Ph-Cy3XGG	Ph-Cy3XG	Ph-Cy3XSGG	Ph-Cy3XFGG	Ph-Cy3XCGG	%Ph-TotalNon-Acylated	%Ph-TotalAcylated	%Ph-Cy3XGG	%Ph-Cy3XG	%Ph-Cy3XSGG	%Ph-Cy3XFGG	%Ph-Cy3XCGG	Xy-TotalANT	Xy-TotalNon-Acylated	Xy-TotalAcylated	Xy-Cy3XGG	Xy-Cy3XG	Xy-Cy3XSGG	Xy-Cy3XFGG	Xy-Cy3XCGG	%Xy-TotalNon-Acylated	%Xy-TotalAcylated	%Xy-Cy3XGG	%Xy-Cy3XG	%Xy-Cy3XSGG	%Xy-Cy3XFGG	%Xy-Cy3XCGG	Petioles	Xylem	3_288780	3_357544	3_359382	3_1296550	3_1437888	3_1520050	3_1590543	3_1650113	3_1866233	3_1875131	3_1900690	3_1956524	3_2105664	3_2153133	3_2501427	3_2543331
	Chromosome																																	3	3	3	3	3	3	3	3	3	3	3	3	3	3	3	3
	cM																																	0	5.992	6.336	9.156	9.874	10.102	10.145	10.884	11.257	11.867	12.395	12.571	12.971	13.554	14.908	15.165
	Sample
	0	NA	NA	NA	NA	NA	NA	NA	NA	NA	NA	NA	NA	NA	NA	NA	NA	NA	NA	NA	NA	NA	NA	NA	NA	NA	NA	NA	NA	NA	NA	1	1	A	A	A	A	A	A	A	A	A	A	A	A	A	A	A	A
	1	109.578	11.8667	97.7118	3.82394	8.04275	35.7217	60.1988	0	10.8294	89.1706	3.48968	7.33971	32.5992	54.9367	0	122.529	21.4496	101.08	5.74901	15.7006	30.6869	70.3926	0	17.5057	82.4943	4.69195	12.8138	25.0446	57.4497	0	1	1	B	B	B	B	B	B	B	B	B	B	B	B	B	B	B	B
	2	NA	NA	NA	NA	NA	NA	NA	NA	NA	NA	NA	NA	NA	NA	NA	NA	NA	NA	NA	NA	NA	NA	NA	NA	NA	NA	NA	NA	NA	NA	1	1	B	B	B	B	B	B	B	B	B	B	B	B	B	B	B	B
	3	454.424	191.299	263.125	84.8483	106.451	111.067	126.695	25.3624	42.097	57.903	18.6716	23.4254	24.4413	27.8805	5.58123	191.146	22.7075	168.439	8.01252	14.695	66.7555	101.683	0	11.8797	88.1203	4.19183	7.68783	34.9238	53.1965	0	1	1	B	B	B	B	B	B	B	B	B	B	B	B	B	B	B	B
	4	0	0	0	0	0	0	0	0	0	0	0	0	0	0	0	0	0	0	0	0	0	0	0	0	0	0	0	0	0	NA	0	0	H	H	H	A	A	A	A	A	A	A	A	A	A	A	A	A
	5	106.976	36.7392	70.2364	14.1821	22.5571	25.4673	42.9079	1.86127	34.3435	65.6565	13.2573	21.0862	23.8066	40.11	1.7399	0	0	0	0	0	0	0	0	0	0	0	0	0	0	0	0	0	B	B	B	B	B	B	B	B	B	B	B	B	H	H	H	H
	6	214.691	74.2193	140.472	28.3461	45.8732	48.6876	70.2613	21.5228	34.5703	65.4297	13.2032	21.3671	22.678	32.7267	10.025	0	0	0	0	0	0	0	0	0	0	0	0	0	0	0	0	0	H	H	H	H	H	H	H	H	H	H	H	H	H	H	H	H
	7	435.52	163.939	271.581	74.7137	89.2254	118.987	126.668	25.9257	37.6422	62.3578	17.1551	20.4871	27.3206	29.0844	5.95283	310.567	0	310.567	0	0	150.147	160.42	0	0	100	0	0	48.3461	51.6539	0	1	1	A	A	A	A	A	A	A	A	A	A	A	A	A	A	A	A
	8	0	0	0	0	0	0	0	0	0	0	0	0	0	0	0	0	0	0	0	0	0	0	0	0	0	0	0	0	0	0	0	0	A	A	A	A	A	A	A	A	A	A	A	A	A	A	A	A
	9	NA	NA	NA	NA	NA	NA	NA	NA	NA	NA	NA	NA	NA	NA	NA	NA	NA	NA	NA	NA	NA	NA	NA	NA	NA	NA	NA	NA	NA	NA	0	0	H	H	H	H	H	H	H	H	H	H	H	H	H	H	H	H
	10	538.767	229.605	309.162	104.535	125.07	122.588	139.785	46.7894	42.6168	57.3832	19.4026	23.2142	22.7534	25.9453	8.68453	201.729	13.7018	188.027	5.03766	8.66411	86.2919	101.735	0	6.79217	93.2078	2.49724	4.29493	42.7762	50.4316	0	1	1	B	B	B	H	H	H	H	H	H	H	H	H	H	H	H	H
	11	0	0	0	0	0	0	0	0	0	0	0	0	0	0	0	0	0	0	0	0	0	0	0	0	0	0	0	0	0	0	0	0	H	H	H	H	H	H	H	H	H	H	H	H	H	H	H	H
	12	212.835	81.5978	131.237	30.0274	51.5703	51.3189	75.4624	0	38.3386	61.6614	14.1083	24.2302	24.1121	35.4559	0	36.9211	0	36.9211	0	0	12.8747	24.0463	0	0	100	0	0	34.8709	65.1291	0	1	1	A	A	A	A	A	A	A	A	A	A	A	A	A	A	A	A
	14	230.012	66.547	163.465	22.2844	44.2626	62.2892	101.176	0	28.932	71.068	9.68836	19.2436	27.0809	43.9871	0	164.88	31.8554	133.025	11.5193	20.3361	46.8135	86.211	0	19.3204	80.6796	6.9865	12.3339	28.3925	52.2872	0	1	1	H	H	H	H	H	H	H	H	H	H	H	H	H	H	H	H
	18	296.435	116.492	179.942	42.8946	73.5978	66.9089	99.5032	13.5301	39.2979	60.7021	14.4702	24.8277	22.5712	33.5667	4.56427	0	0	0	0	0	0	0	0	0	0	0	0	0	0	0	0	0	A	H	H	H	H	H	H	H	H	H	H	H	H	H	H	H
	20	393.958	145.652	248.306	60.978	84.6744	79.4514	104.039	64.8151	36.9715	63.0285	15.4783	21.4932	20.1675	26.4087	16.4523	45.5676	9.90442	35.6632	3.66557	6.23884	12.028	23.6352	0	21.7357	78.2643	8.04426	13.6914	26.396	51.8684	0	1	1	H	H	H	H	H	H	H	H	H	H	H	H	H	H	H	H
	22	438.91	162.036	276.874	71.6677	90.3684	118.155	130.843	27.8759	36.9178	63.0822	16.3285	20.5893	26.9201	29.811	6.35115	243.049	13.0982	229.951	5.25092	7.84723	104.966	124.985	0	5.38909	94.6109	2.16044	3.22866	43.1872	51.4237	0	1	1	H	H	H	H	H	H	H	H	H	H	H	H	H	H	B	B
	23	NA	NA	NA	NA	NA	NA	NA	NA	NA	NA	NA	NA	NA	NA	NA	NA	NA	NA	NA	NA	NA	NA	NA	NA	NA	NA	NA	NA	NA	NA	NA	1	H	H	H	B	H	B	H	H	H	H	H	H	B	B	B	B
	25	494.892	222.849	272.043	104.884	117.965	115.044	124.593	32.4066	45.0299	54.9701	21.1933	23.8365	23.2462	25.1757	6.5482	333.068	49.4676	283.6	19.8811	29.5864	132.64	150.96	0	14.8521	85.1479	5.9691	8.883	39.8239	45.324	0	1	1	-	H	H	H	H	H	H	A	A	A	A	A	A	A	A	A
	30	0	0	0	0	0	0	0	0	0	0	0	0	0	0	0	0	0	0	0	0	0	0	0	0	0	0	0	0	0	0	0	0	A	A	A	A	A	A	A	A	A	A	A	A	A	A	A	A
	31	199.754	72.8751	126.878	31.4163	41.4588	52.565	62.7717	11.5419	36.4825	63.5175	15.7275	20.755	26.3149	31.4245	5.77805	0	0	0	0	0	0	0	0	0	0	0	0	0	0	0	0	0	H	H	H	H	H	H	H	H	A	H	H	H	H	H	H	H
	32	0	0	0	0	0	0	0	0	0	0	0	0	0	0	0	0	0	0	0	0	0	0	0	0	0	0	0	0	0	0	0	0	A	A	A	A	A	A	A	A	A	A	A	A	A	A	A	A
	33	0	0	0	0	0	0	0	0	0	0	0	0	0	0	0	0	0	0	0	0	0	0	0	0	0	0	0	0	0	0	0	0	A	A	A	A	A	A	A	A	A	A	A	A	A	A	A	A
	34	0	0	0	0	0	0	0	0	0	0	0	0	0	0	0	0	0	0	0	0	0	0	0	0	0	0	0	0	0	0	0	0	A	A	A	A	A	A	A	A	A	A	A	A	A	A	A	A
	35	362.618	161.721	200.897	69.7436	91.9778	83.8537	101.357	15.6868	44.5982	55.4018	19.2333	25.3649	23.1245	27.9513	4.32599	274.851	51.767	223.084	17.5458	34.2212	75.1328	147.951	0	18.8346	81.1654	6.38373	12.4508	27.3358	53.8296	0	1	1	B	B	B	B	B	B	B	B	B	B	B	B	B	B	B	B
	37	313.937	147.633	166.304	65.5734	82.0595	71.3493	85.5566	9.39792	47.0263	52.9737	20.8874	26.1389	22.7273	27.2528	2.99357	351.83	37.7593	314.071	0	37.7593	153.037	161.034	0	10.7323	89.2677	0	10.7323	43.4974	45.7703	0	1	1	A	A	A	A	A	A	A	A	A	A	A	A	A	A	A	A
	38	NA	NA	NA	NA	NA	NA	NA	NA	NA	NA	NA	NA	NA	NA	NA	0	0	0	0	0	0	0	0	0	0	0	0	0	0	0	1	0	B	B	B	B	B	B	B	B	-	B	B	B	B	B	B	B
	39	169.979	89.6954	80.2838	42.8413	46.8542	33.7682	41.6411	0	52.7685	47.2315	25.2038	27.5646	19.866	24.4978	0	130.32	14.6888	115.631	7.03704	7.65181	52.2078	63.423	0	11.2714	88.7286	5.39983	5.87156	40.0614	48.6673	0	1	1	A	A	A	A	A	A	A	A	A	A	A	A	A	A	A	A
	40	0	0	0	0	0	0	0	0	0	0	0	0	0	0	0	0	0	0	0	0	0	0	0	0	0	0	0	0	0	0	0	0	A	A	A	A	A	A	A	A	A	A	A	A	A	A	A	A
	41	426.426	184.292	242.135	80.7147	103.577	90.8006	109.963	41.371	43.2177	56.7823	18.9282	24.2895	21.2934	25.7872	9.70178	203.187	32.8873	170.3	14.8608	18.0266	78.7348	91.5649	0	16.1857	83.8143	7.31383	8.87192	38.7499	45.0643	0	1	1	B	H	H	H	H	H	H	H	H	H	H	H	A	H	H	H
	43	128.679	54.6659	74.0132	22.5785	32.0874	29.6331	38.5805	5.79961	42.4823	57.5177	17.5463	24.936	23.0287	29.9819	4.50703	NA	NA	NA	NA	NA	NA	NA	NA	NA	NA	NA	NA	NA	NA	NA	1	1	H	H	H	H	H	H	A	H	H	H	H	H	H	H	B	H
	44	455.918	181.513	274.406	80.6954	100.817	96.7388	114.81	62.8567	39.8125	60.1875	17.6995	22.113	21.2184	25.1822	13.7868	31.6441	0	31.6441	0	0	9.84076	21.8034	0	0	100	0	0	31.0982	68.9018	0	1	1	H	H	H	H	H	H	H	H	H	H	H	H	H	H	H	H
	45	0	0	0	0	0	0	0	0	0	0	0	0	0	0	0	0	0	0	0	0	0	0	0	0	0	0	0	0	0	0	0	0	A	A	A	A	A	A	A	A	A	A	A	A	A	A	A	A
	46	375.893	145.238	230.655	57.132	88.1055	72.9334	107.467	50.2549	38.638	61.362	15.199	23.439	19.4027	28.5898	13.3695	37.9747	3.13863	34.8361	1.11582	2.02281	9.98694	24.8492	0	8.26504	91.735	2.93831	5.32673	26.2989	65.436	0	1	1	-	H	H	H	H	H	H	H	H	H	H	H	H	H	H	B
	47	471.978	149.213	322.765	60.2152	88.9975	108.373	128.828	85.5646	31.6143	68.3857	12.7581	18.8563	22.9614	27.2953	18.1289	138.729	0	138.729	0	0	63.3677	75.3616	0	0	100	0	0	45.6772	54.3228	0	1	1	B	B	B	B	B	B	B	B	B	B	B	B	B	B	B	B
	48	189.423	31.4683	157.955	9.09453	22.3737	37.0464	80.791	40.1172	16.6127	83.3873	4.80118	11.8115	19.5575	42.6511	21.1787	0	0	0	0	0	0	0	0	0	0	0	0	0	0	0	0	0	B	B	B	B	B	B	B	B	B	B	B	B	B	B	B	B
	49	633.618	269.728	363.89	130.228	139.5	127.208	137.929	98.753	42.5695	57.4305	20.553	22.0165	20.0764	21.7685	15.5856	286.001	45.2407	240.76	21.3977	23.843	106.472	134.288	0	15.8184	84.1816	7.4817	8.33668	37.2279	46.9537	0	1	1	A	A	A	A	A	A	A	A	A	A	A	A	A	A	H	H
	50	460.808	149.086	311.721	63.2271	85.8592	104.462	124.508	82.7504	32.3533	67.6467	13.7209	18.6323	22.6694	27.0196	17.9577	15.7169	3.15322	12.5637	1.00154	2.15168	3.68828	8.36412	0.511254	20.0626	79.9374	6.37237	13.6903	23.467	53.2174	3.2529	1	1	H	H	H	H	H	H	H	H	-	H	H	H	H	H	H	H
	51	228.933	52.7162	176.216	16.2712	36.445	53.0568	90.9921	32.1675	23.027	76.973	7.10744	15.9195	23.1757	39.7462	14.0511	0	0	0	0	0	0	0	0	0	0	0	0	0	0	0	0	0	H	H	H	H	H	H	H	H	H	H	H	H	H	H	H	H
	52	356.296	146.1	210.196	59.4027	86.6971	78.3945	112.362	19.4397	41.0052	58.9948	16.6723	24.3329	22.0027	31.536	5.45607	107.483	6.90256	100.58	0	6.90256	28.4861	72.094	0	6.42203	93.578	0	6.42203	26.5029	67.075	0	1	1	B	B	B	B	B	B	B	B	B	B	B	B	B	B	B	B
	53	0	0	0	0	0	0	0	0	0	0	0	0	0	0	0	0	0	0	0	0	0	0	0	0	0	0	0	0	0	0	0	0	A	A	A	A	A	A	A	A	A	A	A	A	A	A	A	A
	54	612.189	252.457	359.732	122.514	129.944	118.769	131.12	109.842	41.2384	58.7616	20.0124	21.2261	19.4008	21.4183	17.9425	550.575	124.45	426.126	49.4748	74.9749	147.335	162.566	116.224	22.6036	77.3964	8.98602	13.6176	26.7603	29.5267	21.1095	1	1	H	H	B	-	H	H	H	H	B	A	H	H	H	H	A	H
	59	0	0	0	0	0	0	0	0	0	0	0	0	0	0	0	0	0	0	0	0	0	0	0	0	0	0	0	0	0	0	0	0	B	H	H	H	H	H	H	H	H	H	H	H	H	B	H	H
	61	0	0	0	0	0	0	0	0	0	0	0	0	0	0	0	0	0	0	0	0	0	0	0	0	0	0	0	0	0	0	0	0	A	A	A	A	A	A	A	A	A	A	A	A	A	A	A	A
	62	482.633	143.314	339.319	62.5902	80.7239	109.58	124.864	104.876	29.6942	70.3058	12.9685	16.7257	22.7045	25.8714	21.7299	223.13	22.0792	201.051	10.4007	11.6785	87.1235	105.456	8.4715	9.89524	90.1048	4.66129	5.23395	39.0461	47.262	3.79667	NA	1	H	H	H	H	H	H	H	H	H	H	H	H	H	H	H	H
	63	250.03	82.9496	167.08	31.707	51.2425	64.8364	86.4682	15.7756	33.1759	66.8241	12.6813	20.4946	25.9315	34.5831	6.3095	34.793	0	34.793	0	0	13.8465	20.9465	0	0	100	0	0	39.7969	60.2031	0	1	1	H	H	H	H	H	H	H	H	H	H	H	H	H	H	H	H
	64	176.019	61.5159	114.503	23.021	38.4949	37.6484	61.2809	15.5738	34.9485	65.0515	13.0787	21.8697	21.3888	34.815	8.84777	2.99733	0	2.99733	0	0	0	2.99733	0	0	100	0	0	0	100	0	1	1	B	H	H	B	B	B	B	B	B	B	B	B	B	B	B	B
	66	460.593	193.294	267.299	90.0866	103.207	93.8325	108.223	65.2437	41.9663	58.0337	19.5588	22.4074	20.3721	23.4965	14.1651	52.4269	3.46277	48.9641	0	3.46277	17.3052	31.659	0	6.60494	93.3951	0	6.60494	33.0082	60.3869	0	1	1	-	A	A	A	A	A	A	A	A	A	A	A	A	-	A	A
	67	398.29	122.455	275.835	48.7599	73.6948	89.2376	113.837	72.76	30.7451	69.2549	12.2423	18.5028	22.4052	28.5816	18.2681	0	0	0	0	0	0	0	0	0	0	0	0	0	0	0	0	0	B	H	H	H	H	H	H	H	B	H	H	H	H	H	H	H
	68	0	0	0	0	0	0	0	0	0	0	0	0	0	0	0	0	0	0	0	0	0	0	0	0	0	0	0	0	0	0	0	0	A	A	A	A	A	A	A	A	A	A	A	A	A	A	A	A
	70	0	0	0	0	0	0	0	0	0	0	0	0	0	0	0	0	0	0	0	0	0	0	0	0	0	0	0	0	0	0	0	0	B	H	H	A	A	A	A	A	A	A	A	A	A	A	A	A
	71	575.002	224.224	350.779	99.9977	124.226	122.375	141.236	87.1675	38.9952	61.0048	17.3908	21.6044	21.2826	24.5627	15.1595	156.71	96.9366	59.773	42.3921	54.5445	39.2711	10.564	9.93795	61.8575	38.1425	27.0514	34.8061	25.0598	6.74111	6.34164	1	1	B	H	H	H	H	H	H	H	H	H	H	H	H	H	H	H
	72	376.742	134.835	241.907	56.7908	78.0442	89.8195	108.114	43.9733	35.7897	64.2103	15.0742	20.7155	23.8411	28.6972	11.672	13.0758	2.00016	11.0756	0.588041	1.41212	3.92552	7.15012	0	15.2967	84.7033	4.49717	10.7995	30.0213	54.6821	0	1	1	H	H	H	-	H	H	H	H	H	H	H	H	H	H	H	H
	73	404.303	178.34	225.964	77.4412	100.899	92.9256	110.479	22.5589	44.1104	55.8896	19.1542	24.9562	22.9841	27.3258	5.57969	208.801	10.728	198.073	6.57846	4.14949	72.2424	116.705	9.1252	5.13789	94.8621	3.1506	1.9873	34.5988	55.893	4.3703	1	1	A	H	H	H	H	H	H	H	H	H	H	H	H	H	H	B
	81	444.928	136.038	308.89	51.4761	84.5614	97.1933	126.563	85.1339	30.5752	69.4248	11.5695	19.0056	21.8447	28.4458	19.1343	228.77	27.2341	201.536	7.63513	19.599	92.0171	109.519	0	11.9046	88.0954	3.33747	8.56711	40.2226	47.8729	0	1	1	A	B	H	H	H	H	H	H	A	A	H	H	H	H	H	B
	84	273.571	99.4169	174.154	36.4033	63.0136	62.2072	90.391	21.5559	36.3404	63.6596	13.3067	23.0337	22.739	33.0411	7.87945	0	0	0	0	0	0	0	0	0	0	0	0	0	0	0	0	0	B	B	B	B	B	B	B	B	H	H	H	H	H	A	H	A
	86	0	0	0	0	0	0	0	0	0	0	0	0	0	0	0	0	0	0	0	0	0	0	0	0	0	0	0	0	0	0	0	0	A	A	A	A	A	A	A	A	A	A	A	A	A	A	A	A
	87	421.528	130.926	290.601	54.647	76.2793	93.3336	113.749	83.5187	31.06	68.94	12.964	18.0959	22.1418	26.9849	19.8133	NA	NA	NA	NA	NA	NA	NA	NA	NA	NA	NA	NA	NA	NA	NA	1	1	H	H	H	H	H	H	H	H	H	H	H	H	H	H	H	H
	90	0	0	0	0	0	0	0	0	0	0	0	0	0	0	0	0	0	0	0	0	0	0	0	0	0	0	0	0	0	0	0	0	A	A	A	A	A	A	A	A	A	A	A	A	A	A	A	A
	92	469.022	168.179	300.843	78.8291	89.3498	113.903	122.551	64.3892	35.8573	64.1427	16.8071	19.0502	24.2853	26.129	13.7284	46.5101	0	46.5101	0	0	15.0289	31.4812	0	0	100	0	0	32.3132	67.6868	0	1	1	B	B	B	B	B	B	B	B	B	B	B	B	B	B	B	B
	93	0	0	0	0	0	0	0	0	0	0	0	0	0	0	0	0	0	0	0	0	0	0	0	0	0	0	0	0	0	0	0	0	H	A	H	H	H	H	H	H	H	H	H	H	B	H	H	H
	95	711.086	314.836	396.251	151.002	163.833	144.383	159.583	92.2846	44.2753	55.7247	21.2354	23.0399	20.3046	22.4422	12.978	319.379	0	319.379	0	0	154.649	164.73	0	0	100	0	0	48.4218	51.5782	0	1	1	B	H	H	H	H	H	H	H	H	H	H	H	H	H	H	H
	96	534.864	238.379	296.485	105.963	132.415	107.99	136.409	52.0861	44.5681	55.4319	19.8113	24.7568	20.1902	25.5035	9.7382	205.277	19.6034	185.674	7.30052	12.3029	81.8613	103.813	0	9.54974	90.4503	3.55642	5.99332	39.8784	50.5719	0	1	1	A	A	A	A	H	H	H	H	H	H	H	H	H	H	H	H
	97	223.996	87.1382	136.857	34.4959	52.6423	46.5115	70.8273	19.5186	38.9017	61.0983	15.4003	23.5015	20.7645	31.62	8.71384	0	0	0	0	0	0	0	0	0	0	0	0	0	0	0	0	0	B	B	B	B	B	B	B	B	B	B	B	B	B	B	B	B
	98	211.692	59.405	152.287	21.3282	38.0768	56.0196	77.8213	18.446	28.062	71.938	10.0751	17.9869	26.4628	36.7616	8.71361	0	0	0	0	0	0	0	0	0	0	0	0	0	0	0	0	0	B	B	B	B	B	B	B	B	B	B	B	B	B	B	B	B
	99	0	0	0	0	0	0	0	0	0	0	0	0	0	0	0	0	0	0	0	0	0	0	0	0	0	0	0	0	0	0	0	0	H	H	H	H	H	H	H	H	H	H	H	H	H	H	A	A
	103	340.742	137.313	203.429	60.2999	77.013	88.4734	104.167	10.7883	40.2983	59.7017	17.6967	22.6016	25.9649	30.5707	3.16612	71.1554	6.83106	64.3243	2.20474	4.62632	22.4943	41.83	0	9.6002	90.3998	3.09849	6.50171	31.6129	58.7869	0	1	1	A	A	A	A	A	A	A	A	A	A	A	A	A	A	A	A
	106	555.436	236.139	319.297	114.909	121.23	118.417	124.07	76.8104	42.5141	57.4859	20.688	21.8261	21.3197	22.3374	13.8288	396.503	47.6441	348.859	18.9142	28.7299	141.473	160.737	46.6488	12.0161	87.9839	4.77026	7.24583	35.6802	40.5386	11.7651	1	1	-	B	B	B	B	B	B	B	B	B	B	B	B	B	B	B
	109	0	0	0	0	0	0	0	0	0	0	0	0	0	0	0	0	0	0	0	0	0	0	0	0	0	0	0	0	0	0	0	0	A	A	A	A	A	A	A	A	A	A	A	A	A	A	A	A
	116	600.761	248.737	352.023	119.468	129.269	122.738	131.856	97.4298	41.4037	58.5963	19.8862	21.5176	20.4304	21.9481	16.2177	387.976	0	387.976	0	0	153.121	166.716	68.1394	0	100	0	0	39.4666	42.9706	17.5628	1	1	-	H	B	H	H	H	H	H	H	H	H	H	B	H	H	H
	118	629.795	226.293	403.503	99.0672	127.225	118.722	142.94	141.841	35.9311	64.0689	15.7301	20.2011	18.8509	22.6963	22.5217	81.0137	8.37579	72.6379	3.01588	5.35992	22.2167	46.3202	4.10099	10.3387	89.6613	3.72267	6.61606	27.4234	57.1758	5.06209	1	1	B	B	B	B	B	B	B	B	B	B	B	B	B	B	B	B
	119	0	0	0	0	0	0	0	0	0	0	0	0	0	0	0	0	0	0	0	0	0	0	0	0	0	0	0	0	0	0	0	0	A	A	A	A	A	A	A	A	A	A	A	A	A	A	A	A
	123	489.229	157.787	331.442	63.2235	94.5635	110.332	134.761	86.3479	32.2522	67.7478	12.9231	19.3291	22.5523	27.5457	17.6498	8.5903	0	8.5903	0	0	2.5996	5.9907	0	0	100	0	0	30.262	69.738	0	1	1	A	H	H	B	H	H	H	H	H	H	H	H	H	B	H	H
	124	200.212	67.8564	132.356	26.7516	41.1048	55.2239	70.935	6.19713	33.8922	66.1078	13.3616	20.5306	27.5826	35.4299	3.09528	11.9401	0	11.9401	0	0	4.60297	7.33711	0	0	100	0	0	38.5506	61.4494	0	1	1	H	H	H	H	H	H	H	H	H	H	H	H	H	H	H	H
	125	589.686	247.014	342.672	120.523	126.491	124.077	134.336	84.2585	41.8891	58.1109	20.4385	21.4506	21.0412	22.7809	14.2887	185.846	24.8576	160.988	7.42166	17.436	73.4046	87.5834	0	13.3754	86.6246	3.99345	9.38196	39.4976	47.127	0	1	1	H	H	H	A	H	H	H	A	H	H	H	H	H	H	H	H
	126	503.355	225.727	277.627	108.587	117.14	103.677	113.968	59.9827	44.8446	55.1554	21.5726	23.2719	20.5973	22.6416	11.9166	615.36	256.796	358.564	120.475	136.321	150.266	158.542	49.7554	41.7311	58.2689	19.578	22.153	24.4193	25.7641	8.08557	1	1	H	H	H	H	H	H	H	H	H	H	H	H	H	H	H	H
	128	394.352	176.174	218.178	75.6998	100.475	73.7865	106.164	38.227	44.6744	55.3256	19.196	25.4784	18.7108	26.9212	9.69362	303.91	27.2104	276.699	10.064	17.1463	109.661	140.143	26.8942	8.95344	91.0466	3.31152	5.64192	36.0836	46.1135	8.84942	1	1	A	A	A	A	A	A	A	A	A	A	A	A	A	A	A	A
	130	509.243	210.299	298.943	99.3548	110.945	107.902	118.102	72.9397	41.2965	58.7035	19.5103	21.7862	21.1887	23.1917	14.3232	213.346	39.8015	173.544	15.5299	24.2716	141.71	15.9169	15.9169	18.6559	81.3441	7.27922	11.3767	66.4229	7.4606	7.4606	1	1	A	A	A	A	A	A	H	H	H	H	H	H	H	H	H	H
	131	0	0	0	0	0	0	0	0	0	0	0	0	0	0	0	0	0	0	0	0	0	0	0	0	0	0	0	0	0	0	0	0	-	A	A	A	A	A	A	A	A	A	A	A	A	A	A	A
	133	192.196	70.5854	121.611	24.5305	46.0548	39.5237	72.7303	9.35695	36.7257	63.2743	12.7633	23.9624	20.5642	37.8417	4.86843	176.408	19.7699	156.638	7.65783	12.1121	58.4672	92.8693	5.30158	11.2069	88.7931	4.34098	6.86593	33.1432	52.6446	3.00529	1	1	A	A	A	A	A	A	A	A	A	A	A	A	A	A	A	A
	136	298.902	109.003	189.899	45.3531	63.6503	76.7309	94.6545	18.5136	36.4679	63.5321	15.1732	21.2947	25.6709	31.6674	6.19385	0	0	0	0	0	0	0	0	0	0	0	0	0	0	0	1	0	H	H	H	H	H	H	H	H	H	H	H	H	H	H	H	H
	138	392.042	176.941	215.101	73.3957	103.546	77.1995	110.186	27.7152	45.1332	54.8668	18.7214	26.4118	19.6916	28.1057	7.06944	62.0961	0	62.0961	0	0	19.0539	43.0422	0	0	100	0	0	30.6846	69.3154	0	1	1	A	A	A	A	A	A	A	A	A	A	A	A	A	A	A	A
	140	0	0	0	0	0	0	0	0	0	0	0	0	0	0	0	0	0	0	0	0	0	0	0	0	0	0	0	0	0	0	0	0	A	A	A	A	A	A	A	A	A	A	A	A	A	A	A	A
	141	0	0	0	0	0	0	0	0	0	0	0	0	0	0	0	0	0	0	0	0	0	0	0	0	0	0	0	0	0	0	0	0	H	H	H	H	H	H	H	H	H	H	H	H	H	H	H	H
	143	154.703	45.109	109.594	17.1201	27.9889	45.8123	58.3797	5.40209	29.1584	70.8416	11.0664	18.092	29.6131	37.7366	3.4919	180.027	15.3784	164.648	6.34454	9.03386	63.9753	100.673	0	8.54228	91.4577	3.52422	5.01806	35.5365	55.9212	0	1	1	H	H	H	H	H	H	H	H	H	H	H	H	H	H	H	H
	144	113.729	45.0001	68.7288	16.0015	28.9986	23.017	40.9385	4.77325	39.5678	60.4322	14.0699	25.498	20.2385	35.9966	4.19705	0	0	0	0	0	0	0	0	0	0	0	0	0	0	0	1	0	H	H	H	A	A	A	A	A	A	A	A	A	A	A	A	A
	145	0	0	0	0	0	0	0	0	0	0	0	0	0	0	0	0	0	0	0	0	0	0	0	0	0	0	0	0	0	0	0	0	H	H	H	H	H	H	H	H	H	H	H	H	H	H	H	H
	147	0	0	0	0	0	0	0	0	0	0	0	0	0	0	0	0	0	0	0	0	0	0	0	0	0	0	0	0	0	0	0	0	A	A	A	A	A	A	A	A	A	A	A	A	A	A	A	A
	148	580.216	230.157	350.059	107.621	122.536	106.824	125.428	117.807	39.6675	60.3325	18.5485	21.119	18.4111	21.6174	20.3039	414.622	0	414.622	0	0	146.45	164.267	103.905	0	100	0	0	35.3213	39.6185	25.0602	1	1	H	H	H	H	H	H	H	H	H	H	H	H	H	H	H	H
	149	576.477	213.43	363.048	94.0086	119.421	107.685	129.607	125.755	37.0231	62.9769	16.3074	20.7156	18.6799	22.4826	21.8144	76.5766	12.4498	64.1268	5.48931	6.96049	20.9981	43.1288	0	16.258	83.742	7.16839	9.08958	27.421	56.321	0	1	1	H	H	H	H	H	H	H	H	H	H	H	H	H	H	H	H
	152	0	0	0	0	0	0	0	0	0	0	0	0	0	0	0	0	0	0	0	0	0	0	0	0	0	0	0	0	0	0	0	0	H	H	H	H	H	H	H	H	H	H	H	H	H	H	H	H
	154	375.462	135.508	239.953	54.8449	80.6633	83.0824	105.74	51.1308	36.0911	63.9089	14.6073	21.4838	22.1281	28.1627	13.6181	83.564	9.31987	74.2441	2.97989	6.33998	23.3885	48.6633	2.19226	11.153	88.847	3.566	7.58697	27.9887	58.2348	2.62345	1	1	B	B	B	B	B	B	B	B	B	B	B	B	-	B	B	B
	155	0	0	0	0	0	0	0	0	0	0	0	0	0	0	0	0	0	0	0	0	0	0	0	0	0	0	0	0	0	0	0	0	A	A	A	A	A	A	A	A	A	A	A	A	A	A	A	A
	156	616.825	233.864	382.961	109.22	124.644	122.525	136.822	123.614	37.9142	62.0858	17.7069	20.2073	19.8637	22.1816	20.0404	364.245	35.3831	328.862	17.293	18.0901	130.275	145.733	52.8539	9.71408	90.2859	4.74763	4.96646	35.7657	40.0097	14.5105	1	1	A	-	H	H	H	H	H	H	-	A	A	H	B	H	H	H
	159	156.117	45.0917	111.025	16.7969	28.2949	43.0035	60.2686	7.75326	28.8833	71.1167	10.7592	18.1241	27.5457	38.6047	4.96631	0	0	0	0	0	0	0	0	0	0	0	0	0	0	0	0	0	H	H	H	H	H	H	H	H	H	H	H	H	H	H	H	H
	160	654.676	264.654	390.022	128.377	136.278	130.112	139.883	120.027	40.4252	59.5748	19.6092	20.8161	19.8742	21.3668	18.3338	115.644	15.0262	100.618	5.21236	9.81388	36.0153	64.6028	0	12.9935	87.0065	4.50724	8.48626	31.1431	55.8634	0	1	1	A	A	A	A	A	A	A	A	A	A	A	A	A	A	A	H
	161	539.045	248.386	290.658	114.78	133.606	101.509	124.783	64.3668	46.0789	53.9211	21.2933	24.7857	18.8313	23.1489	11.9409	585.69	223.154	362.536	96.0416	127.113	133.731	158.758	70.0462	38.1011	61.8989	16.398	21.7031	22.8331	27.1062	11.9596	1	1	H	H	H	H	H	H	H	H	H	H	H	H	H	H	H	H
	167	0	0	0	0	0	0	0	0	0	0	0	0	0	0	0	0	0	0	0	0	0	0	0	0	0	0	0	0	0	0	NA	0	A	A	A	A	A	A	A	A	A	A	A	A	A	A	A	A
	168	341.492	105.47	236.022	45.9348	59.5353	86.8452	98.7556	50.4207	30.8851	69.1149	13.4512	17.4339	25.4311	28.9189	14.7648	0	0	0	0	0	0	0	0	0	0	0	0	0	0	0	0	0	B	B	B	B	B	B	B	B	B	B	B	B	B	B	B	B
	170	362.796	144.631	218.165	62.8659	81.7652	85.854	101.342	30.9696	39.8656	60.1344	17.3281	22.5375	23.6645	27.9335	8.53637	128.01	18.697	109.313	5.86798	12.829	42.4179	66.8947	0	14.6059	85.3941	4.58401	10.0219	33.1365	52.2576	0	1	1	A	B	H	H	H	H	H	H	A	A	H	H	A	H	H	A
	171	0	0	0	0	0	0	0	0	0	0	0	0	0	0	0	0	0	0	0	0	0	0	0	0	0	0	0	0	0	0	0	0	A	A	A	A	A	A	A	A	A	A	A	A	A	A	A	A
	174	48.4809	6.29995	42.1809	1.92986	4.37009	13.3202	27.4711	1.38961	12.9947	87.0053	3.98067	9.01405	27.4752	56.6637	2.86631	0	0	0	0	0	0	0	0	0	0	0	0	0	0	0	0	0	H	H	H	H	H	H	H	H	H	H	H	H	B	H	H	H
	178	396.558	149.365	247.193	63.6921	85.6725	85.6675	105.285	56.2406	37.6653	62.3347	16.0612	21.604	21.6028	26.5497	14.1822	0	0	0	0	0	0	0	0	0	0	0	0	0	0	0	0	0	B	H	H	H	H	H	H	H	A	H	H	H	H	H	H	B
	181	0	0	0	0	0	0	0	0	0	0	0	0	0	0	0	0	0	0	0	0	0	0	0	0	0	0	0	0	0	0	0	0	H	H	H	H	H	H	H	H	H	H	H	H	H	H	H	H
	183	508.166	208.016	300.15	89.6444	118.371	109.947	135.979	54.2238	40.9346	59.0654	17.6408	23.2938	21.6361	26.7588	10.6705	194.888	17.0694	177.818	5.99514	11.0743	79.8411	97.9771	0	8.75859	91.2414	3.0762	5.68238	40.9678	50.2736	0	1	1	-	B	B	B	B	B	B	B	B	B	B	B	-	B	B	B
	185	196.147	79.7526	116.394	0	79.7526	0	103.731	12.663	40.6597	59.3403	0	40.6597	0	52.8844	6.45588	300.69	54.1893	246.501	20.8399	33.3494	114.167	132.335	0	18.0216	81.9784	6.93067	11.0909	37.9682	44.0102	0	1	1	A	A	A	A	A	A	A	A	A	A	A	A	A	A	A	A
	186	345.499	153.648	191.851	66.3955	87.2523	78.0951	94.918	18.8382	44.4713	55.5287	19.2173	25.254	22.6036	27.4727	5.45245	174.682	10.229	164.453	3.77851	6.45047	65.7307	98.7222	0	5.85578	94.1442	2.16308	3.6927	37.6288	56.5154	0	1	1	B	B	B	B	B	B	B	B	B	B	B	B	B	B	B	B
	187	516.233	219.352	296.881	103.701	115.651	105.471	117.09	74.3199	42.4908	57.5092	20.088	22.4029	20.4309	22.6817	14.3966	15.5612	0	15.5612	0	0	3.75004	11.8112	0	0	100	0	0	24.0986	75.9014	0	1	1	A	A	A	A	A	A	A	A	A	A	A	A	H	H	H	H
	188	272.422	34.953	237.469	13.4691	21.4839	70.1924	92.409	74.8678	12.8305	87.1695	4.9442	7.88626	25.766	33.9212	27.4823	0	0	0	0	0	0	0	0	0	0	0	0	0	0	0	0	0	B	B	B	B	B	B	B	B	B	B	B	B	B	B	B	B
	189	521.649	213.773	307.876	101.621	112.152	111.916	121.915	74.0449	40.9803	59.0197	19.4808	21.4995	21.4542	23.3711	14.1944	381.101	90.3331	290.768	36.1809	54.1522	116.498	139.393	34.8773	23.7032	76.2968	9.49379	14.2094	30.5687	36.5763	9.15173	1	1	A	H	H	H	H	H	H	H	A	H	H	H	H	H	H	H
	193	396.712	190.953	205.759	82.6917	108.261	80.4233	101.818	23.5175	48.1339	51.8661	20.8443	27.2897	20.2725	25.6655	5.92811	0	0	0	0	0	0	0	0	0	0	0	0	0	0	0	0	0	H	H	H	H	H	H	H	H	H	H	H	H	H	H	H	H
	194	302.962	111.949	191.013	42.1944	69.7547	72.0167	95.8683	23.1281	36.9515	63.0485	13.9273	23.0242	23.7708	31.6437	7.634	12.604	0	12.604	0	0	0	12.604	0	0	100	0	0	0	100	0	1	1	A	A	A	A	A	A	A	A	A	A	A	A	A	A	A	A
	196	0	0	0	0	0	0	0	0	0	0	0	0	0	0	0	0	0	0	0	0	0	0	0	0	0	0	0	0	0	0	0	0	A	H	H	A	A	A	A	A	A	A	A	A	A	A	A	A
	198	501.99	221.836	280.154	103.654	118.182	107.094	120.546	52.5139	44.1914	55.8086	20.6487	23.5427	21.3338	24.0137	10.4612	274.707	0	274.707	0	0	129.104	145.603	0	0	100	0	0	46.997	53.003	0	1	1	A	H	H	H	H	H	H	H	H	H	H	H	H	H	H	B
	200	374.927	113.01	261.917	45.7196	67.2902	97.1366	116.254	48.5268	30.1419	69.8581	12.1943	17.9476	25.9082	31.007	12.943	48.7905	5.6868	43.1037	1.74402	3.94278	13.2903	29.8134	0	11.6555	88.3445	3.5745	8.08104	27.2396	61.1049	0	1	1	A	A	A	H	H	H	H	H	H	H	H	H	H	H	H	H
	201	318.768	132.233	186.535	55.8063	76.4269	71.2196	90.6867	24.6285	41.4826	58.5174	17.5069	23.9757	22.3422	28.4491	7.72614	39.089	4.56534	34.5237	0	4.56534	9.80685	24.7169	0	11.6793	88.3207	0	11.6793	25.0885	63.2322	0	1	1	A	A	A	A	A	A	A	A	A	A	A	A	A	A	A	A
	202	316.937	104.077	212.86	41.0435	63.0332	70.9884	94.8923	46.9793	32.8383	67.1617	12.9501	19.8883	22.3983	29.9405	14.8229	0	0	0	0	0	0	0	0	0	0	0	0	0	0	0	0	0	H	H	H	H	H	H	H	H	H	H	H	H	H	H	H	H
	203	450.8	194.203	256.597	87.0636	107.139	111.505	127.28	17.812	43.0796	56.9204	19.3131	23.7665	24.7349	28.2343	3.95119	124.842	0	124.842	0	0	47.8718	76.97	0	0	100	0	0	38.346	61.654	0	1	1	B	B	B	B	B	B	B	B	B	B	B	B	B	B	B	B
	204	515.661	217.633	298.028	101.732	115.901	103.604	117.308	77.1164	42.2046	57.7954	19.7284	22.4763	20.0915	22.749	14.9549	649.825	213.81	436.015	96.4821	117.328	161.348	168.55	106.117	32.9027	67.0973	14.8474	18.0553	24.8295	25.9377	16.3301	1	1	B	B	B	B	B	B	B	B	B	B	B	B	B	B	B	B
	205	399.686	128.272	271.414	55.5423	72.7298	94.1362	108.117	69.1612	32.0932	67.9068	13.8965	18.1967	23.5525	27.0504	17.3039	0	0	0	0	0	0	0	0	0	0	0	0	0	0	0	0	0	H	B	H	H	H	H	H	H	H	H	H	H	H	H	H	H
	206	275.851	110.167	165.683	44.6012	65.5662	56.1556	78.5904	30.9373	39.9373	60.0627	16.1686	23.7687	20.3572	28.4902	11.2152	0	0	0	0	0	0	0	0	0	0	0	0	0	0	0	0	0	H	H	H	H	H	H	H	H	H	H	H	H	H	H	H	H
	207	559.029	251.077	307.952	117.024	134.053	103.41	127.321	77.2207	44.913	55.087	20.9334	23.9796	18.4982	22.7754	13.8134	576.174	175.342	400.832	70.3214	105.021	149.734	168.235	82.8635	30.4322	69.5678	12.2049	18.2273	25.9876	29.1986	14.3817	1	1	B	B	B	B	B	B	B	H	H	H	H	H	H	H	H	H
	208	564.829	271.892	292.937	125.335	146.558	109.898	137.016	46.0234	48.137	51.863	22.1898	25.9472	19.4568	24.2579	8.1482	220.647	13.3064	207.341	0	13.3064	79.0936	128.247	0	6.0306	93.9694	0	6.0306	35.8462	58.1232	0	1	1	A	A	A	A	A	A	A	A	A	A	A	A	A	A	A	A
	210	479.813	150.754	329.059	61.5832	89.1704	106.785	130.105	92.1696	31.4192	68.5808	12.8348	18.5844	22.2555	27.1158	19.2095	21.7856	0	21.7856	0	0	9.50066	12.2849	0	0	100	0	0	43.6098	56.3902	0	1	1	B	B	B	B	B	B	B	B	B	B	B	B	B	B	B	B
	211	0	0	0	0	0	0	0	0	0	0	0	0	0	0	0	0	0	0	0	0	0	0	0	0	0	0	0	0	0	0	0	0	A	A	A	A	A	A	A	A	A	A	A	A	A	A	A	A
	213	437.571	210.116	227.455	100.564	109.551	86.297	97.5267	43.6315	48.0187	51.9813	22.9824	25.0363	19.7218	22.2882	9.9713	273.469	66.1607	207.308	21.8464	44.3143	94.3382	112.97	0	24.1931	75.8069	7.98862	16.2045	34.4968	41.31	0	1	1	H	H	H	H	H	H	H	H	H	H	H	H	H	H	H	H
	214	179.061	45.6003	133.46	14.9198	30.6805	47.4979	74.1066	11.8559	25.4664	74.5336	8.33225	17.1341	26.5262	41.3863	6.62115	7.2944	0	7.2944	0	0	2.81552	4.47888	0	0	100	0	0	38.5983	61.4017	0	1	1	H	H	H	H	H	H	H	H	H	H	H	H	H	H	H	H
	215	541.598	231.644	309.954	108.4	123.244	112.826	126.511	70.6173	42.7704	57.2296	20.0149	22.7555	20.832	23.3589	13.0387	72.6486	4.62655	68.022	0	4.62655	21.5804	46.4417	0	6.3684	93.6316	0	6.3684	29.7052	63.9264	0	1	1	-	B	B	B	B	B	B	B	B	B	B	B	B	B	B	B
	216	249.252	71.9834	177.269	28.5589	43.4245	75.9639	93.2861	8.019	28.8797	71.1203	11.4578	17.4219	30.4767	37.4264	3.21722	44.2253	3.22663	40.9987	0	3.22663	28.4323	12.5665	0	7.29587	92.7041	0	7.29587	64.2895	28.4146	0	1	1	H	H	H	H	H	H	H	H	H	H	H	H	H	H	H	H
	218	0	0	0	0	0	0	0	0	0	0	0	0	0	0	0	0	0	0	0	0	0	0	0	0	0	0	0	0	0	0	0	0	H	H	H	H	H	H	H	H	A	A	A	A	A	A	A	A
	219	0	0	0	0	0	0	0	0	0	0	0	0	0	0	0	0	0	0	0	0	0	0	0	0	0	0	0	0	0	0	0	0	H	H	H	H	H	H	H	H	H	H	H	H	H	H	H	H
	220	558.476	229.171	329.305	103.868	125.304	100.128	127.197	101.979	41.0351	58.9649	18.5984	22.4367	17.9289	22.7758	18.2602	174.869	13.3092	161.559	3.56624	9.74299	56.7003	96.5549	8.30426	7.61099	92.389	2.03938	5.57161	32.4245	55.2157	4.74886	1	1	A	H	H	H	H	H	H	H	H	H	H	H	H	H	H	H
	221	231.673	57.8011	173.872	18.9983	38.8028	57.92	105.708	10.2437	24.9494	75.0506	8.20048	16.749	25.0007	45.6282	4.42162	0	0	0	0	0	0	0	0	0	0	0	0	0	0	0	1	0	H	H	H	H	H	H	H	H	H	H	H	H	H	H	H	H
	223	415.868	187.17	228.698	80.6538	106.516	88.2245	110.941	29.5323	45.0071	54.9929	19.3941	25.613	21.2145	26.677	7.10135	44.8834	3.42505	41.4583	1.0467	2.37835	14.6914	26.7669	0	7.631	92.369	2.33205	5.29895	32.7324	59.6366	0	1	1	A	H	H	H	H	H	H	H	H	H	H	H	H	H	H	H
	224	512.439	171.534	340.905	75.7315	95.8028	128.158	145.968	66.7787	33.4741	66.5259	14.7786	18.6955	25.0094	28.485	13.0315	NA	NA	NA	NA	NA	NA	NA	NA	NA	NA	NA	NA	NA	NA	NA	0	1	B	B	B	B	B	B	B	B	B	B	B	B	B	B	B	B
	225	669.841	265.739	404.102	127.896	137.843	142.905	148.926	112.272	39.6719	60.3281	19.0934	20.5785	21.3342	22.233	16.7609	323.573	0	323.573	0	0	156.742	166.831	0	0	100	0	0	48.441	51.559	0	1	1	B	B	B	B	B	B	B	B	B	B	B	B	B	B	B	B
	227	416.314	183.126	233.188	78.1743	104.951	82.9512	113.267	36.97	43.9874	56.0126	18.7777	25.2097	19.9252	27.2071	8.88032	89.8017	7.01447	82.7872	0	7.01447	34.6847	48.1026	0	7.81106	92.1889	0	7.81106	38.6236	53.5653	0	1	1	H	H	H	H	H	H	H	H	H	H	H	H	H	H	H	H
	228	418.03	126.388	291.642	53.2264	73.1618	103.618	117.373	70.6508	30.2342	69.7658	12.7327	17.5016	24.7872	28.0776	16.9009	239.349	30.0898	209.259	14.4822	15.6075	84.4487	106.091	18.7195	12.5715	87.4285	6.05069	6.52084	35.2827	44.3248	7.82101	1	1	B	B	B	B	B	B	B	B	B	B	B	B	B	B	B	B
	230	0	0	0	0	0	0	0	0	0	0	0	0	0	0	0	0	0	0	0	0	0	0	0	0	0	0	0	0	0	0	0	0	B	B	B	B	B	B	B	B	B	B	B	B	B	B	B	B
	231	0	0	0	0	0	0	0	0	0	0	0	0	0	0	0	0	0	0	0	0	0	0	0	0	0	0	0	0	0	0	0	0	A	A	A	A	A	A	A	A	A	A	A	A	A	A	A	A
	232	205.376	67.5561	137.819	27.3462	40.2099	57.8306	71.3944	8.59445	32.8939	67.1061	13.3152	19.5787	28.1584	34.7629	4.18475	38.8028	0	38.8028	0	0	11.083	26.8948	0.825073	0	100	0	0	28.5623	69.3113	2.12632	1	1	H	H	H	H	H	H	H	H	H	H	H	H	H	H	H	H
	233	69.0223	12.6814	56.3408	3.75778	8.92366	17.4803	36.2279	2.63265	18.373	81.627	5.4443	12.9287	25.3255	52.4873	3.8142	0	0	0	0	0	0	0	0	0	0	0	0	0	0	0	0	0	H	H	H	H	H	H	H	H	H	H	H	H	H	H	H	H
	234	545.552	242.394	303.158	112.691	129.703	113.582	129.701	59.8747	44.431	55.569	20.6563	23.7747	20.8197	23.7742	10.9751	453.068	133.717	319.351	49.7991	83.918	127.36	159.442	32.5484	29.5137	70.4863	10.9915	18.5222	28.1106	35.1917	7.184	1	1	H	H	H	H	H	H	H	H	H	H	H	H	H	H	H	H
	235	430.061	143.465	286.596	61.5491	81.9156	107.548	123.371	55.6779	33.3592	66.6408	14.3117	19.0474	25.0075	28.6868	12.9465	234.79	26.9234	207.867	10.2947	16.6287	88.5841	119.283	0	11.467	88.533	4.38465	7.08236	37.7291	50.8039	0	1	1	H	H	H	H	H	H	H	H	H	H	H	H	H	H	H	H
	238	251.793	92.3512	159.442	37.0964	55.2547	66.7914	86.693	5.95752	36.6774	63.3226	14.7329	21.9445	26.5263	34.4303	2.36604	0	0	0	0	0	0	0	0	0	0	0	0	0	0	0	1	0	H	H	H	H	H	H	H	H	H	H	H	H	H	H	H	H
	239	377.636	166.816	210.82	72.833	93.9827	88.7711	106.063	15.9863	44.1737	55.8263	19.2866	24.8871	23.5071	28.086	4.23326	162.475	17.216	145.259	6.19224	11.0237	55.0839	85.0668	5.10871	10.596	89.404	3.81118	6.78486	33.9029	52.3567	3.1443	1	1	H	H	H	H	H	H	H	H	H	H	H	H	H	H	H	H
	240	0	0	0	0	0	0	0	0	0	0	0	0	0	0	0	0	0	0	0	0	0	0	0	0	0	0	0	0	0	0	0	0	A	A	A	A	A	A	A	A	A	A	A	A	A	A	A	A
	241	627.662	263.646	364.016	125.767	137.879	122.441	136.807	104.768	42.0045	57.9955	20.0373	21.9671	19.5075	21.7962	16.6918	293.456	36.9327	256.524	12.9837	23.949	109.037	129.834	17.6521	12.5854	87.4146	4.42442	8.161	37.1562	44.2431	6.01523	1	1	H	H	H	H	H	H	H	H	H	H	H	H	H	H	H	H
	243	418.274	151.577	266.697	62.7152	88.8621	89.2632	113.577	63.8563	36.2387	63.7613	14.9938	21.2449	21.3408	27.1538	15.2666	0	0	0	0	0	0	0	0	0	0	0	0	0	0	0	0	0	B	B	B	B	B	B	B	B	B	B	B	B	B	B	B	B
	244	297.662	121.999	175.663	52.8357	69.1631	73.9555	90.6017	11.1059	40.9857	59.0143	17.7503	23.2355	24.8455	30.4378	3.73104	0	0	0	0	0	0	0	0	0	0	0	0	0	0	0	0	0	H	H	H	H	H	H	H	H	H	H	H	H	H	H	H	H
	245	0	0	0	0	0	0	0	0	0	0	0	0	0	0	0	0	0	0	0	0	0	0	0	0	0	0	0	0	0	0	0	0	A	A	A	A	A	A	A	A	A	A	A	A	A	A	A	A
	246	0	0	0	0	0	0	0	0	0	0	0	0	0	0	0	0	0	0	0	0	0	0	0	0	0	0	0	0	0	0	0	0	H	H	H	H	H	H	H	H	A	A	A	A	A	A	A	A
	248	318.135	146.676	171.459	61.6676	85.0088	69.5403	91.8066	10.112	46.105	53.895	19.3841	26.721	21.8587	28.8577	3.17851	67.0489	0	67.0489	0	0	42.3912	24.6576	0	0	100	0	0	63.2244	36.7756	0	1	1	A	A	A	A	A	A	A	A	A	A	A	A	A	A	A	A
	249	0	0	0	0	0	0	0	0	0	0	0	0	0	0	0	0	0	0	0	0	0	0	0	0	0	0	0	0	0	0	0	0	A	A	A	A	A	A	A	A	A	A	A	A	A	A	A	A
[truncated: 997 more columns]

[truncated: 10 more sheets: S10, S11, S12, S13, S14, S15, S16, S17, S18, S19]
